# Supplementary material for: CUPiD: A cfDNA methylation-based tissue-of-origin classifier for Cancers of Unknown Primary
Source: Research Square preprint supplement (doi:10.21203/rs.3.rs-3758456/v1), 2023-12-26
Supplement: Supplementary file 1 [file 193feb6d8c4183cd9c78c09a.xlsx]

## Sheet: NCC01_metrics
Supplementary Table 2: Clinical characteristics and T7-MBD-Seq metrics of 79 NCC cfDNA samples used for building the classifiers. Sequencing details for the enriched fraction (blue) and non-enriched fraction (green).
sample_name	age	sex	source	cfDNA yield (ng/mL)	DNA input (ng)	ichorCNA Tumour Fraction	Hyper-stable Fraction	Initial Reads	Mapped Reads	Deduplicated Reads	Total Fragments in QSEA	Final Valid Fragments	enrichment score (relH)	enrichment score (GoGe)	Initial Reads (non-enriched)	Mapped Reads (non-enriched)	Deduplicated Reads (non-enriched)	Total Fragments in QSEA (non-enriched)	Final Valid Fragments (non-enriched)	enrichment score (relH), non-enriched	enrichment score (GoGe), non-enriched
NCC0001	25-34	Male	Locally collected at the University of Manchester	4.32	22.5	0.01309	0.61	49044582	45810072	27309501	8313661	7114324	5.21866	2.46449	6040524	5490355	5117689	2101847	2028620	1.32371	0.971402
NCC0002	45-54	Female	Locally collected at the University of Manchester	2.76	14.4	0.007813	0.647	43857836	41190686	24692329	7651740	6476939	5.1539	2.42967	4223870	3836158	3579903	1475947	1397876	1.37799	0.982295
NCC0003	45-54	Female	Locally collected at the University of Manchester	1.32	6.9	0.008161	0.479	22325324	20634703	12444293	3719138	3111349	5.44281	2.50954	2750706	2401347	2234599	899595	852316	1.41254	0.983669
NCC0004	Unknown	Male	Locally collected at the University of Manchester	7.47	25.1	0.0036	0.682	89428108	84224171	48986456	15615639	13359754	5.46252	2.49479	11403926	10560267	9785438	3980309	3846415	1.383	0.979703
NCC0005	45-54	Female	Locally collected at the University of Manchester	6.2	25	0.00459	0.68	89313410	83789061	48937702	15076360	12678141	5.49876	2.51688	10801452	10118935	9495260	3812197	3610921	1.36468	0.979587
NCC0006	35-44	Male	Locally collected at the University of Manchester	1.88	9.8	0.004744	0.555	29133294	26680367	15720149	5014619	4294561	4.9228	2.39577	3210188	2741269	2552783	1037532	1000435	1.40109	0.986797
NCC0007	35-44	Female	Locally collected at the University of Manchester	1.03	5.3	0.009634	0.551	27952300	25311403	14939360	4717803	3971018	5.26572	2.45409	3310562	2871939	2659157	1081237	1024877	1.38667	0.982688
NCC0008	45-54	Female	Locally collected at the University of Manchester	2.79	14.5	0.005959	0.659	65960544	61606747	36234857	11176327	9367984	5.46519	2.49074	7839364	7181074	6673929	2713558	2568999	1.38212	0.98195
NCC0009	64	Female	Cambridge Biosciences	5.46	25	0.009596	0.477	47738908	44730698	30508545	11888945	10562546	2.65664	1.69959	6551828	4968300	4373049	1786395	1686771	1.0803	0.912974
NCC0010	57	Male	Cambridge Biosciences	3.83	17.89	0.01252	0.394	16512650	15602651	11724250	4352130	3879696	3.49352	1.94117	2604592	1734868	1598620	628661	606685	1.25891	0.976372
NCC0011	65	Male	Cambridge Biosciences	3.25	25	0.01274	0.555	44017016	42549934	33229518	12271515	10872153	3.78764	2.0943	3914292	3565482	3342219	1377495	1331963	1.35922	0.977886
NCC0012	57	Female	Cambridge Biosciences	2.13	9.95	0.009765	0.588	40475580	38789766	30646582	11254837	9795226	4.08593	2.16901	5701650	5115756	4831403	2002069	1900183	1.36424	0.961646
NCC0013	55	Male	Cambridge Biosciences	6.41	25	0.01023	0.456	22847130	22102045	15404905	5880646	5278583	3.61589	1.99718	2806400	2518858	2263021	936340	905319	1.34476	0.992647
NCC0014	55	Male	Cambridge Biosciences	10.97	25	0.01491	0.696	223582936	202266487	133626795	51436086	46653367	2.78513	1.76362	7994248	6645576	5882659	2440438	2364199	1.89508	1.18846
NCC0015	58	Male	Cambridge Biosciences	2.82	13.18	0.01597	0.383	25108876	23561749	16120921	5936484	5321683	2.93724	1.80536	4640602	3242650	2928098	1210377	1169005	1.06702	0.908986
NCC0016	61	Female	Cambridge Biosciences	5.24	24.47	0.0138	0.486	40127674	37997878	25674248	9724196	8602214	3.02363	1.81184	5117908	3995220	3611498	1492679	1412162	1.18427	0.948592
NCC0017	56	Male	Cambridge Biosciences	7.46	25	0.00937	0.597	88847042	86129780	66049945	24353886	21497686	3.92898	2.14519	10235946	9754773	9192666	3831247	3704936	1.35989	0.969161
NCC0018	62	Male	Cambridge Biosciences	5.55	25	0.01003	0.64	99011568	94839936	73565721	27281002	24172563	3.99068	2.14044	14658330	13207846	12388896	5094688	4929578	1.38551	0.967313
NCC0019	63	Male	Cambridge Biosciences	3.72	17.37	0.009861	0.668	25230144	24516168	20939462	8079440	7292746	3.90151	2.01778	2312330	2249310	2140878	941373	911251	1.37198	0.975181
NCC0020	55	Female	Cambridge Biosciences	4.23	19.74	0.006632	0.746	48126394	46173733	39388557	14999754	13234285	4.28416	2.18169	5848812	5596333	5271584	2293499	2172581	1.31561	0.956827
NCC0021	56	Male	Cambridge Biosciences	2.94	13.72	0.007597	0.673	22569016	21266515	18060661	6505043	5736898	4.29093	2.19061	2413468	2294249	2156298	923535	892673	1.33926	0.970782
NCC0022	62	Female	Cambridge Biosciences	3.29	15.37	0.008651	0.7	44596954	40093629	33035629	12296103	10965492	3.89581	2.08199	2864190	2632700	2415670	1012352	962195	1.51862	1.01312
NCC0023	56	Female	Cambridge Biosciences	3.39	15.83	0.006047	0.696	30046346	27880085	23702152	8407431	7369238	4.54522	2.24165	2875460	2679625	2495771	1034565	981060	1.40667	0.989698
NCC0024	64	Female	Cambridge Biosciences	3.39	15.83	0.01323	0.703	39451226	36504448	31091140	10809337	9538322	4.06473	2.11672	3360508	3054545	2829259	1138339	1080051	1.43769	0.996714
NCC0025	59	Female	Cambridge Biosciences	6.56	25	0.01046	0.707	44237430	40341714	34328896	12089303	10680924	4.23307	2.15861	3817706	3498493	3255742	1329257	1269736	1.42668	0.99668
NCC0026	64	Male	Cambridge Biosciences	2.58	12.02	0.01359	0.636	17235564	15439828	13349824	4611220	4050352	4.79679	2.35316	1985022	1735228	1626574	644866	623911	1.37978	0.987476
NCC0027	56	Male	Cambridge Biosciences	5.01	23.38	0.009577	0.698	30286402	29083053	24329060	8908584	7893137	4.14491	2.15275	3488190	3375604	3177949	1373111	1327906	1.30634	0.960496
NCC0028	56	Female	Cambridge Biosciences	2.65	12.39	0.00767	0.68	31788636	30618198	26012323	9691640	8549680	3.51688	1.96749	2468158	2347042	2204773	949713	900831	1.34863	0.9773
NCC0029	60	Female	Cambridge Biosciences	2.73	12.75	0.007592	0.661	22024002	21045872	17950924	6597027	5795609	4.26215	2.17022	2429206	2326308	2188053	955271	906311	1.38649	0.978744
NCC0030	61	Male	Cambridge Biosciences	6.01	25	0.00452	0.712	35054492	33589342	28614762	10537000	9321221	4.53266	2.22579	3365736	3227743	3027808	1296228	1254234	1.46154	1.00596
NCC0031	60	Female	Cambridge Biosciences	7.1	25	0.007834	0.751	64806382	61478245	51701788	19248078	16890453	4.53623	2.23732	7251890	6890264	6432157	2788944	2646074	1.38073	0.973873
NCC0032	58	Female	Cambridge Biosciences	5.29	24.7	0.005851	0.749	49497338	46140706	38775795	13720921	12066142	4.44973	2.21802	4855188	4565428	4228090	1749897	1659510	1.39458	0.982806
NCC0033	58	Female	Cambridge Biosciences	7.4	25	0.0072	0.726	39978350	37768196	31995284	11449001	10039514	4.58513	2.2581	4139528	3914437	3647454	1528166	1450617	1.4583	0.996537
NCC0034	55	Male	Cambridge Biosciences	6.14	25	0.01386	0.707	36841792	34848847	29795208	10460995	9327353	4.52053	2.23552	3270948	3092474	2893865	1204294	1166192	1.50725	1.01425
NCC0035	58	Male	Community Lung Health Study	2.77	6.1	0.003962	0.765	40317956	38284152	30709226	11103355	9982710	4.34415	2.12553	3632296	3285052	2979349	1241097	1201233	1.6211	1.0119
NCC0036	58	Male	Community Lung Health Study	1.29	3	0.01006	0.839	94506038	88765192	68884300	25744910	23350356	4.4156	2.14689	7963914	6786646	6164935	2521995	2441041	1.56046	0.970277
NCC0037	69	Male	Community Lung Health Study	0.83	1.9	0.00826	0.74	21606942	19954056	15934451	6058871	5499166	4.26079	2.1112	2060688	1354541	1227889	501624	486239	1.57252	0.980692
NCC0038	68	Male	Community Lung Health Study	6.08	13.9	0.01285	0.802	25783624	23676399	20335698	7283368	6457234	4.43692	2.17662	3868902	2732844	2513123	915941	884640	1.36113	0.92398
NCC0039	69	Male	Community Lung Health Study	6.75	21	0.003809	0.839	58025684	53026337	45127117	15982076	14138123	4.8235	2.27481	7534730	5796495	5329964	1978794	1912343	1.47472	0.949884
NCC0040	59	Male	Community Lung Health Study	2.42	5.5	0.003547	0.82	76930626	71422328	55993809	21277230	19261266	4.6431	2.2126	5653030	5019835	4559635	1924463	1865281	1.59463	0.983866
NCC0041	67	Female	Community Lung Health Study	5.71	17.8	0.007579	0.827	40930578	38018786	32531531	11574737	10174743	4.79026	2.24093	4646414	3776089	3474078	1299548	1233174	1.52916	0.96434
NCC0042	57	Male	Community Lung Health Study	0.81	1.8	0.00635	0.737	23434502	22377119	17692151	6282925	5555339	4.81294	2.28411	2014486	1807074	1650743	661925	640551	1.50219	0.961605
NCC0043	64	Male	Community Lung Health Study	3.78	11.5	0.007024	0.814	54706010	50558294	41889743	15291924	13637796	4.51791	2.19055	4046670	3604817	3316536	1334279	1286401	1.40542	0.961861
NCC0044	63	Male	Community Lung Health Study	1.69	3.8	0.008416	0.797	48456608	45773166	35861341	13204417	11829760	4.04067	2.07813	3881566	3466205	3160986	1247569	1207043	1.36834	0.93436
NCC0045	68	Female	Community Lung Health Study	0.89	2.1	0.007252	0.769	38291558	36692363	29112016	10483517	9139049	4.43324	2.20597	3845062	3525861	3232237	1304985	1235874	1.35219	0.928227
NCC0046	72	Male	Community Lung Health Study	3.6	8.4	0.006427	0.807	51516182	48814042	39205164	14240647	12814242	4.20848	2.07984	4199116	3786476	3429247	1451218	1396235	1.70803	1.04372
NCC0047	72	Male	Community Lung Health Study	1.43	3.2	0.008391	0.823	56155040	52034677	41566312	14777949	13140396	4.14606	2.12097	4575578	4026419	3687443	1472332	1422029	1.33307	0.931757
NCC0048	67	Female	Community Lung Health Study	1.14	2.6	0.005356	0.802	37429534	34819948	27740490	10302744	9095296	4.36813	2.16882	3304000	2957427	2696169	1095528	1039668	1.46626	0.959101
NCC0049	72	Female	Community Lung Health Study	10.7	33.3	0.01395	0.843	79171650	74611843	62915505	22257636	19526494	4.90086	2.26221	7822212	6978656	6418869	2415884	2294834	1.57594	0.967769
NCC0050	73	Male	Community Lung Health Study	4.92	15.3	0.004812	0.807	63368456	58304051	47818307	16460927	14496771	5.0355	2.31823	5119096	4413130	4052513	1584374	1532715	1.4688	0.973709
NCC0051	73	Male	Community Lung Health Study	2.84	6.4	0.01229	0.823	54830366	51888060	41826805	14816991	13159404	4.79785	2.28656	8036410	7365148	6740499	2808839	2722870	1.43706	0.957217
NCC0052	63	Male	Community Lung Health Study	3.03	6.8	0.002294	0.797	56614604	52295371	41864740	15671965	14121556	3.94795	2.02638	4770052	4071436	3686196	1530668	1478595	1.55338	1.00308
NCC0053	70	Male	Community Lung Health Study	9.16	20.7	0.007914	0.889	128338980	119256852	101929451	37341107	33570775	4.14187	2.09831	10505888	9204557	8491634	3265930	3164353	1.53305	0.958004
NCC0054	73	Female	Community Lung Health Study	7.85	24.4	0.01102	0.837	64105540	59946343	51323186	18876885	16640855	4.8878	2.24614	6406036	5453454	5013566	1962890	1865810	1.66871	0.992919
NCC0055	70	Male	Community Lung Health Study	2.75	8.6	0.01071	0.818	51608304	48819278	39141787	14231659	12704871	4.31776	2.14612	6518132	5663646	5153302	2132152	2060988	1.41874	0.958661
NCC0056	69	Female	Community Lung Health Study	2.8	7.4	0.006187	0.799	58780966	55925763	44934473	16536509	14499093	4.47301	2.18703	6308910	5708443	5183046	2179323	2064057	1.5447	0.993037
NCC0057	56	Male	Community Lung Health Study	6.58	15.1	0.007449	0.813	47060738	44610020	37032711	13119777	11634247	4.34949	2.14978	3403942	3095837	2839354	1128849	1091230	1.41599	0.961807
NCC0058	73	Female	Community Lung Health Study	0.84	1.9	0.01169	0.661	20023062	18720799	14857168	5678403	5064683	4.32398	2.12419	1529500	1194175	1086015	444868	422815	1.53822	0.971476
NCC0059	61	Female	Community Lung Health Study	3.24	7.5	0.01524	0.802	46530026	43791929	34945945	12930790	11458684	4.6029	2.18029	4614414	4090131	3695994	1567122	1488280	1.65942	1.01872
NCC0060	57	Female	Community Lung Health Study	3.36	8.1	0.006557	0.802	54961692	51742263	41761571	15541649	13799575	4.43059	2.14634	5181528	4609652	4182192	1792000	1696370	1.66103	1.02445
NCC0061	59	Male	Community Lung Health Study	6.49	14.6	0.0063	0.829	97763600	92715083	76766933	26444558	23168535	5.0432	2.36148	9559860	8845389	8156894	3226557	3119672	1.37313	0.952146
NCC0062	58	Male	Community Lung Health Study	2.5	5.8	0.005155	0.848	137651906	127779533	100357758	38142382	34395318	3.92098	2.05343	10269852	9341794	8532852	3443112	3330449	1.43223	0.949381
NCC0063	73	Male	Community Lung Health Study	1.64	3.7	0.005139	0.823	66432220	60856730	48106921	17886355	16059249	3.83895	2.052	4920106	4279475	3910490	1567296	1515373	1.36384	0.935851
NCC0064	59	Female	Community Lung Health Study	1.2	2.8	0.009053	0.802	52977438	48854656	38665748	14160591	12411692	4.3212	2.17692	5298796	4499015	4115356	1618521	1534422	1.37679	0.933929
NCC0065	64	Female	Community Lung Health Study	4.64	11.2	0.005604	0.793	45570686	43039405	35280935	11914636	10318180	5.09757	2.32111	3532878	3067659	2816533	1124152	1068021	1.5171	0.98606
NCC0066	64	Female	Community Lung Health Study	7.8	18.2	0.008751	0.832	45388274	41477780	35663389	12487005	10963425	4.64043	2.19118	4212486	3375005	3106653	1183470	1124109	1.58971	0.974785
NCC0067	73	Male	Community Lung Health Study	3.06	6.9	0.005583	0.802	37527806	35752413	28659243	10479690	9331830	4.99044	2.31831	5212968	4798501	4372468	1877787	1822270	1.54592	0.983797
NCC0068	69	Female	Community Lung Health Study	2.29	7.1	0.006564	0.814	49358740	46692241	37222412	13324612	11653276	4.4366	2.18254	6361910	5544834	5041124	2059734	1950322	1.38482	0.956444
NCC0069	69	Male	Community Lung Health Study	1.12	2.5	0.007979	0.799	59724270	53546027	42325789	15929546	14363874	4.3173	2.14739	4424428	3740022	3408412	1378391	1334128	1.49834	0.964503
NCC0070	69	Female	Community Lung Health Study	2.37	5.2	0.01404	0.832	55669178	52138004	40834708	15419855	13742203	4.6547	2.21187	4459794	3885651	3519333	1407265	1337599	1.56052	0.977895
NCC0071	58	Male	Community Lung Health Study	1.58	3.7	0.00463	0.834	86843560	81257641	64730928	23768816	21288535	4.3201	2.16728	8441364	7564727	6920773	2719529	2629879	1.3877	0.93635
NCC0072	67	Female	Community Lung Health Study	2.84	6.6	0.007327	0.814	59989750	54854208	43809429	16381899	14534379	3.97873	2.03159	4906060	4254817	3854118	1616390	1530221	1.60956	1.0118
NCC0073	59	Female	Community Lung Health Study	1.79	4.2	0.007308	0.814	53093258	49261827	38902243	14493536	12747616	4.38805	2.1772	4692468	3831314	3477283	1375619	1304681	1.456	0.965261
NCC0074	69	Female	Community Lung Health Study	2.62	5.5	0.004602	0.825	63567270	59666336	46824022	17229379	15124008	4.55376	2.23216	5687330	4968202	4526058	1830816	1736709	1.45024	0.951942
NCC0075	64	Female	Community Lung Health Study	1.96	4.4	0.009622	0.818	69754636	64655906	51366521	18768392	16516666	4.05049	2.11091	5634676	4951160	4528865	1801732	1708085	1.32143	0.923226
NCC0076	72	Female	Community Lung Health Study	5.33	16.6	0.008551	0.834	42786272	40039195	34103433	12442575	10916870	5.1974	2.31711	4777746	3997348	3672465	1428470	1357793	1.64141	0.983837
NCC0077	64	Female	Community Lung Health Study	1.2	2.8	0.008659	0.769	28871922	25502806	20490595	7672766	6760560	4.7068	2.2602	2691684	2202103	2013350	819109	777278	1.42382	0.946198
NCC0078	59	Male	Community Lung Health Study	2	4.5	0.006208	0.804	58894670	53562257	42645990	15576383	13913409	4.47502	2.21657	5488168	4640576	4222283	1676417	1621795	1.41426	0.944043
NCC0079	69	Female	Community Lung Health Study	5.49	12.8	0.01117	0.777	40308872	37597681	31507050	11544164	10108858	4.2344	2.12448	2808202	2429501	2233727	890464	844603	1.37629	0.956017
