# Supplementary material for: CUPiD: A cfDNA methylation-based tissue-of-origin classifier for Cancers of Unknown Primary
Source: Research Square preprint supplement (doi:10.21203/rs.3.rs-3758456/v1), 2023-12-26
Supplement: Supplementary file 2 [file 1ffcc376031e1ad2430844fc.xlsx]

## Sheet: ArraySamplesUsed
Supplementary Table 1: Methylation array samples used for classifier generation or reasons for exclusion
Sample Name	Source	TCGA abbreviation	TCGA histological type	CUPiD class name	Reason for not using in classifier
TCGA-05-4384-01	TCGA	LUAD	Lung Adenocarcinoma	LUAD	Used in CUPiD
TCGA-05-4390-01	TCGA	LUAD	Lung Adenocarcinoma	LUAD	Used in CUPiD
TCGA-05-4396-01	TCGA	LUAD	Lung Adenocarcinoma	LUAD	Used in CUPiD
TCGA-05-4405-01	TCGA	LUAD	Lung Adenocarcinoma	LUAD	Used in CUPiD
TCGA-05-4410-01	TCGA	LUAD	Lung Adenocarcinoma	LUAD	Used in CUPiD
TCGA-05-4415-01	TCGA	LUAD	Lung Adenocarcinoma	LUAD	Used in CUPiD
TCGA-05-4417-01	TCGA	LUAD	Lung Adenocarcinoma	LUAD	Used in CUPiD
TCGA-05-4424-01	TCGA	LUAD	Lung Adenocarcinoma	LUAD	Used in CUPiD
TCGA-05-4425-01	TCGA	LUAD	Lung Adenocarcinoma	LUAD	Used in CUPiD
TCGA-05-4427-01	TCGA	LUAD	Lung Adenocarcinoma	LUAD	Used in CUPiD
TCGA-05-4433-01	TCGA	LUAD	Lung Adenocarcinoma	LUAD	Used in CUPiD
TCGA-05-5423-01	TCGA	LUAD	Lung Adenocarcinoma	LUAD	Used in CUPiD
TCGA-05-5425-01	TCGA	LUAD	Lung Adenocarcinoma	LUAD	Used in CUPiD
TCGA-05-5428-01	TCGA	LUAD	Lung Adenocarcinoma	LUAD	Used in CUPiD
TCGA-05-5429-01	TCGA	LUAD	Lung Adenocarcinoma	LUAD	Used in CUPiD
TCGA-05-5715-01	TCGA	LUAD	Lung Adenocarcinoma	LUAD	Used in CUPiD
TCGA-06-0125-01	TCGA	GBM	Untreated primary (de novo) GBM	GBM	Used in CUPiD
TCGA-06-0125-02	TCGA	GBM	Untreated primary (de novo) GBM	NotUsed	Recurrent Tumour
TCGA-06-0152-01	TCGA	GBM	Untreated primary (de novo) GBM	GBM	Used in CUPiD
TCGA-06-0152-02	TCGA	GBM	Untreated primary (de novo) GBM	NotUsed	Recurrent Tumour
TCGA-06-0171-01	TCGA	GBM	Untreated primary (de novo) GBM	GBM	Used in CUPiD
TCGA-06-0171-02	TCGA	GBM	Untreated primary (de novo) GBM	NotUsed	Recurrent Tumour
TCGA-06-0190-01	TCGA	GBM	Untreated primary (de novo) GBM	GBM	Used in CUPiD
TCGA-06-0190-02	TCGA	GBM	Untreated primary (de novo) GBM	NotUsed	Recurrent Tumour
TCGA-06-0210-01	TCGA	GBM	Untreated primary (de novo) GBM	GBM	Used in CUPiD
TCGA-06-0210-02	TCGA	GBM	Untreated primary (de novo) GBM	NotUsed	Recurrent Tumour
TCGA-06-0211-01	TCGA	GBM	Untreated primary (de novo) GBM	GBM	Used in CUPiD
TCGA-06-0211-02	TCGA	GBM	Untreated primary (de novo) GBM	NotUsed	Recurrent Tumour
TCGA-06-0221-01	TCGA	GBM	Untreated primary (de novo) GBM	GBM	Used in CUPiD
TCGA-06-0221-02	TCGA	GBM	Untreated primary (de novo) GBM	NotUsed	Recurrent Tumour
TCGA-06-0650-01	TCGA	GBM	Untreated primary (de novo) GBM	GBM	Used in CUPiD
TCGA-06-1804-01	TCGA	GBM	Untreated primary (de novo) GBM	GBM	Used in CUPiD
TCGA-06-1806-01	TCGA	GBM	Glioblastoma Multiforme (GBM)	GBM	Used in CUPiD
TCGA-06-5408-01	TCGA	GBM	Untreated primary (de novo) GBM	GBM	Used in CUPiD
TCGA-06-5410-01	TCGA	GBM	Untreated primary (de novo) GBM	GBM	Used in CUPiD
TCGA-06-5411-01	TCGA	GBM	Untreated primary (de novo) GBM	GBM	Used in CUPiD
TCGA-06-5412-01	TCGA	GBM	Untreated primary (de novo) GBM	GBM	Used in CUPiD
TCGA-06-5413-01	TCGA	GBM	Untreated primary (de novo) GBM	GBM	Used in CUPiD
TCGA-06-5414-01	TCGA	GBM	Untreated primary (de novo) GBM	GBM	Used in CUPiD
TCGA-06-5415-01	TCGA	GBM	Untreated primary (de novo) GBM	GBM	Used in CUPiD
TCGA-06-5416-01	TCGA	GBM	Untreated primary (de novo) GBM	GBM	Used in CUPiD
TCGA-06-5417-01	TCGA	GBM	Untreated primary (de novo) GBM	GBM	Used in CUPiD
TCGA-06-5418-01	TCGA	GBM	Untreated primary (de novo) GBM	GBM	Used in CUPiD
TCGA-06-5856-01	TCGA	GBM	Untreated primary (de novo) GBM	GBM	Used in CUPiD
TCGA-06-5858-01	TCGA	GBM	Untreated primary (de novo) GBM	GBM	Used in CUPiD
TCGA-06-5859-01	TCGA	GBM	Untreated primary (de novo) GBM	GBM	Used in CUPiD
TCGA-06-6388-01	TCGA	GBM	Untreated primary (de novo) GBM	GBM	Used in CUPiD
TCGA-06-6389-01	TCGA	GBM	Untreated primary (de novo) GBM	GBM	Used in CUPiD
TCGA-06-6390-01	TCGA	GBM	Untreated primary (de novo) GBM	GBM	Used in CUPiD
TCGA-06-6693-01	TCGA	GBM	Untreated primary (de novo) GBM	GBM	Used in CUPiD
TCGA-06-6694-01	TCGA	GBM	Untreated primary (de novo) GBM	GBM	Used in CUPiD
TCGA-06-6695-01	TCGA	GBM	Untreated primary (de novo) GBM	GBM	Used in CUPiD
TCGA-06-6697-01	TCGA	GBM	Untreated primary (de novo) GBM	GBM	Used in CUPiD
TCGA-06-6698-01	TCGA	GBM	Untreated primary (de novo) GBM	GBM	Used in CUPiD
TCGA-06-6699-01	TCGA	GBM	Untreated primary (de novo) GBM	GBM	Used in CUPiD
TCGA-06-6700-01	TCGA	GBM	Untreated primary (de novo) GBM	GBM	Used in CUPiD
TCGA-06-6701-01	TCGA	GBM	Untreated primary (de novo) GBM	GBM	Used in CUPiD
TCGA-06-A5U0-01	TCGA	GBM	Glioblastoma Multiforme (GBM)	GBM	Used in CUPiD
TCGA-06-A5U1-01	TCGA	GBM	Glioblastoma Multiforme (GBM)	GBM	Used in CUPiD
TCGA-06-A6S0-01	TCGA	GBM	Glioblastoma Multiforme (GBM)	GBM	Used in CUPiD
TCGA-06-A6S1-01	TCGA	GBM	Glioblastoma Multiforme (GBM)	GBM	Used in CUPiD
TCGA-06-A7TK-01	TCGA	GBM	Glioblastoma Multiforme (GBM)	GBM	Used in CUPiD
TCGA-06-A7TL-01	TCGA	GBM	Glioblastoma Multiforme (GBM)	GBM	Used in CUPiD
TCGA-06-AABW-11	TCGA	GBM	NA	Normal Tissue	Adjacent Normal
TCGA-12-5295-01	TCGA	GBM	Untreated primary (de novo) GBM	GBM	Used in CUPiD
TCGA-12-5299-01	TCGA	GBM	Untreated primary (de novo) GBM	GBM	Used in CUPiD
TCGA-12-5301-01	TCGA	GBM	Untreated primary (de novo) GBM	GBM	Used in CUPiD
TCGA-13-A5FT-01	TCGA	OV	Serous Cystadenocarcinoma	Gynae	Used in CUPiD
TCGA-13-A5FU-01	TCGA	OV	Serous Cystadenocarcinoma	Gynae	Used in CUPiD
TCGA-14-0736-01	TCGA	GBM	Untreated primary (de novo) GBM	GBM	Used in CUPiD
TCGA-14-0736-02	TCGA	GBM	Untreated primary (de novo) GBM	NotUsed	Recurrent Tumour
TCGA-14-0740-01	TCGA	GBM	Untreated primary (de novo) GBM	GBM	Used in CUPiD
TCGA-14-0781-01	TCGA	GBM	Untreated primary (de novo) GBM	GBM	Used in CUPiD
TCGA-14-0862-01	TCGA	GBM	Untreated primary (de novo) GBM	GBM	Used in CUPiD
TCGA-14-1034-02	TCGA	GBM	Untreated primary (de novo) GBM	NotUsed	Recurrent Tumour
TCGA-14-1043-01	TCGA	GBM	Untreated primary (de novo) GBM	GBM	Used in CUPiD
TCGA-14-1395-01	TCGA	GBM	Untreated primary (de novo) GBM	GBM	Used in CUPiD
TCGA-14-1402-01	TCGA	GBM	Untreated primary (de novo) GBM	GBM	Used in CUPiD
TCGA-14-1402-02	TCGA	GBM	Untreated primary (de novo) GBM	NotUsed	Recurrent Tumour
TCGA-14-1450-01	TCGA	GBM	Untreated primary (de novo) GBM	GBM	Used in CUPiD
TCGA-15-1444-01	TCGA	GBM	Glioblastoma Multiforme (GBM)	GBM	Used in CUPiD
TCGA-18-3417-01	TCGA	LUSC	Lung Squamous Cell Carcinoma	LUSC	Used in CUPiD
TCGA-18-3417-11	TCGA	LUSC	Lung Squamous Cell Carcinoma	Normal Tissue	Adjacent Normal
TCGA-18-4721-01	TCGA	LUSC	Lung Squamous Cell Carcinoma	LUSC	Used in CUPiD
TCGA-18-4721-11	TCGA	LUSC	Lung Squamous Cell Carcinoma	Normal Tissue	Adjacent Normal
TCGA-18-5592-01	TCGA	LUSC	Lung Squamous Cell Carcinoma	LUSC	Used in CUPiD
TCGA-18-5592-11	TCGA	LUSC	Lung Squamous Cell Carcinoma	Normal Tissue	Adjacent Normal
TCGA-19-0957-01	TCGA	GBM	Untreated primary (de novo) GBM	GBM	Used in CUPiD
TCGA-19-0957-02	TCGA	GBM	Untreated primary (de novo) GBM	NotUsed	Recurrent Tumour
TCGA-19-1389-01	TCGA	GBM	Untreated primary (de novo) GBM	GBM	Used in CUPiD
TCGA-19-1389-02	TCGA	GBM	Untreated primary (de novo) GBM	NotUsed	Recurrent Tumour
TCGA-19-4065-01	TCGA	GBM	Untreated primary (de novo) GBM	GBM	Used in CUPiD
TCGA-19-4065-02	TCGA	GBM	Untreated primary (de novo) GBM	NotUsed	Recurrent Tumour
TCGA-19-5947-01	TCGA	GBM	Untreated primary (de novo) GBM	GBM	Used in CUPiD
TCGA-19-5950-01	TCGA	GBM	Untreated primary (de novo) GBM	GBM	Used in CUPiD
TCGA-19-5951-01	TCGA	GBM	Untreated primary (de novo) GBM	GBM	Used in CUPiD
TCGA-19-5952-01	TCGA	GBM	Untreated primary (de novo) GBM	GBM	Used in CUPiD
TCGA-19-5953-01	TCGA	GBM	Untreated primary (de novo) GBM	GBM	Used in CUPiD
TCGA-19-5954-01	TCGA	GBM	Untreated primary (de novo) GBM	GBM	Used in CUPiD
TCGA-19-5955-01	TCGA	GBM	Untreated primary (de novo) GBM	GBM	Used in CUPiD
TCGA-19-5956-01	TCGA	GBM	Untreated primary (de novo) GBM	GBM	Used in CUPiD
TCGA-19-5958-01	TCGA	GBM	Untreated primary (de novo) GBM	GBM	Used in CUPiD
TCGA-19-5959-01	TCGA	GBM	Untreated primary (de novo) GBM	GBM	Used in CUPiD
TCGA-19-5960-01	TCGA	GBM	Untreated primary (de novo) GBM	GBM	Used in CUPiD
TCGA-19-A60I-01	TCGA	GBM	Glioblastoma Multiforme (GBM)	GBM	Used in CUPiD
TCGA-19-A6J4-01	TCGA	GBM	Glioblastoma Multiforme (GBM)	GBM	Used in CUPiD
TCGA-19-A6J5-01	TCGA	GBM	Glioblastoma Multiforme (GBM)	GBM	Used in CUPiD
TCGA-21-5782-01	TCGA	LUSC	Lung Squamous Cell Carcinoma	LUSC	Used in CUPiD
TCGA-21-5783-01	TCGA	LUSC	Lung Squamous Cell Carcinoma	LUSC	Used in CUPiD
TCGA-21-5784-01	TCGA	LUSC	Lung Squamous Cell Carcinoma	LUSC	Used in CUPiD
TCGA-21-5786-01	TCGA	LUSC	Lung Squamous Cell Carcinoma	LUSC	Used in CUPiD
TCGA-21-5787-01	TCGA	LUSC	Lung Squamous Cell Carcinoma	LUSC	Used in CUPiD
TCGA-22-4593-01	TCGA	LUSC	Lung Squamous Cell Carcinoma	LUSC	Used in CUPiD
TCGA-22-4599-01	TCGA	LUSC	Lung Squamous Cell Carcinoma	LUSC	Used in CUPiD
TCGA-22-4599-11	TCGA	LUSC	Lung Squamous Cell Carcinoma	Normal Tissue	Adjacent Normal
TCGA-22-4601-01	TCGA	LUSC	Lung Squamous Cell Carcinoma	LUSC	Used in CUPiD
TCGA-22-4601-11	TCGA	LUSC	Lung Squamous Cell Carcinoma	Normal Tissue	Adjacent Normal
TCGA-22-4605-01	TCGA	LUSC	Lung Squamous Cell Carcinoma	LUSC	Used in CUPiD
TCGA-22-4609-01	TCGA	LUSC	Lung Squamous Cell Carcinoma	LUSC	Used in CUPiD
TCGA-22-4613-01	TCGA	LUSC	Lung Squamous Cell Carcinoma	LUSC	Used in CUPiD
TCGA-22-4613-11	TCGA	LUSC	Lung Squamous Cell Carcinoma	Normal Tissue	Adjacent Normal
TCGA-22-5471-01	TCGA	LUSC	Lung Squamous Cell Carcinoma	LUSC	Used in CUPiD
TCGA-22-5471-11	TCGA	LUSC	Lung Squamous Cell Carcinoma	Normal Tissue	Adjacent Normal
TCGA-22-5472-01	TCGA	LUSC	Lung Squamous Cell Carcinoma	LUSC	Used in CUPiD
TCGA-22-5472-11	TCGA	LUSC	Lung Squamous Cell Carcinoma	Normal Tissue	Adjacent Normal
TCGA-22-5473-01	TCGA	LUSC	Lung Squamous Cell Carcinoma	LUSC	Used in CUPiD
TCGA-22-5473-11	TCGA	LUSC	Lung Squamous Cell Carcinoma	Normal Tissue	Adjacent Normal
TCGA-22-5474-01	TCGA	LUSC	Lung Squamous Cell Carcinoma	LUSC	Used in CUPiD
TCGA-22-5474-11	TCGA	LUSC	Lung Squamous Cell Carcinoma	Normal Tissue	Adjacent Normal
TCGA-22-5477-01	TCGA	LUSC	Lung Squamous Cell Carcinoma	LUSC	Used in CUPiD
TCGA-22-5477-11	TCGA	LUSC	Lung Squamous Cell Carcinoma	Normal Tissue	Adjacent Normal
TCGA-22-5478-01	TCGA	LUSC	Lung Squamous Cell Carcinoma	LUSC	Used in CUPiD
TCGA-22-5478-11	TCGA	LUSC	Lung Squamous Cell Carcinoma	Normal Tissue	Adjacent Normal
TCGA-22-5479-01	TCGA	LUSC	Lung Squamous Cell Carcinoma	LUSC	Used in CUPiD
TCGA-22-5480-01	TCGA	LUSC	Lung Squamous Cell Carcinoma	LUSC	Used in CUPiD
TCGA-22-5480-11	TCGA	LUSC	Lung Squamous Cell Carcinoma	Normal Tissue	Adjacent Normal
TCGA-22-5481-01	TCGA	LUSC	Lung Squamous Cell Carcinoma	LUSC	Used in CUPiD
TCGA-22-5482-01	TCGA	LUSC	Lung Squamous Cell Carcinoma	LUSC	Used in CUPiD
TCGA-22-5482-11	TCGA	LUSC	Lung Squamous Cell Carcinoma	Normal Tissue	Adjacent Normal
TCGA-22-5483-01	TCGA	LUSC	Lung Squamous Cell Carcinoma	LUSC	Used in CUPiD
TCGA-22-5485-01	TCGA	LUSC	Lung Squamous Cell Carcinoma	LUSC	Used in CUPiD
TCGA-22-5485-11	TCGA	LUSC	Lung Squamous Cell Carcinoma	Normal Tissue	Adjacent Normal
TCGA-22-5489-01	TCGA	LUSC	Lung Squamous Cell Carcinoma	LUSC	Used in CUPiD
TCGA-22-5489-11	TCGA	LUSC	Lung Squamous Cell Carcinoma	Normal Tissue	Adjacent Normal
TCGA-22-5491-01	TCGA	LUSC	Lung Squamous Cell Carcinoma	LUSC	Used in CUPiD
TCGA-22-5491-11	TCGA	LUSC	Lung Squamous Cell Carcinoma	Normal Tissue	Adjacent Normal
TCGA-22-5492-01	TCGA	LUSC	Lung Squamous Cell Carcinoma	LUSC	Used in CUPiD
TCGA-22-5492-11	TCGA	LUSC	Lung Squamous Cell Carcinoma	Normal Tissue	Adjacent Normal
TCGA-22-A5C4-01	TCGA	LUSC	Lung Squamous Cell Carcinoma	LUSC	Used in CUPiD
TCGA-26-1442-01	TCGA	GBM	Untreated primary (de novo) GBM	GBM	Used in CUPiD
TCGA-26-5132-01	TCGA	GBM	Untreated primary (de novo) GBM	GBM	Used in CUPiD
TCGA-26-5133-01	TCGA	GBM	Untreated primary (de novo) GBM	GBM	Used in CUPiD
TCGA-26-5134-01	TCGA	GBM	Untreated primary (de novo) GBM	GBM	Used in CUPiD
TCGA-26-5135-01	TCGA	GBM	Untreated primary (de novo) GBM	GBM	Used in CUPiD
TCGA-26-5136-01	TCGA	GBM	Untreated primary (de novo) GBM	GBM	Used in CUPiD
TCGA-26-5139-01	TCGA	GBM	Untreated primary (de novo) GBM	GBM	Used in CUPiD
TCGA-26-6173-01	TCGA	GBM	Untreated primary (de novo) GBM	GBM	Used in CUPiD
TCGA-26-6174-01	TCGA	GBM	Untreated primary (de novo) GBM	GBM	Used in CUPiD
TCGA-26-A7UX-01	TCGA	GBM	Glioblastoma Multiforme (GBM)	GBM	Used in CUPiD
TCGA-28-2501-01	TCGA	GBM	NA	GBM	Used in CUPiD
TCGA-28-2510-01	TCGA	GBM	NA	GBM	Used in CUPiD
TCGA-28-5204-01	TCGA	GBM	Untreated primary (de novo) GBM	GBM	Used in CUPiD
TCGA-28-5207-01	TCGA	GBM	Untreated primary (de novo) GBM	GBM	Used in CUPiD
TCGA-28-5208-01	TCGA	GBM	Untreated primary (de novo) GBM	GBM	Used in CUPiD
TCGA-28-5209-01	TCGA	GBM	Untreated primary (de novo) GBM	GBM	Used in CUPiD
TCGA-28-5211-01	TCGA	GBM	Untreated primary (de novo) GBM	GBM	Used in CUPiD
TCGA-28-5213-01	TCGA	GBM	Untreated primary (de novo) GBM	GBM	Used in CUPiD
TCGA-28-5214-01	TCGA	GBM	Untreated primary (de novo) GBM	GBM	Used in CUPiD
TCGA-28-5215-01	TCGA	GBM	Untreated primary (de novo) GBM	GBM	Used in CUPiD
TCGA-28-5216-01	TCGA	GBM	Untreated primary (de novo) GBM	GBM	Used in CUPiD
TCGA-28-5218-01	TCGA	GBM	Untreated primary (de novo) GBM	GBM	Used in CUPiD
TCGA-28-5219-01	TCGA	GBM	Untreated primary (de novo) GBM	GBM	Used in CUPiD
TCGA-28-5220-01	TCGA	GBM	Untreated primary (de novo) GBM	GBM	Used in CUPiD
TCGA-28-6450-01	TCGA	GBM	Untreated primary (de novo) GBM	GBM	Used in CUPiD
TCGA-29-A5NZ-01	TCGA	OV	Serous Cystadenocarcinoma	Gynae	Used in CUPiD
TCGA-2A-A8VL-01	TCGA	PRAD	Prostate Adenocarcinoma Acinar Type	PRAD	Used in CUPiD
TCGA-2A-A8VO-01	TCGA	PRAD	Prostate Adenocarcinoma Acinar Type	PRAD	Used in CUPiD
TCGA-2A-A8VT-01	TCGA	PRAD	Prostate Adenocarcinoma Acinar Type	PRAD	Used in CUPiD
TCGA-2A-A8VV-01	TCGA	PRAD	Prostate Adenocarcinoma Acinar Type	PRAD	Used in CUPiD
TCGA-2A-A8VX-01	TCGA	PRAD	Prostate Adenocarcinoma Acinar Type	PRAD	Used in CUPiD
TCGA-2A-A8W1-01	TCGA	PRAD	Prostate Adenocarcinoma Acinar Type	PRAD	Used in CUPiD
TCGA-2A-A8W3-01	TCGA	PRAD	Prostate Adenocarcinoma Acinar Type	PRAD	Used in CUPiD
TCGA-2A-AAYF-01	TCGA	PRAD	Prostate Adenocarcinoma Acinar Type	PRAD	Used in CUPiD
TCGA-2A-AAYO-01	TCGA	PRAD	Prostate Adenocarcinoma Acinar Type	PRAD	Used in CUPiD
TCGA-2A-AAYU-01	TCGA	PRAD	Prostate Adenocarcinoma Acinar Type	PRAD	Used in CUPiD
TCGA-2E-A9G8-01	TCGA	UCEC	Endometrioid endometrial adenocarcinoma	Gynae	Used in CUPiD
TCGA-2F-A9KO-01	TCGA	BLCA	Muscle invasive urothelial carcinoma (pT2 or above)	BLCA	Used in CUPiD
TCGA-2F-A9KP-01	TCGA	BLCA	Muscle invasive urothelial carcinoma (pT2 or above)	BLCA	Used in CUPiD
TCGA-2F-A9KQ-01	TCGA	BLCA	Muscle invasive urothelial carcinoma (pT2 or above)	BLCA	Used in CUPiD
TCGA-2F-A9KR-01	TCGA	BLCA	Muscle invasive urothelial carcinoma (pT2 or above)	BLCA	Used in CUPiD
TCGA-2F-A9KT-01	TCGA	BLCA	Muscle invasive urothelial carcinoma (pT2 or above)	BLCA	Used in CUPiD
TCGA-2F-A9KW-01	TCGA	BLCA	Muscle invasive urothelial carcinoma (pT2 or above)	BLCA	Used in CUPiD
TCGA-2G-AAEW-01	TCGA	TGCT	Seminoma; NOS	TGCT	Used in CUPiD
TCGA-2G-AAEX-01	TCGA	TGCT	Seminoma; NOS	TGCT	Used in CUPiD
TCGA-2G-AAF1-01	TCGA	TGCT	Seminoma; NOS	TGCT	Used in CUPiD
TCGA-2G-AAF4-01	TCGA	TGCT	Seminoma; NOS	TGCT	Used in CUPiD
TCGA-2G-AAF6-01	TCGA	TGCT	Seminoma; NOS	TGCT	Used in CUPiD
TCGA-2G-AAF8-01	TCGA	TGCT	Seminoma; NOS	TGCT	Used in CUPiD
TCGA-2G-AAFG-01	TCGA	TGCT	Seminoma; NOS	TGCT	Used in CUPiD
TCGA-2G-AAFG-05	TCGA	TGCT	Seminoma; NOS	NotUsed	Additional Tumour
TCGA-2G-AAFH-01	TCGA	TGCT	Seminoma; NOS	TGCT	Used in CUPiD
TCGA-2G-AAFI-01	TCGA	TGCT	Non-Seminoma; Embryonal Carcinoma|Non-Seminoma; Yolk Sac Tumor	TGCT	Used in CUPiD
TCGA-2G-AAFJ-01	TCGA	TGCT	Non-Seminoma; Teratoma (Mature)|Non-Seminoma; Yolk Sac Tumor	TGCT	Used in CUPiD
TCGA-2G-AAFL-01	TCGA	TGCT	Non-Seminoma; Embryonal Carcinoma	TGCT	Used in CUPiD
TCGA-2G-AAFM-01	TCGA	TGCT	Non-Seminoma; Embryonal Carcinoma	TGCT	Used in CUPiD
TCGA-2G-AAFN-01	TCGA	TGCT	Non-Seminoma; Embryonal Carcinoma	TGCT	Used in CUPiD
TCGA-2G-AAFO-01	TCGA	TGCT	Non-Seminoma; Embryonal Carcinoma	TGCT	Used in CUPiD
TCGA-2G-AAFV-01	TCGA	TGCT	Non-Seminoma; Yolk Sac Tumor	TGCT	Used in CUPiD
TCGA-2G-AAFY-01	TCGA	TGCT	Non-Seminoma; Embryonal Carcinoma	TGCT	Used in CUPiD
TCGA-2G-AAFZ-01	TCGA	TGCT	Non-Seminoma; Teratoma (Immature)|Non-Seminoma; Yolk Sac Tumor|Non-Seminoma; Embryonal Carcinoma|Non-Seminoma; Teratoma (Mature)	TGCT	Used in CUPiD
TCGA-2G-AAG0-01	TCGA	TGCT	Non-Seminoma; Embryonal Carcinoma|Non-Seminoma; Yolk Sac Tumor|Non-Seminoma; Teratoma (Mature)	TGCT	Used in CUPiD
TCGA-2G-AAG3-01	TCGA	TGCT	Non-Seminoma; Teratoma (Mature)|Seminoma; NOS|Non-Seminoma; Embryonal Carcinoma|Non-Seminoma; Yolk Sac Tumor	TGCT	Used in CUPiD
TCGA-2G-AAG5-01	TCGA	TGCT	Non-Seminoma; Teratoma (Mature)	TGCT	Used in CUPiD
TCGA-2G-AAG6-01	TCGA	TGCT	Non-Seminoma; Teratoma (Mature)|Non-Seminoma; Yolk Sac Tumor	TGCT	Used in CUPiD
TCGA-2G-AAG7-01	TCGA	TGCT	Non-Seminoma; Embryonal Carcinoma|Non-Seminoma; Teratoma (Mature)|Non-Seminoma; Teratoma (Immature)|Non-Seminoma; Yolk Sac Tumor	TGCT	Used in CUPiD
TCGA-2G-AAG8-01	TCGA	TGCT	Non-Seminoma; Embryonal Carcinoma	TGCT	Used in CUPiD
TCGA-2G-AAG9-01	TCGA	TGCT	Seminoma; NOS	TGCT	Used in CUPiD
TCGA-2G-AAGA-01	TCGA	TGCT	Non-Seminoma; Embryonal Carcinoma	TGCT	Used in CUPiD
TCGA-2G-AAGC-01	TCGA	TGCT	Non-Seminoma; Teratoma (Mature)|Non-Seminoma; Teratoma (Immature)|Non-Seminoma; Embryonal Carcinoma|Non-Seminoma; Yolk Sac Tumor	TGCT	Used in CUPiD
TCGA-2G-AAGE-01	TCGA	TGCT	Non-Seminoma; Embryonal Carcinoma	TGCT	Used in CUPiD
TCGA-2G-AAGF-01	TCGA	TGCT	Non-Seminoma; Teratoma (Mature)|Non-Seminoma; Teratoma (Immature)|Non-Seminoma; Embryonal Carcinoma|Non-Seminoma; Yolk Sac Tumor	TGCT	Used in CUPiD
TCGA-2G-AAGG-01	TCGA	TGCT	Non-Seminoma; Teratoma (Mature)|Non-Seminoma; Teratoma (Immature)|Non-Seminoma; Embryonal Carcinoma|Non-Seminoma; Yolk Sac Tumor	TGCT	Used in CUPiD
TCGA-2G-AAGI-01	TCGA	TGCT	Non-Seminoma; Teratoma (Mature)|Seminoma; NOS|Non-Seminoma; Embryonal Carcinoma|Non-Seminoma; Yolk Sac Tumor	TGCT	Used in CUPiD
TCGA-2G-AAGI-05	TCGA	TGCT	Non-Seminoma; Teratoma (Mature)|Seminoma; NOS|Non-Seminoma; Embryonal Carcinoma|Non-Seminoma; Yolk Sac Tumor	NotUsed	Additional Tumour
TCGA-2G-AAGJ-01	TCGA	TGCT	Non-Seminoma; Embryonal Carcinoma|Seminoma; NOS	TGCT	Used in CUPiD
TCGA-2G-AAGK-01	TCGA	TGCT	Non-Seminoma; Yolk Sac Tumor|Non-Seminoma; Embryonal Carcinoma	TGCT	Used in CUPiD
TCGA-2G-AAGM-01	TCGA	TGCT	Non-Seminoma; Yolk Sac Tumor	TGCT	Used in CUPiD
TCGA-2G-AAGN-01	TCGA	TGCT	Non-Seminoma; Embryonal Carcinoma	TGCT	Used in CUPiD
TCGA-2G-AAGO-01	TCGA	TGCT	Non-Seminoma; Embryonal Carcinoma	TGCT	Used in CUPiD
TCGA-2G-AAGP-01	TCGA	TGCT	Non-Seminoma; Teratoma (Mature)|Non-Seminoma; Teratoma (Immature)|Non-Seminoma; Embryonal Carcinoma|Non-Seminoma; Yolk Sac Tumor	TGCT	Used in CUPiD
TCGA-2G-AAGS-01	TCGA	TGCT	Non-Seminoma; Teratoma (Immature)|Non-Seminoma; Yolk Sac Tumor	TGCT	Used in CUPiD
TCGA-2G-AAGT-01	TCGA	TGCT	Non-Seminoma; Yolk Sac Tumor|Non-Seminoma; Teratoma (Mature)	TGCT	Used in CUPiD
TCGA-2G-AAGV-01	TCGA	TGCT	Non-Seminoma; Teratoma (Mature)	TGCT	Used in CUPiD
TCGA-2G-AAGW-01	TCGA	TGCT	Non-Seminoma; Yolk Sac Tumor	TGCT	Used in CUPiD
TCGA-2G-AAGX-01	TCGA	TGCT	Non-Seminoma; Teratoma (Mature)|Non-Seminoma; Embryonal Carcinoma|Non-Seminoma; Teratoma (Immature)|Non-Seminoma; Yolk Sac Tumor	TGCT	Used in CUPiD
TCGA-2G-AAGY-01	TCGA	TGCT	Non-Seminoma; Teratoma (Mature)|Non-Seminoma; Teratoma (Immature)|Non-Seminoma; Embryonal Carcinoma	TGCT	Used in CUPiD
TCGA-2G-AAGY-05	TCGA	TGCT	Non-Seminoma; Teratoma (Mature)|Non-Seminoma; Teratoma (Immature)|Non-Seminoma; Embryonal Carcinoma	NotUsed	Additional Tumour
TCGA-2G-AAGZ-01	TCGA	TGCT	Non-Seminoma; Embryonal Carcinoma|Non-Seminoma; Teratoma (Mature)|Non-Seminoma; Choriocarcinoma|Non-Seminoma; Yolk Sac Tumor|Seminoma; NOS	TGCT	Used in CUPiD
TCGA-2G-AAH0-01	TCGA	TGCT	Seminoma; NOS|Non-Seminoma; Embryonal Carcinoma	TGCT	Used in CUPiD
TCGA-2G-AAH2-01	TCGA	TGCT	Non-Seminoma; Teratoma (Mature)|Non-Seminoma; Teratoma (Immature)|Non-Seminoma; Yolk Sac Tumor|Non-Seminoma; Embryonal Carcinoma|Seminoma; NOS	TGCT	Used in CUPiD
TCGA-2G-AAH3-01	TCGA	TGCT	Seminoma; NOS|Non-Seminoma; Teratoma (Mature)|Non-Seminoma; Teratoma (Immature)|Non-Seminoma; Yolk Sac Tumor	TGCT	Used in CUPiD
TCGA-2G-AAH4-01	TCGA	TGCT	Non-Seminoma; Yolk Sac Tumor|Non-Seminoma; Embryonal Carcinoma|Non-Seminoma; Teratoma (Mature)|Seminoma; NOS	TGCT	Used in CUPiD
TCGA-2G-AAH8-01	TCGA	TGCT	Seminoma; NOS	TGCT	Used in CUPiD
TCGA-2G-AAHA-01	TCGA	TGCT	Seminoma; NOS	TGCT	Used in CUPiD
TCGA-2G-AAHC-01	TCGA	TGCT	Seminoma; NOS	TGCT	Used in CUPiD
TCGA-2G-AAHG-01	TCGA	TGCT	Seminoma; NOS	TGCT	Used in CUPiD
TCGA-2G-AAHL-01	TCGA	TGCT	Seminoma; NOS	TGCT	Used in CUPiD
TCGA-2G-AAHN-01	TCGA	TGCT	Seminoma; NOS	TGCT	Used in CUPiD
TCGA-2G-AAHP-01	TCGA	TGCT	Seminoma; NOS	TGCT	Used in CUPiD
TCGA-2G-AAHP-05	TCGA	TGCT	Seminoma; NOS	NotUsed	Additional Tumour
TCGA-2G-AAHT-01	TCGA	TGCT	Seminoma; NOS	TGCT	Used in CUPiD
TCGA-2G-AAKD-01	TCGA	TGCT	Non-Seminoma; Embryonal Carcinoma|Non-Seminoma; Yolk Sac Tumor	TGCT	Used in CUPiD
TCGA-2G-AAKG-01	TCGA	TGCT	Non-Seminoma; Embryonal Carcinoma	TGCT	Used in CUPiD
TCGA-2G-AAKG-05	TCGA	TGCT	Non-Seminoma; Embryonal Carcinoma	NotUsed	Additional Tumour
TCGA-2G-AAKH-01	TCGA	TGCT	Non-Seminoma; Embryonal Carcinoma|Seminoma; NOS	TGCT	Used in CUPiD
TCGA-2G-AAKL-01	TCGA	TGCT	Non-Seminoma; Embryonal Carcinoma	TGCT	Used in CUPiD
TCGA-2G-AAKM-01	TCGA	TGCT	Non-Seminoma; Teratoma (Mature)|[Not Available]|Non-Seminoma; Embryonal Carcinoma|Non-Seminoma; Yolk Sac Tumor	TGCT	Used in CUPiD
TCGA-2G-AAKO-01	TCGA	TGCT	NA	TGCT	Used in CUPiD
TCGA-2G-AAKO-05	TCGA	TGCT	NA	NotUsed	Additional Tumour
TCGA-2G-AAL5-01	TCGA	TGCT	Non-Seminoma; Teratoma (Mature)|Non-Seminoma; Teratoma (Immature)|Non-Seminoma; Yolk Sac Tumor|Non-Seminoma; Embryonal Carcinoma|Seminoma; NOS	TGCT	Used in CUPiD
TCGA-2G-AAL7-01	TCGA	TGCT	Non-Seminoma; Embryonal Carcinoma|Non-Seminoma; Yolk Sac Tumor	TGCT	Used in CUPiD
TCGA-2G-AALF-01	TCGA	TGCT	NA	TGCT	Used in CUPiD
TCGA-2G-AALG-01	TCGA	TGCT	NA	TGCT	Used in CUPiD
TCGA-2G-AALN-01	TCGA	TGCT	NA	TGCT	Used in CUPiD
TCGA-2G-AALO-01	TCGA	TGCT	NA	TGCT	Used in CUPiD
TCGA-2G-AALP-01	TCGA	TGCT	Non-Seminoma; Yolk Sac Tumor|Non-Seminoma; Embryonal Carcinoma|Non-Seminoma; Teratoma (Mature)|Non-Seminoma; Teratoma (Immature)	TGCT	Used in CUPiD
TCGA-2G-AALQ-01	TCGA	TGCT	NA	TGCT	Used in CUPiD
TCGA-2G-AALR-01	TCGA	TGCT	NA	TGCT	Used in CUPiD
TCGA-2G-AALS-01	TCGA	TGCT	NA	TGCT	Used in CUPiD
TCGA-2G-AALT-01	TCGA	TGCT	NA	TGCT	Used in CUPiD
TCGA-2G-AALW-01	TCGA	TGCT	NA	TGCT	Used in CUPiD
TCGA-2G-AALX-01	TCGA	TGCT	NA	TGCT	Used in CUPiD
TCGA-2G-AALY-01	TCGA	TGCT	NA	TGCT	Used in CUPiD
TCGA-2G-AALZ-01	TCGA	TGCT	NA	TGCT	Used in CUPiD
TCGA-2G-AAM2-01	TCGA	TGCT	NA	TGCT	Used in CUPiD
TCGA-2G-AAM3-01	TCGA	TGCT	NA	TGCT	Used in CUPiD
TCGA-2G-AAM4-01	TCGA	TGCT	NA	TGCT	Used in CUPiD
TCGA-2H-A9GF-01	TCGA	ESCA	Esophagus Adenocarcinoma, NOS	UpperGI	Used in CUPiD
TCGA-2H-A9GG-01	TCGA	ESCA	Esophagus Adenocarcinoma, NOS	UpperGI	Used in CUPiD
TCGA-2H-A9GH-01	TCGA	ESCA	Esophagus Adenocarcinoma, NOS	UpperGI	Used in CUPiD
TCGA-2H-A9GI-01	TCGA	ESCA	Esophagus Adenocarcinoma, NOS	UpperGI	Used in CUPiD
TCGA-2H-A9GJ-01	TCGA	ESCA	Esophagus Adenocarcinoma, NOS	UpperGI	Used in CUPiD
TCGA-2H-A9GK-01	TCGA	ESCA	Esophagus Adenocarcinoma, NOS	UpperGI	Used in CUPiD
TCGA-2H-A9GL-01	TCGA	ESCA	Esophagus Adenocarcinoma, NOS	UpperGI	Used in CUPiD
TCGA-2H-A9GM-01	TCGA	ESCA	Esophagus Adenocarcinoma, NOS	UpperGI	Used in CUPiD
TCGA-2H-A9GN-01	TCGA	ESCA	Esophagus Adenocarcinoma, NOS	UpperGI	Used in CUPiD
TCGA-2H-A9GO-01	TCGA	ESCA	Esophagus Adenocarcinoma, NOS	UpperGI	Used in CUPiD
TCGA-2H-A9GQ-01	TCGA	ESCA	Esophagus Adenocarcinoma, NOS	UpperGI	Used in CUPiD
TCGA-2H-A9GR-01	TCGA	ESCA	Esophagus Adenocarcinoma, NOS	UpperGI	Used in CUPiD
TCGA-2J-AAB1-01	TCGA	PAAD	Pancreas-Adenocarcinoma-Other Subtype	PAAD	Used in CUPiD
TCGA-2J-AAB4-01	TCGA	PAAD	Pancreas-Adenocarcinoma-Other Subtype	PAAD	Used in CUPiD
TCGA-2J-AAB6-01	TCGA	PAAD	Pancreas-Adenocarcinoma Ductal Type	PAAD	Used in CUPiD
TCGA-2J-AAB8-01	TCGA	PAAD	Pancreas-Adenocarcinoma Ductal Type	PAAD	Used in CUPiD
TCGA-2J-AAB9-01	TCGA	PAAD	Pancreas-Adenocarcinoma Ductal Type	PAAD	Used in CUPiD
TCGA-2J-AABA-01	TCGA	PAAD	Pancreas-Adenocarcinoma Ductal Type	PAAD	Used in CUPiD
TCGA-2J-AABE-01	TCGA	PAAD	Pancreas-Adenocarcinoma Ductal Type	PAAD	Used in CUPiD
TCGA-2J-AABF-01	TCGA	PAAD	Pancreas-Adenocarcinoma Ductal Type	PAAD	Used in CUPiD
TCGA-2J-AABH-01	TCGA	PAAD	Pancreas-Adenocarcinoma-Other Subtype	PAAD	Used in CUPiD
TCGA-2J-AABI-01	TCGA	PAAD	Pancreas-Adenocarcinoma-Other Subtype	PAAD	Used in CUPiD
TCGA-2J-AABK-01	TCGA	PAAD	Pancreas-Adenocarcinoma Ductal Type	PAAD	Used in CUPiD
TCGA-2J-AABO-01	TCGA	PAAD	Pancreas-Adenocarcinoma Ductal Type	PAAD	Used in CUPiD
TCGA-2J-AABP-01	TCGA	PAAD	Pancreas-Undifferentiated Carcinoma	NotUsed	Pancreatic Cancer Potential Misclassification
TCGA-2J-AABR-01	TCGA	PAAD	Pancreas-Adenocarcinoma Ductal Type	PAAD	Used in CUPiD
TCGA-2J-AABT-01	TCGA	PAAD	Pancreas-Adenocarcinoma Ductal Type	PAAD	Used in CUPiD
TCGA-2J-AABU-01	TCGA	PAAD	Pancreas-Adenocarcinoma Ductal Type	PAAD	Used in CUPiD
TCGA-2J-AABV-01	TCGA	PAAD	Pancreas-Adenocarcinoma Ductal Type	PAAD	Used in CUPiD
TCGA-2K-A9WE-01	TCGA	KIRP	Kidney Papillary Renal Cell Carcinoma	KIRP	Used in CUPiD
TCGA-2L-AAQA-01	TCGA	PAAD	Pancreas-Adenocarcinoma Ductal Type	PAAD	Used in CUPiD
TCGA-2L-AAQE-01	TCGA	PAAD	Pancreas-Adenocarcinoma Ductal Type	PAAD	Used in CUPiD
TCGA-2L-AAQI-01	TCGA	PAAD	Pancreas-Adenocarcinoma Ductal Type	PAAD	Used in CUPiD
TCGA-2L-AAQJ-01	TCGA	PAAD	Pancreas-Adenocarcinoma Ductal Type	PAAD	Used in CUPiD
TCGA-2L-AAQL-01	TCGA	PAAD	Pancreas-Adenocarcinoma Ductal Type	PAAD	Used in CUPiD
TCGA-2L-AAQM-01	TCGA	PAAD	Pancreas-Adenocarcinoma-Other Subtype	NotUsed	Pancreatic Cancer Potential Misclassification
TCGA-2V-A95S-01	TCGA	LIHC	Hepatocellular Carcinoma	LIHC	Used in CUPiD
TCGA-2W-A8YY-01	TCGA	CESC	Adenosquamous	NotUsed	Mixed Class
TCGA-2X-A9D5-01	TCGA	TGCT	Seminoma; NOS	TGCT	Used in CUPiD
TCGA-2X-A9D6-01	TCGA	TGCT	Seminoma; NOS	TGCT	Used in CUPiD
TCGA-2Y-A9GS-01	TCGA	LIHC	Hepatocellular Carcinoma	LIHC	Used in CUPiD
TCGA-2Y-A9GT-01	TCGA	LIHC	Hepatocellular Carcinoma	LIHC	Used in CUPiD
TCGA-2Y-A9GU-01	TCGA	LIHC	Hepatocellular Carcinoma	LIHC	Used in CUPiD
TCGA-2Y-A9GV-01	TCGA	LIHC	Hepatocellular Carcinoma	LIHC	Used in CUPiD
TCGA-2Y-A9GW-01	TCGA	LIHC	Hepatocellular Carcinoma	LIHC	Used in CUPiD
TCGA-2Y-A9GX-01	TCGA	LIHC	Hepatocellular Carcinoma	LIHC	Used in CUPiD
TCGA-2Y-A9GY-01	TCGA	LIHC	Hepatocellular Carcinoma	LIHC	Used in CUPiD
TCGA-2Y-A9GZ-01	TCGA	LIHC	Hepatocellular Carcinoma	LIHC	Used in CUPiD
TCGA-2Y-A9H0-01	TCGA	LIHC	Hepatocellular Carcinoma	LIHC	Used in CUPiD
TCGA-2Y-A9H1-01	TCGA	LIHC	Hepatocellular Carcinoma	LIHC	Used in CUPiD
TCGA-2Y-A9H2-01	TCGA	LIHC	Hepatocellular Carcinoma	LIHC	Used in CUPiD
TCGA-2Y-A9H3-01	TCGA	LIHC	Hepatocellular Carcinoma	LIHC	Used in CUPiD
TCGA-2Y-A9H4-01	TCGA	LIHC	Hepatocellular Carcinoma	LIHC	Used in CUPiD
TCGA-2Y-A9H5-01	TCGA	LIHC	Hepatocellular Carcinoma	LIHC	Used in CUPiD
TCGA-2Y-A9H6-01	TCGA	LIHC	Hepatocellular Carcinoma	LIHC	Used in CUPiD
TCGA-2Y-A9H7-01	TCGA	LIHC	Hepatocellular Carcinoma	LIHC	Used in CUPiD
TCGA-2Y-A9H8-01	TCGA	LIHC	Hepatocellular Carcinoma	LIHC	Used in CUPiD
TCGA-2Y-A9H9-01	TCGA	LIHC	Hepatocellular Carcinoma	LIHC	Used in CUPiD
TCGA-2Y-A9HA-01	TCGA	LIHC	Hepatocellular Carcinoma	LIHC	Used in CUPiD
TCGA-2Y-A9HB-01	TCGA	LIHC	Hepatocellular Carcinoma	LIHC	Used in CUPiD
TCGA-2Z-A9J1-01	TCGA	KIRP	Kidney Papillary Renal Cell Carcinoma	KIRP	Used in CUPiD
TCGA-2Z-A9J2-01	TCGA	KIRP	Kidney Papillary Renal Cell Carcinoma	KIRP	Used in CUPiD
TCGA-2Z-A9J3-01	TCGA	KIRP	Kidney Papillary Renal Cell Carcinoma	KIRP	Used in CUPiD
TCGA-2Z-A9J5-01	TCGA	KIRP	Kidney Papillary Renal Cell Carcinoma	KIRP	Used in CUPiD
TCGA-2Z-A9J6-01	TCGA	KIRP	Kidney Papillary Renal Cell Carcinoma	KIRP	Used in CUPiD
TCGA-2Z-A9J7-01	TCGA	KIRP	Kidney Papillary Renal Cell Carcinoma	KIRP	Used in CUPiD
TCGA-2Z-A9J8-01	TCGA	KIRP	Kidney Papillary Renal Cell Carcinoma	KIRP	Used in CUPiD
TCGA-2Z-A9J9-01	TCGA	KIRP	Kidney Papillary Renal Cell Carcinoma	KIRP	Used in CUPiD
TCGA-2Z-A9JD-01	TCGA	KIRP	Kidney Papillary Renal Cell Carcinoma	KIRP	Used in CUPiD
TCGA-2Z-A9JE-01	TCGA	KIRP	Kidney Papillary Renal Cell Carcinoma	KIRP	Used in CUPiD
TCGA-2Z-A9JG-01	TCGA	KIRP	Kidney Papillary Renal Cell Carcinoma	KIRP	Used in CUPiD
TCGA-2Z-A9JI-01	TCGA	KIRP	Kidney Papillary Renal Cell Carcinoma	KIRP	Used in CUPiD
TCGA-2Z-A9JJ-01	TCGA	KIRP	Kidney Papillary Renal Cell Carcinoma	KIRP	Used in CUPiD
TCGA-2Z-A9JK-01	TCGA	KIRP	Kidney Papillary Renal Cell Carcinoma	KIRP	Used in CUPiD
TCGA-2Z-A9JL-01	TCGA	KIRP	Kidney Papillary Renal Cell Carcinoma	KIRP	Used in CUPiD
TCGA-2Z-A9JM-01	TCGA	KIRP	Kidney Papillary Renal Cell Carcinoma	KIRP	Used in CUPiD
TCGA-2Z-A9JN-01	TCGA	KIRP	Kidney Papillary Renal Cell Carcinoma	KIRP	Used in CUPiD
TCGA-2Z-A9JO-01	TCGA	KIRP	Kidney Papillary Renal Cell Carcinoma	KIRP	Used in CUPiD
TCGA-2Z-A9JP-01	TCGA	KIRP	Kidney Papillary Renal Cell Carcinoma	KIRP	Used in CUPiD
TCGA-2Z-A9JQ-01	TCGA	KIRP	Kidney Papillary Renal Cell Carcinoma	KIRP	Used in CUPiD
TCGA-2Z-A9JR-01	TCGA	KIRP	Kidney Papillary Renal Cell Carcinoma	KIRP	Used in CUPiD
TCGA-2Z-A9JS-01	TCGA	KIRP	Kidney Papillary Renal Cell Carcinoma	KIRP	Used in CUPiD
TCGA-2Z-A9JT-01	TCGA	KIRP	Kidney Papillary Renal Cell Carcinoma	KIRP	Used in CUPiD
TCGA-32-1979-01	TCGA	GBM	Untreated primary (de novo) GBM	GBM	Used in CUPiD
TCGA-32-1980-01	TCGA	GBM	Untreated primary (de novo) GBM	GBM	Used in CUPiD
TCGA-32-5222-01	TCGA	GBM	Untreated primary (de novo) GBM	GBM	Used in CUPiD
TCGA-33-4566-01	TCGA	LUSC	Lung Squamous Cell Carcinoma	LUSC	Used in CUPiD
TCGA-33-4566-11	TCGA	LUSC	Lung Squamous Cell Carcinoma	Normal Tissue	Adjacent Normal
TCGA-33-4582-01	TCGA	LUSC	Lung Squamous Cell Carcinoma	LUSC	Used in CUPiD
TCGA-33-4582-11	TCGA	LUSC	Lung Squamous Cell Carcinoma	Normal Tissue	Adjacent Normal
TCGA-33-4583-01	TCGA	LUSC	Lung Squamous Cell Carcinoma	LUSC	Used in CUPiD
TCGA-33-4583-11	TCGA	LUSC	Lung Squamous Cell Carcinoma	Normal Tissue	Adjacent Normal
TCGA-33-4586-01	TCGA	LUSC	Lung Squamous Cell Carcinoma	LUSC	Used in CUPiD
TCGA-33-4586-11	TCGA	LUSC	Lung Squamous Cell Carcinoma	Normal Tissue	Adjacent Normal
TCGA-33-4587-01	TCGA	LUSC	Lung Squamous Cell Carcinoma	LUSC	Used in CUPiD
TCGA-33-4589-01	TCGA	LUSC	Lung Squamous Cell Carcinoma	LUSC	Used in CUPiD
TCGA-33-4589-11	TCGA	LUSC	Lung Squamous Cell Carcinoma	Normal Tissue	Adjacent Normal
TCGA-33-6738-01	TCGA	LUSC	Lung Squamous Cell Carcinoma	LUSC	Used in CUPiD
TCGA-33-A4WN-01	TCGA	LUSC	Lung Squamous Cell Carcinoma	LUSC	Used in CUPiD
TCGA-33-A5GW-01	TCGA	LUSC	Lung Squamous Cell Carcinoma	LUSC	Used in CUPiD
TCGA-33-AAS8-01	TCGA	LUSC	Lung Squamous Cell Carcinoma	LUSC	Used in CUPiD
TCGA-33-AASB-01	TCGA	LUSC	Lung Squamous Cell Carcinoma	LUSC	Used in CUPiD
TCGA-33-AASD-01	TCGA	LUSC	Lung Squamous Cell Carcinoma	LUSC	Used in CUPiD
TCGA-33-AASI-01	TCGA	LUSC	Lung Squamous Cell Carcinoma	LUSC	Used in CUPiD
TCGA-33-AASJ-01	TCGA	LUSC	Lung Squamous Cell Carcinoma	LUSC	Used in CUPiD
TCGA-33-AASL-01	TCGA	LUSC	Lung Squamous Cell Carcinoma	LUSC	Used in CUPiD
TCGA-34-5231-01	TCGA	LUSC	Lung Squamous Cell Carcinoma	LUSC	Used in CUPiD
TCGA-34-5232-01	TCGA	LUSC	Lung Squamous Cell Carcinoma	LUSC	Used in CUPiD
TCGA-34-5234-01	TCGA	LUSC	Lung Squamous Cell Carcinoma	LUSC	Used in CUPiD
TCGA-34-5236-01	TCGA	LUSC	Lung Squamous Cell Carcinoma	LUSC	Used in CUPiD
TCGA-34-5239-01	TCGA	LUSC	Lung Squamous Cell Carcinoma	LUSC	Used in CUPiD
TCGA-34-5240-01	TCGA	LUSC	Lung Squamous Cell Carcinoma	LUSC	Used in CUPiD
TCGA-34-5241-01	TCGA	LUSC	Lung Squamous Cell Carcinoma	LUSC	Used in CUPiD
TCGA-34-5927-01	TCGA	LUSC	Lung Squamous Cell Carcinoma	LUSC	Used in CUPiD
TCGA-34-5928-01	TCGA	LUSC	Lung Squamous Cell Carcinoma	LUSC	Used in CUPiD
TCGA-34-5929-01	TCGA	LUSC	Lung Squamous Cell Carcinoma	LUSC	Used in CUPiD
TCGA-34-5929-11	TCGA	LUSC	Lung Squamous Cell Carcinoma	Normal Tissue	Adjacent Normal
TCGA-34-7107-01	TCGA	LUSC	Lung Squamous Cell Carcinoma	LUSC	Used in CUPiD
TCGA-34-8454-01	TCGA	LUSC	Lung Squamous Cell Carcinoma	LUSC	Used in CUPiD
TCGA-34-8455-01	TCGA	LUSC	Lung Squamous Cell Carcinoma	LUSC	Used in CUPiD
TCGA-34-8456-01	TCGA	LUSC	Lung Squamous Cell Carcinoma	LUSC	Used in CUPiD
TCGA-34-A5IX-01	TCGA	LUSC	Lung Squamous Cell Carcinoma	LUSC	Used in CUPiD
TCGA-35-5375-01	TCGA	LUAD	Lung Adenocarcinoma	LUAD	Used in CUPiD
TCGA-37-5819-01	TCGA	LUSC	Lung Squamous Cell Carcinoma	LUSC	Used in CUPiD
TCGA-37-A5EL-01	TCGA	LUSC	Lung Squamous Cell Carcinoma	LUSC	Used in CUPiD
TCGA-37-A5EM-01	TCGA	LUSC	Lung Squamous Cell Carcinoma	LUSC	Used in CUPiD
TCGA-37-A5EN-01	TCGA	LUSC	Lung Squamous Cell Carcinoma	LUSC	Used in CUPiD
TCGA-38-4631-01	TCGA	LUAD	Lung Adenocarcinoma	LUAD	Used in CUPiD
TCGA-38-4631-11	TCGA	LUAD	Lung Adenocarcinoma	Normal Tissue	Adjacent Normal
TCGA-38-4632-01	TCGA	LUAD	Lung Adenocarcinoma	LUAD	Used in CUPiD
TCGA-38-4632-11	TCGA	LUAD	Lung Adenocarcinoma	Normal Tissue	Adjacent Normal
TCGA-38-6178-01	TCGA	LUAD	Lung Adenocarcinoma	LUAD	Used in CUPiD
TCGA-38-7271-01	TCGA	LUAD	Lung Adenocarcinoma	LUAD	Used in CUPiD
TCGA-38-A44F-01	TCGA	LUAD	Lung Adenocarcinoma	LUAD	Used in CUPiD
TCGA-39-5011-01	TCGA	LUSC	Lung Squamous Cell Carcinoma	LUSC	Used in CUPiD
TCGA-39-5011-11	TCGA	LUSC	Lung Squamous Cell Carcinoma	Normal Tissue	Adjacent Normal
TCGA-39-5016-01	TCGA	LUSC	Lung Squamous Cell Carcinoma	LUSC	Used in CUPiD
TCGA-39-5016-11	TCGA	LUSC	Lung Squamous Cell Carcinoma	Normal Tissue	Adjacent Normal
TCGA-39-5019-01	TCGA	LUSC	Lung Squamous Cell Carcinoma	LUSC	Used in CUPiD
TCGA-39-5019-11	TCGA	LUSC	Lung Squamous Cell Carcinoma	Normal Tissue	Adjacent Normal
TCGA-39-5021-01	TCGA	LUSC	Lung Squamous Cell Carcinoma	LUSC	Used in CUPiD
TCGA-39-5021-11	TCGA	LUSC	Lung Squamous Cell Carcinoma	Normal Tissue	Adjacent Normal
TCGA-39-5022-01	TCGA	LUSC	Lung Squamous Cell Carcinoma	LUSC	Used in CUPiD
TCGA-39-5024-01	TCGA	LUSC	Lung Squamous Cell Carcinoma	LUSC	Used in CUPiD
TCGA-39-5027-01	TCGA	LUSC	Lung Squamous Cell Carcinoma	LUSC	Used in CUPiD
TCGA-39-5028-01	TCGA	LUSC	Lung Squamous Cell Carcinoma	LUSC	Used in CUPiD
TCGA-39-5028-11	TCGA	LUSC	Lung Squamous Cell Carcinoma	Normal Tissue	Adjacent Normal
TCGA-39-5029-01	TCGA	LUSC	Lung Squamous Cell Carcinoma	LUSC	Used in CUPiD
TCGA-39-5029-11	TCGA	LUSC	Lung Squamous Cell Carcinoma	Normal Tissue	Adjacent Normal
TCGA-39-5030-01	TCGA	LUSC	Lung Squamous Cell Carcinoma	LUSC	Used in CUPiD
TCGA-39-5030-11	TCGA	LUSC	Lung Squamous Cell Carcinoma	Normal Tissue	Adjacent Normal
TCGA-39-5031-01	TCGA	LUSC	Lung Squamous Cell Carcinoma	LUSC	Used in CUPiD
TCGA-39-5031-11	TCGA	LUSC	Lung Squamous Cell Carcinoma	Normal Tissue	Adjacent Normal
TCGA-39-5034-01	TCGA	LUSC	Lung Squamous Cell Carcinoma	LUSC	Used in CUPiD
TCGA-39-5034-11	TCGA	LUSC	Lung Squamous Cell Carcinoma	Normal Tissue	Adjacent Normal
TCGA-39-5035-01	TCGA	LUSC	Lung Squamous Cell Carcinoma	LUSC	Used in CUPiD
TCGA-39-5035-11	TCGA	LUSC	Lung Squamous Cell Carcinoma	Normal Tissue	Adjacent Normal
TCGA-39-5036-01	TCGA	LUSC	Lung Squamous Cell Carcinoma	LUSC	Used in CUPiD
TCGA-39-5036-11	TCGA	LUSC	Lung Squamous Cell Carcinoma	Normal Tissue	Adjacent Normal
TCGA-39-5037-01	TCGA	LUSC	Lung Squamous Cell Carcinoma	LUSC	Used in CUPiD
TCGA-39-5037-11	TCGA	LUSC	Lung Squamous Cell Carcinoma	Normal Tissue	Adjacent Normal
TCGA-39-5039-01	TCGA	LUSC	Lung Squamous Cell Carcinoma	LUSC	Used in CUPiD
TCGA-39-5039-11	TCGA	LUSC	Lung Squamous Cell Carcinoma	Normal Tissue	Adjacent Normal
TCGA-39-5040-01	TCGA	LUSC	Lung Squamous Cell Carcinoma	LUSC	Used in CUPiD
TCGA-3A-A9I5-01	TCGA	PAAD	Pancreas-Adenocarcinoma Ductal Type	PAAD	Used in CUPiD
TCGA-3A-A9I7-01	TCGA	PAAD	Pancreas-Adenocarcinoma Ductal Type	PAAD	Used in CUPiD
TCGA-3A-A9I9-01	TCGA	PAAD	Pancreas-Adenocarcinoma Ductal Type	PAAD	Used in CUPiD
TCGA-3A-A9IB-01	TCGA	PAAD	Pancreas-Adenocarcinoma Ductal Type	PAAD	Used in CUPiD
TCGA-3A-A9IC-01	TCGA	PAAD	Pancreas-Adenocarcinoma Ductal Type	PAAD	Used in CUPiD
TCGA-3A-A9IH-01	TCGA	PAAD	Pancreas-Adenocarcinoma Ductal Type	PAAD	Used in CUPiD
TCGA-3A-A9IJ-01	TCGA	PAAD	Pancreas-Adenocarcinoma-Other Subtype	NotUsed	Pancreatic Cancer Potential Misclassification
TCGA-3A-A9IL-01	TCGA	PAAD	Pancreas-Adenocarcinoma-Other Subtype	NotUsed	Pancreatic Cancer Potential Misclassification
TCGA-3A-A9IN-01	TCGA	PAAD	Pancreas-Adenocarcinoma-Other Subtype	NotUsed	Pancreatic Cancer Potential Misclassification
TCGA-3A-A9IO-01	TCGA	PAAD	Pancreas-Adenocarcinoma-Other Subtype	NotUsed	Pancreatic Cancer Potential Misclassification
TCGA-3A-A9IR-01	TCGA	PAAD	Pancreas-Adenocarcinoma-Other Subtype	NotUsed	Pancreatic Cancer Potential Misclassification
TCGA-3A-A9IS-01	TCGA	PAAD	Pancreas-Adenocarcinoma-Other Subtype	NotUsed	Pancreatic Cancer Potential Misclassification
TCGA-3A-A9IU-01	TCGA	PAAD	Pancreas-Adenocarcinoma Ductal Type	PAAD	Used in CUPiD
TCGA-3A-A9IV-01	TCGA	PAAD	Pancreas-Adenocarcinoma-Other Subtype	NotUsed	Pancreatic Cancer Potential Misclassification
TCGA-3A-A9IX-01	TCGA	PAAD	Pancreas-Adenocarcinoma Ductal Type	PAAD	Used in CUPiD
TCGA-3A-A9IZ-01	TCGA	PAAD	Pancreas-Adenocarcinoma Ductal Type	PAAD	Used in CUPiD
TCGA-3A-A9J0-01	TCGA	PAAD	Pancreas-Adenocarcinoma Ductal Type	PAAD	Used in CUPiD
TCGA-3B-A9HI-01	TCGA	SARC	Dedifferentiated liposarcoma	SARC	Used in CUPiD
TCGA-3B-A9HJ-01	TCGA	SARC	Dedifferentiated liposarcoma	SARC	Used in CUPiD
TCGA-3B-A9HL-01	TCGA	SARC	Dedifferentiated liposarcoma	SARC	Used in CUPiD
TCGA-3B-A9HO-01	TCGA	SARC	Dedifferentiated liposarcoma	SARC	Used in CUPiD
TCGA-3B-A9HP-01	TCGA	SARC	Leiomyosarcoma (LMS)	SARC	Used in CUPiD
TCGA-3B-A9HQ-01	TCGA	SARC	Leiomyosarcoma (LMS)	SARC	Used in CUPiD
TCGA-3B-A9HR-01	TCGA	SARC	Leiomyosarcoma (LMS)	SARC	Used in CUPiD
TCGA-3B-A9HS-01	TCGA	SARC	Leiomyosarcoma (LMS)	SARC	Used in CUPiD
TCGA-3B-A9HT-01	TCGA	SARC	Leiomyosarcoma (LMS)	SARC	Used in CUPiD
TCGA-3B-A9HU-01	TCGA	SARC	Leiomyosarcoma (LMS)	SARC	Used in CUPiD
TCGA-3B-A9HV-01	TCGA	SARC	Leiomyosarcoma (LMS)	SARC	Used in CUPiD
TCGA-3B-A9HX-01	TCGA	SARC	Leiomyosarcoma (LMS)	SARC	Used in CUPiD
TCGA-3B-A9HY-01	TCGA	SARC	Leiomyosarcoma (LMS)	SARC	Used in CUPiD
TCGA-3B-A9HZ-01	TCGA	SARC	Leiomyosarcoma (LMS)	SARC	Used in CUPiD
TCGA-3B-A9I0-01	TCGA	SARC	Leiomyosarcoma (LMS)	SARC	Used in CUPiD
TCGA-3B-A9I1-01	TCGA	SARC	Leiomyosarcoma (LMS)	SARC	Used in CUPiD
TCGA-3B-A9I3-01	TCGA	SARC	Leiomyosarcoma (LMS)	SARC	Used in CUPiD
TCGA-3C-AAAU-01	TCGA	BRCA	Infiltrating Lobular Carcinoma	BRCA	Used in CUPiD
TCGA-3C-AALI-01	TCGA	BRCA	Infiltrating Ductal Carcinoma	BRCA	Used in CUPiD
TCGA-3C-AALJ-01	TCGA	BRCA	Infiltrating Ductal Carcinoma	BRCA	Used in CUPiD
TCGA-3C-AALK-01	TCGA	BRCA	Infiltrating Ductal Carcinoma	BRCA	Used in CUPiD
TCGA-3E-AAAY-01	TCGA	PAAD	Pancreas-Adenocarcinoma Ductal Type	PAAD	Used in CUPiD
TCGA-3E-AAAZ-01	TCGA	PAAD	Pancreas-Adenocarcinoma Ductal Type	PAAD	Used in CUPiD
TCGA-3G-AB0O-01	TCGA	THYM	Thymoma; Type B1	THYM	Used in CUPiD
TCGA-3G-AB0Q-01	TCGA	THYM	Thymoma; Type A	THYM	Used in CUPiD
TCGA-3G-AB0T-01	TCGA	THYM	Thymoma; Type B1	THYM	Used in CUPiD
TCGA-3G-AB14-01	TCGA	THYM	Thymoma; Type B2	THYM	Used in CUPiD
TCGA-3G-AB19-01	TCGA	THYM	Thymoma; Type A	THYM	Used in CUPiD
TCGA-3H-AB3K-01	TCGA	MESO	Diffuse malignant mesothelioma - NOS	MESO	Used in CUPiD
TCGA-3H-AB3L-01	TCGA	MESO	Epithelioid mesothelioma	MESO	Used in CUPiD
TCGA-3H-AB3M-01	TCGA	MESO	Epithelioid mesothelioma	MESO	Used in CUPiD
TCGA-3H-AB3O-01	TCGA	MESO	Epithelioid mesothelioma	MESO	Used in CUPiD
TCGA-3H-AB3S-01	TCGA	MESO	Epithelioid mesothelioma	MESO	Used in CUPiD
TCGA-3H-AB3T-01	TCGA	MESO	Biphasic mesothelioma	MESO	Used in CUPiD
TCGA-3H-AB3U-01	TCGA	MESO	Epithelioid mesothelioma	MESO	Used in CUPiD
TCGA-3H-AB3X-01	TCGA	MESO	Epithelioid mesothelioma	MESO	Used in CUPiD
TCGA-3K-AAZ8-01	TCGA	LIHC	Hepatocellular Carcinoma	LIHC	Used in CUPiD
TCGA-3L-AA1B-01	TCGA	COAD	Colon Adenocarcinoma	LowerGI	Used in CUPiD
TCGA-3M-AB46-01	TCGA	STAD	Stomach, Adenocarcinoma, Not Otherwise Specified (NOS)	UpperGI	Used in CUPiD
TCGA-3M-AB47-01	TCGA	STAD	Stomach, Adenocarcinoma, Not Otherwise Specified (NOS)	UpperGI	Used in CUPiD
TCGA-3N-A9WB-06	TCGA	SKCM	NA	SKCM	Used in CUPiD
TCGA-3N-A9WC-06	TCGA	SKCM	NA	SKCM	Used in CUPiD
TCGA-3N-A9WD-06	TCGA	SKCM	NA	SKCM	Used in CUPiD
TCGA-3P-A9WA-01	TCGA	OV	Serous Cystadenocarcinoma	Gynae	Used in CUPiD
TCGA-3Q-A9WF-01	TCGA	THYM	Thymoma; Type B2	THYM	Used in CUPiD
TCGA-3R-A8YX-01	TCGA	SARC	Dedifferentiated liposarcoma	SARC	Used in CUPiD
TCGA-3S-A8YW-01	TCGA	THYM	Thymoma; Type C	THYM	Used in CUPiD
TCGA-3S-AAYX-01	TCGA	THYM	Thymoma; Type B1	THYM	Used in CUPiD
TCGA-3T-AA9L-01	TCGA	THYM	Thymoma; Type B1	THYM	Used in CUPiD
TCGA-3U-A98D-01	TCGA	MESO	Biphasic mesothelioma	MESO	Used in CUPiD
TCGA-3U-A98E-01	TCGA	MESO	Epithelioid mesothelioma	MESO	Used in CUPiD
TCGA-3U-A98F-01	TCGA	MESO	Biphasic mesothelioma	MESO	Used in CUPiD
TCGA-3U-A98G-01	TCGA	MESO	Biphasic mesothelioma	MESO	Used in CUPiD
TCGA-3U-A98H-01	TCGA	MESO	Biphasic mesothelioma	MESO	Used in CUPiD
TCGA-3U-A98I-01	TCGA	MESO	Biphasic mesothelioma	MESO	Used in CUPiD
TCGA-3U-A98J-01	TCGA	MESO	Epithelioid mesothelioma	MESO	Used in CUPiD
TCGA-3X-AAV9-01	TCGA	CHOL	Cholangiocarcinoma; intrahepatic	CHOL	Used in CUPiD
TCGA-3X-AAVA-01	TCGA	CHOL	Cholangiocarcinoma; intrahepatic	CHOL	Used in CUPiD
TCGA-3X-AAVB-01	TCGA	CHOL	Cholangiocarcinoma; distal	CHOL	Used in CUPiD
TCGA-3X-AAVC-01	TCGA	CHOL	Cholangiocarcinoma; hilar/perihilar	CHOL	Used in CUPiD
TCGA-3X-AAVE-01	TCGA	CHOL	Cholangiocarcinoma; intrahepatic	CHOL	Used in CUPiD
TCGA-3Z-A93Z-01	TCGA	KIRC	Kidney Clear Cell Renal Carcinoma	KIRC	Used in CUPiD
TCGA-41-5651-01	TCGA	GBM	Untreated primary (de novo) GBM	GBM	Used in CUPiD
TCGA-41-6646-01	TCGA	GBM	Untreated primary (de novo) GBM	GBM	Used in CUPiD
TCGA-43-3394-11	TCGA	LUSC	Lung Squamous Cell Carcinoma	Normal Tissue	Adjacent Normal
TCGA-43-3920-11	TCGA	LUSC	Lung Squamous Cell Carcinoma	Normal Tissue	Adjacent Normal
TCGA-43-5668-01	TCGA	LUSC	Lung Squamous Cell Carcinoma	LUSC	Used in CUPiD
TCGA-43-5668-11	TCGA	LUSC	Lung Squamous Cell Carcinoma	Normal Tissue	Adjacent Normal
TCGA-43-5670-01	TCGA	LUSC	Lung Squamous Cell Carcinoma	LUSC	Used in CUPiD
TCGA-43-6143-01	TCGA	LUSC	Lung Squamous Cell Carcinoma	LUSC	Used in CUPiD
TCGA-43-6647-01	TCGA	LUSC	Lung Squamous Cell Carcinoma	LUSC	Used in CUPiD
TCGA-43-6770-01	TCGA	LUSC	Lung Squamous Cell Carcinoma	LUSC	Used in CUPiD
TCGA-43-6771-01	TCGA	LUSC	Lung Squamous Cell Carcinoma	LUSC	Used in CUPiD
TCGA-43-6771-11	TCGA	LUSC	Lung Squamous Cell Carcinoma	Normal Tissue	Adjacent Normal
TCGA-43-6773-01	TCGA	LUSC	Lung Squamous Cell Carcinoma	LUSC	Used in CUPiD
TCGA-43-7656-01	TCGA	LUSC	Lung Squamous Cell Carcinoma	LUSC	Used in CUPiD
TCGA-43-7657-01	TCGA	LUSC	Lung Squamous Cell Carcinoma	LUSC	Used in CUPiD
TCGA-43-7658-01	TCGA	LUSC	Lung Squamous Cell Carcinoma	LUSC	Used in CUPiD
TCGA-43-8115-01	TCGA	LUSC	Lung Squamous Cell Carcinoma	LUSC	Used in CUPiD
TCGA-43-8116-01	TCGA	LUSC	Lung Squamous Cell Carcinoma	LUSC	Used in CUPiD
TCGA-43-8118-01	TCGA	LUSC	Lung Squamous Cell Carcinoma	LUSC	Used in CUPiD
TCGA-43-A474-01	TCGA	LUSC	Lung Squamous Cell Carcinoma	LUSC	Used in CUPiD
TCGA-43-A475-01	TCGA	LUSC	Lung Squamous Cell Carcinoma	LUSC	Used in CUPiD
TCGA-43-A56U-01	TCGA	LUSC	Lung Squamous Cell Carcinoma	LUSC	Used in CUPiD
TCGA-43-A56V-01	TCGA	LUSC	Lung Squamous Cell Carcinoma	LUSC	Used in CUPiD
TCGA-44-2655-11	TCGA	LUAD	Lung Adenocarcinoma	Normal Tissue	Adjacent Normal
TCGA-44-2656-01	TCGA	LUAD	Lung Adenocarcinoma	LUAD	Used in CUPiD
TCGA-44-2656-11	TCGA	LUAD	Lung Adenocarcinoma	Normal Tissue	Adjacent Normal
TCGA-44-2659-11	TCGA	LUAD	Lung Adenocarcinoma	Normal Tissue	Adjacent Normal
TCGA-44-2662-11	TCGA	LUAD	Lung Adenocarcinoma	Normal Tissue	Adjacent Normal
TCGA-44-2665-01	TCGA	LUAD	Lung Adenocarcinoma	LUAD	Used in CUPiD
TCGA-44-2665-11	TCGA	LUAD	Lung Adenocarcinoma	Normal Tissue	Adjacent Normal
TCGA-44-2666-01	TCGA	LUAD	Lung Adenocarcinoma	LUAD	Used in CUPiD
TCGA-44-2668-01	TCGA	LUAD	Lung Adenocarcinoma	LUAD	Used in CUPiD
TCGA-44-2668-11	TCGA	LUAD	Lung Adenocarcinoma	Normal Tissue	Adjacent Normal
TCGA-44-3917-01	TCGA	LUAD	Lung Adenocarcinoma	LUAD	Used in CUPiD
TCGA-44-3918-01	TCGA	LUAD	Lung Adenocarcinoma	LUAD	Used in CUPiD
TCGA-44-4112-01	TCGA	LUAD	Lung Adenocarcinoma	LUAD	Used in CUPiD
TCGA-44-5643-01	TCGA	LUAD	Lung Adenocarcinoma	LUAD	Used in CUPiD
TCGA-44-5643-11	TCGA	LUAD	Lung Adenocarcinoma	Normal Tissue	Adjacent Normal
TCGA-44-5644-01	TCGA	LUAD	Lung Adenocarcinoma	LUAD	Used in CUPiD
TCGA-44-5645-01	TCGA	LUAD	Lung Adenocarcinoma	LUAD	Used in CUPiD
TCGA-44-5645-11	TCGA	LUAD	Lung Adenocarcinoma	Normal Tissue	Adjacent Normal
TCGA-44-6144-01	TCGA	LUAD	Lung Adenocarcinoma	LUAD	Used in CUPiD
TCGA-44-6144-11	TCGA	LUAD	Lung Adenocarcinoma	Normal Tissue	Adjacent Normal
TCGA-44-6145-01	TCGA	LUAD	Lung Adenocarcinoma	LUAD	Used in CUPiD
TCGA-44-6145-11	TCGA	LUAD	Lung Adenocarcinoma	Normal Tissue	Adjacent Normal
TCGA-44-6146-01	TCGA	LUAD	Lung Adenocarcinoma	LUAD	Used in CUPiD
TCGA-44-6146-11	TCGA	LUAD	Lung Adenocarcinoma	Normal Tissue	Adjacent Normal
TCGA-44-6148-01	TCGA	LUAD	Lung Adenocarcinoma	LUAD	Used in CUPiD
TCGA-44-6148-11	TCGA	LUAD	Lung Adenocarcinoma	Normal Tissue	Adjacent Normal
TCGA-44-6774-01	TCGA	LUAD	Lung Adenocarcinoma	LUAD	Used in CUPiD
TCGA-44-6775-01	TCGA	LUAD	Lung Adenocarcinoma	LUAD	Used in CUPiD
TCGA-44-6776-01	TCGA	LUAD	Lung Adenocarcinoma	LUAD	Used in CUPiD
TCGA-44-6777-01	TCGA	LUAD	Lung Adenocarcinoma	LUAD	Used in CUPiD
TCGA-44-6778-01	TCGA	LUAD	Lung Adenocarcinoma	LUAD	Used in CUPiD
TCGA-44-6778-11	TCGA	LUAD	Lung Adenocarcinoma	Normal Tissue	Adjacent Normal
TCGA-44-6779-01	TCGA	LUAD	Lung Adenocarcinoma	LUAD	Used in CUPiD
TCGA-44-7659-01	TCGA	LUAD	Lung Adenocarcinoma	LUAD	Used in CUPiD
TCGA-44-7660-01	TCGA	LUAD	Lung Adenocarcinoma	LUAD	Used in CUPiD
TCGA-44-7661-01	TCGA	LUAD	Lung Adenocarcinoma	LUAD	Used in CUPiD
TCGA-44-7662-01	TCGA	LUAD	Lung Adenocarcinoma	LUAD	Used in CUPiD
TCGA-44-7667-01	TCGA	LUAD	Lung Adenocarcinoma	LUAD	Used in CUPiD
TCGA-44-7669-01	TCGA	LUAD	Lung Adenocarcinoma	LUAD	Used in CUPiD
TCGA-44-7670-01	TCGA	LUAD	Lung Adenocarcinoma	LUAD	Used in CUPiD
TCGA-44-7671-01	TCGA	LUAD	Lung Adenocarcinoma	LUAD	Used in CUPiD
TCGA-44-7672-01	TCGA	LUAD	Lung Adenocarcinoma	LUAD	Used in CUPiD
TCGA-44-8117-01	TCGA	LUAD	Lung Adenocarcinoma	LUAD	Used in CUPiD
TCGA-44-8119-01	TCGA	LUAD	Lung Adenocarcinoma	LUAD	Used in CUPiD
TCGA-44-8120-01	TCGA	LUAD	Lung Adenocarcinoma	LUAD	Used in CUPiD
TCGA-44-A479-01	TCGA	LUAD	Lung Adenocarcinoma	LUAD	Used in CUPiD
TCGA-44-A47A-01	TCGA	LUAD	Lung Adenocarcinoma	LUAD	Used in CUPiD
TCGA-44-A47B-01	TCGA	LUAD	Lung Adenocarcinoma	LUAD	Used in CUPiD
TCGA-44-A47F-01	TCGA	LUAD	Lung Adenocarcinoma	LUAD	Used in CUPiD
TCGA-44-A47G-01	TCGA	LUAD	Lung Adenocarcinoma	LUAD	Used in CUPiD
TCGA-44-A4SS-01	TCGA	LUAD	Lung Adenocarcinoma	LUAD	Used in CUPiD
TCGA-44-A4SU-01	TCGA	LUAD	Lung Adenocarcinoma	LUAD	Used in CUPiD
TCGA-46-6025-01	TCGA	LUSC	Lung Squamous Cell Carcinoma	LUSC	Used in CUPiD
TCGA-46-6026-01	TCGA	LUSC	Lung Squamous Cell Carcinoma	LUSC	Used in CUPiD
TCGA-49-4487-01	TCGA	LUAD	Lung Adenocarcinoma	LUAD	Used in CUPiD
TCGA-49-4488-01	TCGA	LUAD	Lung Adenocarcinoma	LUAD	Used in CUPiD
TCGA-49-4488-11	TCGA	LUAD	Lung Adenocarcinoma	Normal Tissue	Adjacent Normal
TCGA-49-4490-01	TCGA	LUAD	Lung Adenocarcinoma	LUAD	Used in CUPiD
TCGA-49-4512-01	TCGA	LUAD	Lung Adenocarcinoma	LUAD	Used in CUPiD
TCGA-49-4514-01	TCGA	LUAD	Lung Adenocarcinoma	LUAD	Used in CUPiD
TCGA-49-6742-01	TCGA	LUAD	Lung Adenocarcinoma	LUAD	Used in CUPiD
TCGA-49-6743-01	TCGA	LUAD	Lung Adenocarcinoma	LUAD	Used in CUPiD
TCGA-49-6744-01	TCGA	LUAD	Lung Adenocarcinoma	LUAD	Used in CUPiD
TCGA-49-6745-01	TCGA	LUAD	Lung Adenocarcinoma	LUAD	Used in CUPiD
TCGA-49-6745-11	TCGA	LUAD	Lung Adenocarcinoma	Normal Tissue	Adjacent Normal
TCGA-49-6761-01	TCGA	LUAD	Lung Adenocarcinoma	LUAD	Used in CUPiD
TCGA-49-6767-01	TCGA	LUAD	Lung Adenocarcinoma	LUAD	Used in CUPiD
TCGA-49-AAQV-01	TCGA	LUAD	Lung Adenocarcinoma	LUAD	Used in CUPiD
TCGA-49-AAR0-01	TCGA	LUAD	Lung Adenocarcinoma	LUAD	Used in CUPiD
TCGA-49-AAR2-01	TCGA	LUAD	Lung Adenocarcinoma	LUAD	Used in CUPiD
TCGA-49-AAR3-01	TCGA	LUAD	Lung Adenocarcinoma	LUAD	Used in CUPiD
TCGA-49-AAR4-01	TCGA	LUAD	Lung Adenocarcinoma	LUAD	Used in CUPiD
TCGA-49-AAR9-01	TCGA	LUAD	Lung Adenocarcinoma	LUAD	Used in CUPiD
TCGA-49-AARE-01	TCGA	LUAD	Lung Adenocarcinoma	LUAD	Used in CUPiD
TCGA-49-AARN-01	TCGA	LUAD	Lung Adenocarcinoma	LUAD	Used in CUPiD
TCGA-49-AARO-01	TCGA	LUAD	Lung Adenocarcinoma	LUAD	Used in CUPiD
TCGA-49-AARQ-01	TCGA	LUAD	Lung Adenocarcinoma	LUAD	Used in CUPiD
TCGA-49-AARR-01	TCGA	LUAD	Lung Adenocarcinoma	LUAD	Used in CUPiD
TCGA-4A-A93W-01	TCGA	KIRP	Kidney Papillary Renal Cell Carcinoma	KIRP	Used in CUPiD
TCGA-4A-A93X-01	TCGA	KIRP	Kidney Papillary Renal Cell Carcinoma	KIRP	Used in CUPiD
TCGA-4A-A93Y-01	TCGA	KIRP	Kidney Papillary Renal Cell Carcinoma	KIRP	Used in CUPiD
TCGA-4B-A93V-01	TCGA	LUAD	Lung Adenocarcinoma	LUAD	Used in CUPiD
TCGA-4C-A93U-01	TCGA	THCA	Thyroid Papillary Carcinoma - Classical/usual	THCA	Used in CUPiD
TCGA-4E-A92E-01	TCGA	UCEC	Endometrioid endometrial adenocarcinoma	Gynae	Used in CUPiD
TCGA-4G-AAZO-01	TCGA	CHOL	Cholangiocarcinoma; intrahepatic	CHOL	Used in CUPiD
TCGA-4G-AAZT-01	TCGA	CHOL	Cholangiocarcinoma; intrahepatic	CHOL	Used in CUPiD
TCGA-4H-AAAK-01	TCGA	BRCA	Infiltrating Lobular Carcinoma	BRCA	Used in CUPiD
TCGA-4J-AA1J-01	TCGA	CESC	Cervical Squamous Cell Carcinoma	CervSq	Used in CUPiD
TCGA-4K-AA1G-01	TCGA	TGCT	Seminoma; NOS	TGCT	Used in CUPiD
TCGA-4K-AA1H-01	TCGA	TGCT	Seminoma; NOS	TGCT	Used in CUPiD
TCGA-4K-AA1I-01	TCGA	TGCT	Seminoma; NOS	TGCT	Used in CUPiD
TCGA-4K-AAAL-01	TCGA	TGCT	Seminoma; NOS	TGCT	Used in CUPiD
TCGA-4L-AA1F-01	TCGA	PRAD	Prostate Adenocarcinoma Acinar Type	PRAD	Used in CUPiD
TCGA-4N-A93T-01	TCGA	COAD	Colon Adenocarcinoma	LowerGI	Used in CUPiD
TCGA-4P-AA8J-01	TCGA	HNSC	Head & Neck Squamous Cell Carcinoma	UpperSq	Used in CUPiD
TCGA-4R-AA8I-01	TCGA	LIHC	Hepatocellular Carcinoma	LIHC	Used in CUPiD
TCGA-4T-AA8H-01	TCGA	COAD	Colon Mucinous Adenocarcinoma	LowerGI	Used in CUPiD
TCGA-4V-A9QI-01	TCGA	THYM	Thymoma; Type B2	THYM	Used in CUPiD
TCGA-4V-A9QJ-01	TCGA	THYM	Thymoma; Type B3	THYM	Used in CUPiD
TCGA-4V-A9QL-01	TCGA	THYM	Thymoma; Type AB	THYM	Used in CUPiD
TCGA-4V-A9QM-01	TCGA	THYM	Thymoma; Type AB	THYM	Used in CUPiD
TCGA-4V-A9QN-01	TCGA	THYM	Thymoma; Type B3	THYM	Used in CUPiD
TCGA-4V-A9QQ-01	TCGA	THYM	Thymoma; Type B3	THYM	Used in CUPiD
TCGA-4V-A9QR-01	TCGA	THYM	Thymoma; Type B3	THYM	Used in CUPiD
TCGA-4V-A9QS-01	TCGA	THYM	Thymoma; Type B2	THYM	Used in CUPiD
TCGA-4V-A9QT-01	TCGA	THYM	Thymoma; Type B1	THYM	Used in CUPiD
TCGA-4V-A9QU-01	TCGA	THYM	Thymoma; Type AB	THYM	Used in CUPiD
TCGA-4V-A9QW-01	TCGA	THYM	Thymoma; Type AB	THYM	Used in CUPiD
TCGA-4V-A9QX-01	TCGA	THYM	Thymoma; Type AB	THYM	Used in CUPiD
TCGA-4W-AA9R-01	TCGA	GBM	Glioblastoma Multiforme (GBM)	GBM	Used in CUPiD
TCGA-4W-AA9S-01	TCGA	GBM	Glioblastoma Multiforme (GBM)	GBM	Used in CUPiD
TCGA-4W-AA9T-01	TCGA	GBM	Glioblastoma Multiforme (GBM)	GBM	Used in CUPiD
TCGA-4X-A9F9-01	TCGA	THYM	Thymoma; Type B1	THYM	Used in CUPiD
TCGA-4X-A9FA-01	TCGA	THYM	Thymoma; Type A	THYM	Used in CUPiD
TCGA-4X-A9FB-01	TCGA	THYM	Thymoma; Type B2	THYM	Used in CUPiD
TCGA-4X-A9FC-01	TCGA	THYM	Thymoma; Type AB	THYM	Used in CUPiD
TCGA-4X-A9FD-01	TCGA	THYM	Thymoma; Type B2	THYM	Used in CUPiD
TCGA-4Z-AA7M-01	TCGA	BLCA	Muscle invasive urothelial carcinoma (pT2 or above)	BLCA	Used in CUPiD
TCGA-4Z-AA7N-01	TCGA	BLCA	Muscle invasive urothelial carcinoma (pT2 or above)	BLCA	Used in CUPiD
TCGA-4Z-AA7O-01	TCGA	BLCA	Muscle invasive urothelial carcinoma (pT2 or above)	BLCA	Used in CUPiD
TCGA-4Z-AA7Q-01	TCGA	BLCA	Muscle invasive urothelial carcinoma (pT2 or above)	BLCA	Used in CUPiD
TCGA-4Z-AA7R-01	TCGA	BLCA	Muscle invasive urothelial carcinoma (pT2 or above)	BLCA	Used in CUPiD
TCGA-4Z-AA7S-01	TCGA	BLCA	Muscle invasive urothelial carcinoma (pT2 or above)	BLCA	Used in CUPiD
TCGA-4Z-AA7W-01	TCGA	BLCA	Muscle invasive urothelial carcinoma (pT2 or above)	BLCA	Used in CUPiD
TCGA-4Z-AA7Y-01	TCGA	BLCA	Muscle invasive urothelial carcinoma (pT2 or above)	BLCA	Used in CUPiD
TCGA-4Z-AA80-01	TCGA	BLCA	Muscle invasive urothelial carcinoma (pT2 or above)	BLCA	Used in CUPiD
TCGA-4Z-AA81-01	TCGA	BLCA	Muscle invasive urothelial carcinoma (pT2 or above)	BLCA	Used in CUPiD
TCGA-4Z-AA82-01	TCGA	BLCA	Muscle invasive urothelial carcinoma (pT2 or above)	BLCA	Used in CUPiD
TCGA-4Z-AA83-01	TCGA	BLCA	Muscle invasive urothelial carcinoma (pT2 or above)	BLCA	Used in CUPiD
TCGA-4Z-AA84-01	TCGA	BLCA	Muscle invasive urothelial carcinoma (pT2 or above)	BLCA	Used in CUPiD
TCGA-4Z-AA86-01	TCGA	BLCA	Muscle invasive urothelial carcinoma (pT2 or above)	BLCA	Used in CUPiD
TCGA-4Z-AA87-01	TCGA	BLCA	Muscle invasive urothelial carcinoma (pT2 or above)	BLCA	Used in CUPiD
TCGA-4Z-AA89-01	TCGA	BLCA	Muscle invasive urothelial carcinoma (pT2 or above)	BLCA	Used in CUPiD
TCGA-50-5044-01	TCGA	LUAD	Lung Adenocarcinoma	LUAD	Used in CUPiD
TCGA-50-5045-01	TCGA	LUAD	Lung Adenocarcinoma	LUAD	Used in CUPiD
TCGA-50-5049-01	TCGA	LUAD	Lung Adenocarcinoma	LUAD	Used in CUPiD
TCGA-50-5051-01	TCGA	LUAD	Lung Adenocarcinoma	LUAD	Used in CUPiD
TCGA-50-5055-01	TCGA	LUAD	Lung Adenocarcinoma	LUAD	Used in CUPiD
TCGA-50-5066-01	TCGA	LUAD	Lung Adenocarcinoma	LUAD	Used in CUPiD
TCGA-50-5066-02	TCGA	LUAD	Lung Adenocarcinoma	NotUsed	Recurrent Tumour
TCGA-50-5068-01	TCGA	LUAD	Lung Adenocarcinoma	LUAD	Used in CUPiD
TCGA-50-5072-01	TCGA	LUAD	Lung Adenocarcinoma	LUAD	Used in CUPiD
TCGA-50-5930-01	TCGA	LUAD	Lung Adenocarcinoma	LUAD	Used in CUPiD
TCGA-50-5930-11	TCGA	LUAD	Lung Adenocarcinoma	Normal Tissue	Adjacent Normal
TCGA-50-5931-01	TCGA	LUAD	Lung Adenocarcinoma	LUAD	Used in CUPiD
TCGA-50-5931-11	TCGA	LUAD	Lung Adenocarcinoma	Normal Tissue	Adjacent Normal
TCGA-50-5932-01	TCGA	LUAD	Lung Adenocarcinoma	LUAD	Used in CUPiD
TCGA-50-5932-11	TCGA	LUAD	Lung Adenocarcinoma	Normal Tissue	Adjacent Normal
TCGA-50-5933-01	TCGA	LUAD	Lung Adenocarcinoma	LUAD	Used in CUPiD
TCGA-50-5933-11	TCGA	LUAD	Lung Adenocarcinoma	Normal Tissue	Adjacent Normal
TCGA-50-5935-01	TCGA	LUAD	Lung Adenocarcinoma	LUAD	Used in CUPiD
TCGA-50-5935-11	TCGA	LUAD	Lung Adenocarcinoma	Normal Tissue	Adjacent Normal
TCGA-50-5936-01	TCGA	LUAD	Lung Adenocarcinoma	LUAD	Used in CUPiD
TCGA-50-5936-11	TCGA	LUAD	Lung Adenocarcinoma	Normal Tissue	Adjacent Normal
TCGA-50-5939-01	TCGA	LUAD	Lung Adenocarcinoma	LUAD	Used in CUPiD
TCGA-50-5939-11	TCGA	LUAD	Lung Adenocarcinoma	Normal Tissue	Adjacent Normal
TCGA-50-5941-01	TCGA	LUAD	Lung Adenocarcinoma	LUAD	Used in CUPiD
TCGA-50-5942-01	TCGA	LUAD	Lung Adenocarcinoma	LUAD	Used in CUPiD
TCGA-50-5944-01	TCGA	LUAD	Lung Adenocarcinoma	LUAD	Used in CUPiD
TCGA-50-5946-01	TCGA	LUAD	Lung Adenocarcinoma	LUAD	Used in CUPiD
TCGA-50-5946-02	TCGA	LUAD	Lung Adenocarcinoma	NotUsed	Recurrent Tumour
TCGA-50-6590-01	TCGA	LUAD	Lung Adenocarcinoma	LUAD	Used in CUPiD
TCGA-50-6591-01	TCGA	LUAD	Lung Adenocarcinoma	LUAD	Used in CUPiD
TCGA-50-6591-11	TCGA	LUAD	Lung Adenocarcinoma	Normal Tissue	Adjacent Normal
TCGA-50-6592-01	TCGA	LUAD	Lung Adenocarcinoma	LUAD	Used in CUPiD
TCGA-50-6592-11	TCGA	LUAD	Lung Adenocarcinoma	Normal Tissue	Adjacent Normal
TCGA-50-6593-01	TCGA	LUAD	Lung Adenocarcinoma	LUAD	Used in CUPiD
TCGA-50-6593-11	TCGA	LUAD	Lung Adenocarcinoma	Normal Tissue	Adjacent Normal
TCGA-50-6594-01	TCGA	LUAD	Lung Adenocarcinoma	LUAD	Used in CUPiD
TCGA-50-6594-11	TCGA	LUAD	Lung Adenocarcinoma	Normal Tissue	Adjacent Normal
TCGA-50-6595-01	TCGA	LUAD	Lung Adenocarcinoma	LUAD	Used in CUPiD
TCGA-50-6597-01	TCGA	LUAD	Lung Adenocarcinoma	LUAD	Used in CUPiD
TCGA-50-6673-01	TCGA	LUAD	Lung Adenocarcinoma	LUAD	Used in CUPiD
TCGA-50-7109-01	TCGA	LUAD	Lung Adenocarcinoma	LUAD	Used in CUPiD
TCGA-50-8457-01	TCGA	LUAD	Lung Adenocarcinoma	LUAD	Used in CUPiD
TCGA-50-8459-01	TCGA	LUAD	Lung Adenocarcinoma	LUAD	Used in CUPiD
TCGA-50-8460-01	TCGA	LUAD	Lung Adenocarcinoma	LUAD	Used in CUPiD
TCGA-51-6867-01	TCGA	LUSC	Lung Squamous Cell Carcinoma	LUSC	Used in CUPiD
TCGA-52-7622-01	TCGA	LUSC	Lung Squamous Cell Carcinoma	LUSC	Used in CUPiD
TCGA-52-7809-01	TCGA	LUSC	Lung Squamous Cell Carcinoma	LUSC	Used in CUPiD
TCGA-52-7810-01	TCGA	LUSC	Lung Squamous Cell Carcinoma	LUSC	Used in CUPiD
TCGA-52-7811-01	TCGA	LUSC	Lung Squamous Cell Carcinoma	LUSC	Used in CUPiD
TCGA-52-7812-01	TCGA	LUSC	Lung Squamous Cell Carcinoma	LUSC	Used in CUPiD
TCGA-53-7624-01	TCGA	LUAD	Lung Adenocarcinoma	LUAD	Used in CUPiD
TCGA-53-7626-01	TCGA	LUAD	Lung Adenocarcinoma	LUAD	Used in CUPiD
TCGA-53-7813-01	TCGA	LUAD	Lung Adenocarcinoma	LUAD	Used in CUPiD
TCGA-53-A4EZ-01	TCGA	LUAD	Lung Adenocarcinoma	LUAD	Used in CUPiD
TCGA-55-5899-01	TCGA	LUAD	Lung Adenocarcinoma	LUAD	Used in CUPiD
TCGA-55-6543-01	TCGA	LUAD	Lung Adenocarcinoma	LUAD	Used in CUPiD
TCGA-55-6642-01	TCGA	LUAD	Lung Adenocarcinoma	LUAD	Used in CUPiD
TCGA-55-6712-01	TCGA	LUAD	Lung Adenocarcinoma	LUAD	Used in CUPiD
TCGA-55-6968-01	TCGA	LUAD	Lung Adenocarcinoma	LUAD	Used in CUPiD
TCGA-55-6969-01	TCGA	LUAD	Lung Adenocarcinoma	LUAD	Used in CUPiD
TCGA-55-6970-01	TCGA	LUAD	Lung Adenocarcinoma	LUAD	Used in CUPiD
TCGA-55-6971-01	TCGA	LUAD	Lung Adenocarcinoma	LUAD	Used in CUPiD
TCGA-55-6972-01	TCGA	LUAD	Lung Adenocarcinoma	LUAD	Used in CUPiD
TCGA-55-6975-01	TCGA	LUAD	Lung Adenocarcinoma	LUAD	Used in CUPiD
TCGA-55-6978-01	TCGA	LUAD	Lung Adenocarcinoma	LUAD	Used in CUPiD
TCGA-55-6979-01	TCGA	LUAD	Lung Adenocarcinoma	LUAD	Used in CUPiD
TCGA-55-6980-01	TCGA	LUAD	Lung Adenocarcinoma	LUAD	Used in CUPiD
TCGA-55-6981-01	TCGA	LUAD	Lung Adenocarcinoma	LUAD	Used in CUPiD
TCGA-55-6982-01	TCGA	LUAD	Lung Adenocarcinoma	LUAD	Used in CUPiD
TCGA-55-6983-01	TCGA	LUAD	Lung Adenocarcinoma	LUAD	Used in CUPiD
TCGA-55-6984-01	TCGA	LUAD	Lung Adenocarcinoma	LUAD	Used in CUPiD
TCGA-55-6985-01	TCGA	LUAD	Lung Adenocarcinoma	LUAD	Used in CUPiD
TCGA-55-6986-01	TCGA	LUAD	Lung Adenocarcinoma	LUAD	Used in CUPiD
TCGA-55-6987-01	TCGA	LUAD	Lung Adenocarcinoma	LUAD	Used in CUPiD
TCGA-55-7227-01	TCGA	LUAD	Lung Adenocarcinoma	LUAD	Used in CUPiD
TCGA-55-7281-01	TCGA	LUAD	Lung Adenocarcinoma	LUAD	Used in CUPiD
TCGA-55-7283-01	TCGA	LUAD	Lung Adenocarcinoma	LUAD	Used in CUPiD
TCGA-55-7284-01	TCGA	LUAD	Lung Adenocarcinoma	LUAD	Used in CUPiD
TCGA-55-7570-01	TCGA	LUAD	Lung Adenocarcinoma	LUAD	Used in CUPiD
TCGA-55-7573-01	TCGA	LUAD	Lung Adenocarcinoma	LUAD	Used in CUPiD
TCGA-55-7574-01	TCGA	LUAD	Lung Adenocarcinoma	LUAD	Used in CUPiD
TCGA-55-7576-01	TCGA	LUAD	Lung Adenocarcinoma	LUAD	Used in CUPiD
TCGA-55-7724-01	TCGA	LUAD	Lung Adenocarcinoma	LUAD	Used in CUPiD
TCGA-55-7725-01	TCGA	LUAD	Lung Adenocarcinoma	LUAD	Used in CUPiD
TCGA-55-7726-01	TCGA	LUAD	Lung Adenocarcinoma	LUAD	Used in CUPiD
TCGA-55-7727-01	TCGA	LUAD	Lung Adenocarcinoma	LUAD	Used in CUPiD
TCGA-55-7728-01	TCGA	LUAD	Lung Adenocarcinoma	LUAD	Used in CUPiD
TCGA-55-7815-01	TCGA	LUAD	Lung Adenocarcinoma	LUAD	Used in CUPiD
TCGA-55-7816-01	TCGA	LUAD	Lung Adenocarcinoma	LUAD	Used in CUPiD
TCGA-55-7903-01	TCGA	LUAD	Lung Adenocarcinoma	LUAD	Used in CUPiD
TCGA-55-7907-01	TCGA	LUAD	Lung Adenocarcinoma	LUAD	Used in CUPiD
TCGA-55-7910-01	TCGA	LUAD	Lung Adenocarcinoma	LUAD	Used in CUPiD
TCGA-55-7911-01	TCGA	LUAD	Lung Adenocarcinoma	LUAD	Used in CUPiD
TCGA-55-7913-01	TCGA	LUAD	Lung Adenocarcinoma	LUAD	Used in CUPiD
TCGA-55-7914-01	TCGA	LUAD	Lung Adenocarcinoma	LUAD	Used in CUPiD
TCGA-55-7994-01	TCGA	LUAD	Lung Adenocarcinoma	LUAD	Used in CUPiD
TCGA-55-7995-01	TCGA	LUAD	Lung Adenocarcinoma	LUAD	Used in CUPiD
TCGA-55-8085-01	TCGA	LUAD	Lung Adenocarcinoma	LUAD	Used in CUPiD
TCGA-55-8087-01	TCGA	LUAD	Lung Adenocarcinoma	LUAD	Used in CUPiD
TCGA-55-8089-01	TCGA	LUAD	Lung Adenocarcinoma	LUAD	Used in CUPiD
TCGA-55-8090-01	TCGA	LUAD	Lung Adenocarcinoma	LUAD	Used in CUPiD
TCGA-55-8091-01	TCGA	LUAD	Lung Adenocarcinoma	LUAD	Used in CUPiD
TCGA-55-8092-01	TCGA	LUAD	Lung Adenocarcinoma	LUAD	Used in CUPiD
TCGA-55-8094-01	TCGA	LUAD	Lung Adenocarcinoma	LUAD	Used in CUPiD
TCGA-55-8096-01	TCGA	LUAD	Lung Adenocarcinoma	LUAD	Used in CUPiD
TCGA-55-8097-01	TCGA	LUAD	Lung Adenocarcinoma	LUAD	Used in CUPiD
TCGA-55-8203-01	TCGA	LUAD	Lung Adenocarcinoma	LUAD	Used in CUPiD
TCGA-55-8204-01	TCGA	LUAD	Lung Adenocarcinoma	LUAD	Used in CUPiD
TCGA-55-8205-01	TCGA	LUAD	Lung Adenocarcinoma	LUAD	Used in CUPiD
TCGA-55-8206-01	TCGA	LUAD	Lung Adenocarcinoma	LUAD	Used in CUPiD
TCGA-55-8207-01	TCGA	LUAD	Lung Adenocarcinoma	LUAD	Used in CUPiD
TCGA-55-8208-01	TCGA	LUAD	Lung Adenocarcinoma	LUAD	Used in CUPiD
TCGA-55-8299-01	TCGA	LUAD	Lung Adenocarcinoma	LUAD	Used in CUPiD
TCGA-55-8301-01	TCGA	LUAD	Lung Adenocarcinoma	LUAD	Used in CUPiD
TCGA-55-8302-01	TCGA	LUAD	Lung Adenocarcinoma	LUAD	Used in CUPiD
TCGA-55-8505-01	TCGA	LUAD	Lung Adenocarcinoma	LUAD	Used in CUPiD
TCGA-55-8506-01	TCGA	LUAD	Lung Adenocarcinoma	LUAD	Used in CUPiD
TCGA-55-8507-01	TCGA	LUAD	Lung Adenocarcinoma	LUAD	Used in CUPiD
TCGA-55-8508-01	TCGA	LUAD	Lung Adenocarcinoma	LUAD	Used in CUPiD
TCGA-55-8510-01	TCGA	LUAD	Lung Adenocarcinoma	LUAD	Used in CUPiD
TCGA-55-8511-01	TCGA	LUAD	Lung Adenocarcinoma	LUAD	Used in CUPiD
TCGA-55-8512-01	TCGA	LUAD	Lung Adenocarcinoma	LUAD	Used in CUPiD
TCGA-55-8513-01	TCGA	LUAD	Lung Adenocarcinoma	LUAD	Used in CUPiD
TCGA-55-8514-01	TCGA	LUAD	Lung Adenocarcinoma	LUAD	Used in CUPiD
TCGA-55-8614-01	TCGA	LUAD	Lung Adenocarcinoma	LUAD	Used in CUPiD
TCGA-55-8615-01	TCGA	LUAD	Lung Adenocarcinoma	LUAD	Used in CUPiD
TCGA-55-8616-01	TCGA	LUAD	Lung Adenocarcinoma	LUAD	Used in CUPiD
TCGA-55-8619-01	TCGA	LUAD	Lung Adenocarcinoma	LUAD	Used in CUPiD
TCGA-55-8620-01	TCGA	LUAD	Lung Adenocarcinoma	LUAD	Used in CUPiD
TCGA-55-8621-01	TCGA	LUAD	Lung Adenocarcinoma	LUAD	Used in CUPiD
TCGA-55-A48X-01	TCGA	LUAD	Lung Adenocarcinoma	LUAD	Used in CUPiD
TCGA-55-A48Y-01	TCGA	LUAD	Lung Adenocarcinoma	LUAD	Used in CUPiD
TCGA-55-A48Z-01	TCGA	LUAD	Lung Adenocarcinoma	LUAD	Used in CUPiD
TCGA-55-A490-01	TCGA	LUAD	Lung Adenocarcinoma	LUAD	Used in CUPiD
TCGA-55-A491-01	TCGA	LUAD	Lung Adenocarcinoma	LUAD	Used in CUPiD
TCGA-55-A492-01	TCGA	LUAD	Lung Adenocarcinoma	LUAD	Used in CUPiD
TCGA-55-A493-01	TCGA	LUAD	Lung Adenocarcinoma	LUAD	Used in CUPiD
TCGA-55-A494-01	TCGA	LUAD	Lung Adenocarcinoma	LUAD	Used in CUPiD
TCGA-55-A4DF-01	TCGA	LUAD	Lung Adenocarcinoma	LUAD	Used in CUPiD
TCGA-55-A4DG-01	TCGA	LUAD	Lung Adenocarcinoma	LUAD	Used in CUPiD
TCGA-55-A57B-01	TCGA	LUAD	Lung Adenocarcinoma	LUAD	Used in CUPiD
TCGA-56-5897-01	TCGA	LUSC	Lung Squamous Cell Carcinoma	LUSC	Used in CUPiD
TCGA-56-5898-01	TCGA	LUSC	Lung Squamous Cell Carcinoma	LUSC	Used in CUPiD
TCGA-56-6545-01	TCGA	LUSC	Lung Squamous Cell Carcinoma	LUSC	Used in CUPiD
TCGA-56-6546-01	TCGA	LUSC	Lung Squamous Cell Carcinoma	LUSC	Used in CUPiD
TCGA-56-7221-01	TCGA	LUSC	Lung Squamous Cell Carcinoma	LUSC	Used in CUPiD
TCGA-56-7222-01	TCGA	LUSC	Lung Squamous Cell Carcinoma	LUSC	Used in CUPiD
TCGA-56-7223-01	TCGA	LUSC	Lung Squamous Cell Carcinoma	LUSC	Used in CUPiD
TCGA-56-7579-01	TCGA	LUSC	Lung Squamous Cell Carcinoma	LUSC	Used in CUPiD
TCGA-56-7580-01	TCGA	LUSC	Lung Squamous Cell Carcinoma	LUSC	Used in CUPiD
TCGA-56-7582-01	TCGA	LUSC	Lung Squamous Cell Carcinoma	LUSC	Used in CUPiD
TCGA-56-7730-01	TCGA	LUSC	Lung Squamous Cell Carcinoma	LUSC	Used in CUPiD
TCGA-56-7731-01	TCGA	LUSC	Lung Squamous Cell Carcinoma	LUSC	Used in CUPiD
TCGA-56-7822-01	TCGA	LUSC	Lung Squamous Cell Carcinoma	LUSC	Used in CUPiD
TCGA-56-7823-01	TCGA	LUSC	Lung Squamous Cell Carcinoma	LUSC	Used in CUPiD
TCGA-56-8082-01	TCGA	LUSC	Lung Squamous Cell Carcinoma	LUSC	Used in CUPiD
TCGA-56-8083-01	TCGA	LUSC	Lung Squamous Cell Carcinoma	LUSC	Used in CUPiD
TCGA-56-8201-01	TCGA	LUSC	Lung Squamous Cell Carcinoma	LUSC	Used in CUPiD
TCGA-56-8304-01	TCGA	LUSC	Lung Squamous Cell Carcinoma	LUSC	Used in CUPiD
TCGA-56-8305-01	TCGA	LUSC	Lung Squamous Cell Carcinoma	LUSC	Used in CUPiD
TCGA-56-8307-01	TCGA	LUSC	Lung Squamous Cell Carcinoma	LUSC	Used in CUPiD
TCGA-56-8308-01	TCGA	LUSC	Lung Squamous Cell Carcinoma	LUSC	Used in CUPiD
TCGA-56-8309-01	TCGA	LUSC	Lung Squamous Cell Carcinoma	LUSC	Used in CUPiD
TCGA-56-8503-01	TCGA	LUSC	Lung Squamous Cell Carcinoma	LUSC	Used in CUPiD
TCGA-56-8504-01	TCGA	LUSC	Lung Squamous Cell Carcinoma	LUSC	Used in CUPiD
TCGA-56-8622-01	TCGA	LUSC	Lung Squamous Cell Carcinoma	LUSC	Used in CUPiD
TCGA-56-8623-01	TCGA	LUSC	Lung Squamous Cell Carcinoma	LUSC	Used in CUPiD
TCGA-56-8624-01	TCGA	LUSC	Lung Squamous Cell Carcinoma	LUSC	Used in CUPiD
TCGA-56-8625-01	TCGA	LUSC	Lung Squamous Cell Carcinoma	LUSC	Used in CUPiD
TCGA-56-8626-01	TCGA	LUSC	Lung Squamous Cell Carcinoma	LUSC	Used in CUPiD
TCGA-56-8628-01	TCGA	LUSC	Lung Squamous Cell Carcinoma	LUSC	Used in CUPiD
TCGA-56-8629-01	TCGA	LUSC	Lung Squamous Cell Carcinoma	LUSC	Used in CUPiD
TCGA-56-A49D-01	TCGA	LUSC	Lung Squamous Cell Carcinoma	LUSC	Used in CUPiD
TCGA-56-A4BW-01	TCGA	LUSC	Lung Squamous Cell Carcinoma	LUSC	Used in CUPiD
TCGA-56-A4BX-01	TCGA	LUSC	Lung Squamous Cell Carcinoma	LUSC	Used in CUPiD
TCGA-56-A4BY-01	TCGA	LUSC	Lung Squamous Cell Carcinoma	LUSC	Used in CUPiD
TCGA-56-A4ZJ-01	TCGA	LUSC	Lung Squamous Cell Carcinoma	LUSC	Used in CUPiD
TCGA-56-A4ZK-01	TCGA	LUSC	Lung Squamous Cell Carcinoma	LUSC	Used in CUPiD
TCGA-56-A5DR-01	TCGA	LUSC	Lung Squamous Cell Carcinoma	LUSC	Used in CUPiD
TCGA-56-A5DS-01	TCGA	LUSC	Lung Squamous Cell Carcinoma	LUSC	Used in CUPiD
TCGA-56-A62T-01	TCGA	LUSC	Lung Squamous Cell Carcinoma	LUSC	Used in CUPiD
TCGA-58-8386-01	TCGA	LUSC	Lung Squamous Cell Carcinoma	LUSC	Used in CUPiD
TCGA-58-8387-01	TCGA	LUSC	Lung Squamous Cell Carcinoma	LUSC	Used in CUPiD
TCGA-58-8388-01	TCGA	LUSC	Lung Squamous Cell Carcinoma	LUSC	Used in CUPiD
TCGA-58-8390-01	TCGA	LUSC	Lung Squamous Cell Carcinoma	LUSC	Used in CUPiD
TCGA-58-8391-01	TCGA	LUSC	Lung Squamous Cell Carcinoma	LUSC	Used in CUPiD
TCGA-58-8392-01	TCGA	LUSC	Lung Squamous Cell Carcinoma	LUSC	Used in CUPiD
TCGA-58-8393-01	TCGA	LUSC	Lung Squamous Cell Carcinoma	LUSC	Used in CUPiD
TCGA-58-A46J-01	TCGA	LUSC	Lung Squamous Cell Carcinoma	LUSC	Used in CUPiD
TCGA-58-A46K-01	TCGA	LUSC	Lung Squamous Cell Carcinoma	LUSC	Used in CUPiD
TCGA-58-A46L-01	TCGA	LUSC	Lung Squamous Cell Carcinoma	LUSC	Used in CUPiD
TCGA-58-A46M-01	TCGA	LUSC	Lung Squamous Cell Carcinoma	LUSC	Used in CUPiD
TCGA-58-A46N-01	TCGA	LUSC	Lung Squamous Cell Carcinoma	LUSC	Used in CUPiD
TCGA-59-A5PD-01	TCGA	OV	Serous Cystadenocarcinoma	Gynae	Used in CUPiD
TCGA-5B-A90C-01	TCGA	UCEC	Endometrioid endometrial adenocarcinoma	Gynae	Used in CUPiD
TCGA-5C-A9VG-01	TCGA	LIHC	Hepatocellular Carcinoma	LIHC	Used in CUPiD
TCGA-5C-A9VH-01	TCGA	LIHC	Hepatocellular Carcinoma	LIHC	Used in CUPiD
TCGA-5C-AAPD-01	TCGA	LIHC	Hepatocholangiocarcinoma (Mixed)	NotUsed	Mixed Class
TCGA-5G-A9ZZ-01	TCGA	THYM	Thymoma; Type C	THYM	Used in CUPiD
TCGA-5K-AAAP-01	TCGA	THYM	Thymoma; Type A	THYM	Used in CUPiD
TCGA-5L-AAT0-01	TCGA	BRCA	Infiltrating Lobular Carcinoma	BRCA	Used in CUPiD
TCGA-5M-AAT4-01	TCGA	COAD	Colon Adenocarcinoma	LowerGI	Used in CUPiD
TCGA-5M-AAT5-01	TCGA	COAD	NA	LowerGI	Used in CUPiD
TCGA-5M-AAT6-01	TCGA	COAD	Colon Adenocarcinoma	LowerGI	Used in CUPiD
TCGA-5M-AATA-01	TCGA	COAD	NA	LowerGI	Used in CUPiD
TCGA-5M-AATE-01	TCGA	COAD	Colon Adenocarcinoma	LowerGI	Used in CUPiD
TCGA-5N-A9KI-01	TCGA	BLCA	Muscle invasive urothelial carcinoma (pT2 or above)	BLCA	Used in CUPiD
TCGA-5N-A9KM-01	TCGA	BLCA	Muscle invasive urothelial carcinoma (pT2 or above)	BLCA	Used in CUPiD
TCGA-5P-A9JU-01	TCGA	KIRP	Kidney Papillary Renal Cell Carcinoma	KIRP	Used in CUPiD
TCGA-5P-A9JV-01	TCGA	KIRP	Kidney Papillary Renal Cell Carcinoma	KIRP	Used in CUPiD
TCGA-5P-A9JW-01	TCGA	KIRP	Kidney Papillary Renal Cell Carcinoma	KIRP	Used in CUPiD
TCGA-5P-A9JY-01	TCGA	KIRP	Kidney Papillary Renal Cell Carcinoma	KIRP	Used in CUPiD
TCGA-5P-A9JZ-01	TCGA	KIRP	Kidney Papillary Renal Cell Carcinoma	KIRP	Used in CUPiD
TCGA-5P-A9K0-01	TCGA	KIRP	Kidney Papillary Renal Cell Carcinoma	KIRP	Used in CUPiD
TCGA-5P-A9K2-01	TCGA	KIRP	Kidney Papillary Renal Cell Carcinoma	KIRP	Used in CUPiD
TCGA-5P-A9K3-01	TCGA	KIRP	Kidney Papillary Renal Cell Carcinoma	KIRP	Used in CUPiD
TCGA-5P-A9K4-01	TCGA	KIRP	Kidney Papillary Renal Cell Carcinoma	KIRP	Used in CUPiD
TCGA-5P-A9K6-01	TCGA	KIRP	Kidney Papillary Renal Cell Carcinoma	KIRP	Used in CUPiD
TCGA-5P-A9K8-01	TCGA	KIRP	Kidney Papillary Renal Cell Carcinoma	KIRP	Used in CUPiD
TCGA-5P-A9K9-01	TCGA	KIRP	Kidney Papillary Renal Cell Carcinoma	KIRP	Used in CUPiD
TCGA-5P-A9KA-01	TCGA	KIRP	Kidney Papillary Renal Cell Carcinoma	KIRP	Used in CUPiD
TCGA-5P-A9KC-01	TCGA	KIRP	Kidney Papillary Renal Cell Carcinoma	KIRP	Used in CUPiD
TCGA-5P-A9KE-01	TCGA	KIRP	Kidney Papillary Renal Cell Carcinoma	KIRP	Used in CUPiD
TCGA-5P-A9KF-01	TCGA	KIRP	Kidney Papillary Renal Cell Carcinoma	KIRP	Used in CUPiD
TCGA-5P-A9KH-01	TCGA	KIRP	Kidney Papillary Renal Cell Carcinoma	KIRP	Used in CUPiD
TCGA-5R-AA1C-01	TCGA	LIHC	Hepatocellular Carcinoma	LIHC	Used in CUPiD
TCGA-5R-AA1D-01	TCGA	LIHC	Hepatocellular Carcinoma	LIHC	Used in CUPiD
TCGA-5R-AAAM-01	TCGA	LIHC	Hepatocellular Carcinoma	LIHC	Used in CUPiD
TCGA-5S-A9Q8-01	TCGA	UCEC	Endometrioid endometrial adenocarcinoma	Gynae	Used in CUPiD
TCGA-5T-A9QA-01	TCGA	BRCA	Other, specify	BRCA	Used in CUPiD
TCGA-5U-AB0D-01	TCGA	THYM	Thymoma; Type C	THYM	Used in CUPiD
TCGA-5U-AB0E-01	TCGA	THYM	Thymoma; Type B3	THYM	Used in CUPiD
TCGA-5U-AB0F-01	TCGA	THYM	Thymoma; Type AB	THYM	Used in CUPiD
TCGA-5V-A9RR-01	TCGA	THYM	Thymoma; Type AB	THYM	Used in CUPiD
TCGA-5X-AA5U-01	TCGA	OV	Serous Cystadenocarcinoma	Gynae	Used in CUPiD
TCGA-60-2697-01	TCGA	LUSC	Lung Squamous Cell Carcinoma	LUSC	Used in CUPiD
TCGA-60-2703-01	TCGA	LUSC	Lung Squamous Cell Carcinoma	LUSC	Used in CUPiD
TCGA-60-2704-01	TCGA	LUSC	Lung Squamous Cell Carcinoma	LUSC	Used in CUPiD
TCGA-60-2709-01	TCGA	LUSC	Lung Squamous Cell Carcinoma	LUSC	Used in CUPiD
TCGA-62-8394-01	TCGA	LUAD	Lung Adenocarcinoma	LUAD	Used in CUPiD
TCGA-62-8395-01	TCGA	LUAD	Lung Adenocarcinoma	LUAD	Used in CUPiD
TCGA-62-8397-01	TCGA	LUAD	Lung Adenocarcinoma	LUAD	Used in CUPiD
TCGA-62-8398-01	TCGA	LUAD	Lung Adenocarcinoma	LUAD	Used in CUPiD
TCGA-62-8399-01	TCGA	LUAD	Lung Adenocarcinoma	LUAD	Used in CUPiD
TCGA-62-8402-01	TCGA	LUAD	Lung Adenocarcinoma	LUAD	Used in CUPiD
TCGA-62-A46O-01	TCGA	LUAD	Lung Adenocarcinoma	LUAD	Used in CUPiD
TCGA-62-A46P-01	TCGA	LUAD	Lung Adenocarcinoma	LUAD	Used in CUPiD
TCGA-62-A46R-01	TCGA	LUAD	Lung Adenocarcinoma	LUAD	Used in CUPiD
TCGA-62-A46S-01	TCGA	LUAD	Lung Adenocarcinoma	LUAD	Used in CUPiD
TCGA-62-A46U-01	TCGA	LUAD	Lung Adenocarcinoma	LUAD	Used in CUPiD
TCGA-62-A46V-01	TCGA	LUAD	Lung Adenocarcinoma	LUAD	Used in CUPiD
TCGA-62-A46Y-01	TCGA	LUAD	Lung Adenocarcinoma	LUAD	Used in CUPiD
TCGA-62-A470-01	TCGA	LUAD	Lung Adenocarcinoma	LUAD	Used in CUPiD
TCGA-62-A471-01	TCGA	LUAD	Lung Adenocarcinoma	LUAD	Used in CUPiD
TCGA-62-A472-01	TCGA	LUAD	Lung Adenocarcinoma	LUAD	Used in CUPiD
TCGA-63-5128-01	TCGA	LUSC	Lung Squamous Cell Carcinoma	LUSC	Used in CUPiD
TCGA-63-5131-01	TCGA	LUSC	Lung Squamous Cell Carcinoma	LUSC	Used in CUPiD
TCGA-63-6202-01	TCGA	LUSC	Lung Squamous Cell Carcinoma	LUSC	Used in CUPiD
TCGA-63-7020-01	TCGA	LUSC	Lung Squamous Cell Carcinoma	LUSC	Used in CUPiD
TCGA-63-7021-01	TCGA	LUSC	Lung Squamous Cell Carcinoma	LUSC	Used in CUPiD
TCGA-63-7022-01	TCGA	LUSC	Lung Squamous Cell Carcinoma	LUSC	Used in CUPiD
TCGA-63-7023-01	TCGA	LUSC	Lung Squamous Cell Carcinoma	LUSC	Used in CUPiD
TCGA-63-A5M9-01	TCGA	LUSC	Lung Squamous Cell Carcinoma	LUSC	Used in CUPiD
TCGA-63-A5MB-01	TCGA	LUSC	Lung Squamous Cell Carcinoma	LUSC	Used in CUPiD
TCGA-63-A5MG-01	TCGA	LUSC	Lung Squamous Cell Carcinoma	LUSC	Used in CUPiD
TCGA-63-A5MH-01	TCGA	LUSC	Lung Squamous Cell Carcinoma	LUSC	Used in CUPiD
TCGA-63-A5MI-01	TCGA	LUSC	Lung Squamous Cell Carcinoma	LUSC	Used in CUPiD
TCGA-63-A5MJ-01	TCGA	LUSC	Lung Squamous Cell Carcinoma	LUSC	Used in CUPiD
TCGA-63-A5ML-01	TCGA	LUSC	Lung Squamous Cell Carcinoma	LUSC	Used in CUPiD
TCGA-63-A5MM-01	TCGA	LUSC	Lung Squamous Cell Carcinoma	LUSC	Used in CUPiD
TCGA-63-A5MN-01	TCGA	LUSC	Lung Squamous Cell Carcinoma	LUSC	Used in CUPiD
TCGA-63-A5MP-01	TCGA	LUSC	Lung Squamous Cell Carcinoma	LUSC	Used in CUPiD
TCGA-63-A5MR-01	TCGA	LUSC	Lung Squamous Cell Carcinoma	LUSC	Used in CUPiD
TCGA-63-A5MS-01	TCGA	LUSC	Lung Squamous Cell Carcinoma	LUSC	Used in CUPiD
TCGA-63-A5MT-01	TCGA	LUSC	Lung Squamous Cell Carcinoma	LUSC	Used in CUPiD
TCGA-63-A5MU-01	TCGA	LUSC	Lung Squamous Cell Carcinoma	LUSC	Used in CUPiD
TCGA-63-A5MV-01	TCGA	LUSC	Lung Squamous Cell Carcinoma	LUSC	Used in CUPiD
TCGA-63-A5MW-01	TCGA	LUSC	Lung Squamous Cell Carcinoma	LUSC	Used in CUPiD
TCGA-63-A5MY-01	TCGA	LUSC	Lung Squamous Cell Carcinoma	LUSC	Used in CUPiD
TCGA-64-1679-01	TCGA	LUAD	Lung Adenocarcinoma	LUAD	Used in CUPiD
TCGA-64-1681-01	TCGA	LUAD	Lung Adenocarcinoma	LUAD	Used in CUPiD
TCGA-64-5774-01	TCGA	LUAD	Lung Adenocarcinoma	LUAD	Used in CUPiD
TCGA-64-5775-01	TCGA	LUAD	Lung Adenocarcinoma	LUAD	Used in CUPiD
TCGA-64-5778-01	TCGA	LUAD	Lung Adenocarcinoma	LUAD	Used in CUPiD
TCGA-64-5779-01	TCGA	LUAD	Lung Adenocarcinoma	LUAD	Used in CUPiD
TCGA-64-5781-01	TCGA	LUAD	Lung Adenocarcinoma	LUAD	Used in CUPiD
TCGA-64-5815-01	TCGA	LUAD	Lung Adenocarcinoma	LUAD	Used in CUPiD
TCGA-67-4679-01	TCGA	LUAD	Lung Adenocarcinoma	LUAD	Used in CUPiD
TCGA-67-6215-01	TCGA	LUAD	Lung Adenocarcinoma	LUAD	Used in CUPiD
TCGA-67-6216-01	TCGA	LUAD	Lung Adenocarcinoma	LUAD	Used in CUPiD
TCGA-67-6217-01	TCGA	LUAD	Lung Adenocarcinoma	LUAD	Used in CUPiD
TCGA-68-7755-01	TCGA	LUSC	Lung Squamous Cell Carcinoma	LUSC	Used in CUPiD
TCGA-68-7756-01	TCGA	LUSC	Lung Squamous Cell Carcinoma	LUSC	Used in CUPiD
TCGA-68-7757-01	TCGA	LUSC	Lung Squamous Cell Carcinoma	LUSC	Used in CUPiD
TCGA-68-8250-01	TCGA	LUSC	Lung Squamous Cell Carcinoma	LUSC	Used in CUPiD
TCGA-68-8251-01	TCGA	LUSC	Lung Squamous Cell Carcinoma	LUSC	Used in CUPiD
TCGA-68-A59I-01	TCGA	LUSC	Lung Squamous Cell Carcinoma	LUSC	Used in CUPiD
TCGA-68-A59J-01	TCGA	LUSC	Lung Squamous Cell Carcinoma	LUSC	Used in CUPiD
TCGA-69-7760-01	TCGA	LUAD	Lung Adenocarcinoma	LUAD	Used in CUPiD
TCGA-69-7761-01	TCGA	LUAD	Lung Adenocarcinoma	LUAD	Used in CUPiD
TCGA-69-7763-01	TCGA	LUAD	Lung Adenocarcinoma	LUAD	Used in CUPiD
TCGA-69-7764-01	TCGA	LUAD	Lung Adenocarcinoma	LUAD	Used in CUPiD
TCGA-69-7765-01	TCGA	LUAD	Lung Adenocarcinoma	LUAD	Used in CUPiD
TCGA-69-7973-01	TCGA	LUAD	Lung Adenocarcinoma	LUAD	Used in CUPiD
TCGA-69-7974-01	TCGA	LUAD	Lung Adenocarcinoma	LUAD	Used in CUPiD
TCGA-69-7978-01	TCGA	LUAD	Lung Adenocarcinoma	LUAD	Used in CUPiD
TCGA-69-7979-01	TCGA	LUAD	Lung Adenocarcinoma	LUAD	Used in CUPiD
TCGA-69-7980-01	TCGA	LUAD	Lung Adenocarcinoma	LUAD	Used in CUPiD
TCGA-69-8253-01	TCGA	LUAD	Lung Adenocarcinoma	LUAD	Used in CUPiD
TCGA-69-8254-01	TCGA	LUAD	Lung Adenocarcinoma	LUAD	Used in CUPiD
TCGA-69-8255-01	TCGA	LUAD	Lung Adenocarcinoma	LUAD	Used in CUPiD
TCGA-69-8453-01	TCGA	LUAD	Lung Adenocarcinoma	LUAD	Used in CUPiD
TCGA-69-A59K-01	TCGA	LUAD	Lung Adenocarcinoma	LUAD	Used in CUPiD
TCGA-6A-AB49-01	TCGA	LUSC	Lung Squamous Cell Carcinoma	LUSC	Used in CUPiD
TCGA-6D-AA2E-01	TCGA	KIRC	Kidney Clear Cell Renal Carcinoma	KIRC	Used in CUPiD
TCGA-70-6722-01	TCGA	LUSC	Lung Squamous Cell Carcinoma	LUSC	Used in CUPiD
TCGA-70-6723-01	TCGA	LUSC	Lung Squamous Cell Carcinoma	LUSC	Used in CUPiD
TCGA-71-6725-01	TCGA	LUAD	Lung Adenocarcinoma	LUAD	Used in CUPiD
TCGA-71-8520-01	TCGA	LUAD	Lung Adenocarcinoma	LUAD	Used in CUPiD
TCGA-73-4658-01	TCGA	LUAD	Lung Adenocarcinoma	LUAD	Used in CUPiD
TCGA-73-4658-11	TCGA	LUAD	Lung Adenocarcinoma	Normal Tissue	Adjacent Normal
TCGA-73-4676-01	TCGA	LUAD	Lung Adenocarcinoma	LUAD	Used in CUPiD
TCGA-73-4676-11	TCGA	LUAD	Lung Adenocarcinoma	Normal Tissue	Adjacent Normal
TCGA-73-7498-01	TCGA	LUAD	Lung Adenocarcinoma	LUAD	Used in CUPiD
TCGA-73-7499-01	TCGA	LUAD	Lung Adenocarcinoma	LUAD	Used in CUPiD
TCGA-73-A9RS-01	TCGA	LUAD	Lung Adenocarcinoma	LUAD	Used in CUPiD
TCGA-74-6573-01	TCGA	GBM	Untreated primary (de novo) GBM	GBM	Used in CUPiD
TCGA-74-6573-11	TCGA	GBM	Untreated primary (de novo) GBM	Normal Tissue	Adjacent Normal
TCGA-74-6575-01	TCGA	GBM	Untreated primary (de novo) GBM	GBM	Used in CUPiD
TCGA-74-6577-01	TCGA	GBM	Untreated primary (de novo) GBM	GBM	Used in CUPiD
TCGA-74-6578-01	TCGA	GBM	Untreated primary (de novo) GBM	GBM	Used in CUPiD
TCGA-74-6581-01	TCGA	GBM	Untreated primary (de novo) GBM	GBM	Used in CUPiD
TCGA-74-6584-01	TCGA	GBM	Untreated primary (de novo) GBM	GBM	Used in CUPiD
TCGA-75-5122-01	TCGA	LUAD	Lung Adenocarcinoma	LUAD	Used in CUPiD
TCGA-75-5125-01	TCGA	LUAD	Lung Adenocarcinoma	LUAD	Used in CUPiD
TCGA-75-5126-01	TCGA	LUAD	Lung Adenocarcinoma	LUAD	Used in CUPiD
TCGA-75-5146-01	TCGA	LUAD	Lung Adenocarcinoma	LUAD	Used in CUPiD
TCGA-75-5147-01	TCGA	LUAD	Lung Adenocarcinoma	LUAD	Used in CUPiD
TCGA-75-6203-01	TCGA	LUAD	Lung Adenocarcinoma	LUAD	Used in CUPiD
TCGA-75-6205-01	TCGA	LUAD	Lung Adenocarcinoma	LUAD	Used in CUPiD
TCGA-75-6206-01	TCGA	LUAD	Lung Adenocarcinoma	LUAD	Used in CUPiD
TCGA-75-6207-01	TCGA	LUAD	Lung Adenocarcinoma	LUAD	Used in CUPiD
TCGA-75-6211-01	TCGA	LUAD	Lung Adenocarcinoma	LUAD	Used in CUPiD
TCGA-75-6212-01	TCGA	LUAD	Lung Adenocarcinoma	LUAD	Used in CUPiD
TCGA-75-6214-01	TCGA	LUAD	Lung Adenocarcinoma	LUAD	Used in CUPiD
TCGA-75-7025-01	TCGA	LUAD	Lung Adenocarcinoma	LUAD	Used in CUPiD
TCGA-75-7027-01	TCGA	LUAD	Lung Adenocarcinoma	LUAD	Used in CUPiD
TCGA-75-7030-01	TCGA	LUAD	Lung Adenocarcinoma	LUAD	Used in CUPiD
TCGA-75-7031-01	TCGA	LUAD	Lung Adenocarcinoma	LUAD	Used in CUPiD
TCGA-76-4925-01	TCGA	GBM	Untreated primary (de novo) GBM	GBM	Used in CUPiD
TCGA-76-4926-01	TCGA	GBM	Untreated primary (de novo) GBM	GBM	Used in CUPiD
TCGA-76-4927-01	TCGA	GBM	Untreated primary (de novo) GBM	GBM	Used in CUPiD
TCGA-76-4928-01	TCGA	GBM	Untreated primary (de novo) GBM	GBM	Used in CUPiD
TCGA-76-4929-01	TCGA	GBM	Untreated primary (de novo) GBM	GBM	Used in CUPiD
TCGA-76-4931-01	TCGA	GBM	Untreated primary (de novo) GBM	GBM	Used in CUPiD
TCGA-76-4932-01	TCGA	GBM	Treated primary GBM	GBM	Used in CUPiD
TCGA-76-4934-01	TCGA	GBM	Untreated primary (de novo) GBM	GBM	Used in CUPiD
TCGA-76-4935-01	TCGA	GBM	Untreated primary (de novo) GBM	GBM	Used in CUPiD
TCGA-76-6191-01	TCGA	GBM	Untreated primary (de novo) GBM	GBM	Used in CUPiD
TCGA-76-6192-01	TCGA	GBM	Untreated primary (de novo) GBM	GBM	Used in CUPiD
TCGA-76-6193-01	TCGA	GBM	Untreated primary (de novo) GBM	GBM	Used in CUPiD
TCGA-76-6280-01	TCGA	GBM	Untreated primary (de novo) GBM	GBM	Used in CUPiD
TCGA-76-6282-01	TCGA	GBM	Untreated primary (de novo) GBM	GBM	Used in CUPiD
TCGA-76-6283-01	TCGA	GBM	Glioblastoma Multiforme (GBM)	GBM	Used in CUPiD
TCGA-76-6285-01	TCGA	GBM	Untreated primary (de novo) GBM	GBM	Used in CUPiD
TCGA-76-6286-01	TCGA	GBM	Untreated primary (de novo) GBM	GBM	Used in CUPiD
TCGA-76-6656-01	TCGA	GBM	Untreated primary (de novo) GBM	GBM	Used in CUPiD
TCGA-76-6657-01	TCGA	GBM	Untreated primary (de novo) GBM	GBM	Used in CUPiD
TCGA-76-6660-01	TCGA	GBM	Glioblastoma Multiforme (GBM)	GBM	Used in CUPiD
TCGA-76-6661-01	TCGA	GBM	Untreated primary (de novo) GBM	GBM	Used in CUPiD
TCGA-76-6662-01	TCGA	GBM	Untreated primary (de novo) GBM	GBM	Used in CUPiD
TCGA-76-6663-01	TCGA	GBM	Untreated primary (de novo) GBM	GBM	Used in CUPiD
TCGA-76-6664-01	TCGA	GBM	Untreated primary (de novo) GBM	GBM	Used in CUPiD
TCGA-77-6842-01	TCGA	LUSC	Lung Squamous Cell Carcinoma	LUSC	Used in CUPiD
TCGA-77-6843-01	TCGA	LUSC	Lung Squamous Cell Carcinoma	LUSC	Used in CUPiD
TCGA-77-6844-01	TCGA	LUSC	Lung Squamous Cell Carcinoma	LUSC	Used in CUPiD
TCGA-77-6845-01	TCGA	LUSC	Lung Squamous Cell Carcinoma	LUSC	Used in CUPiD
TCGA-77-7138-01	TCGA	LUSC	Lung Squamous Cell Carcinoma	LUSC	Used in CUPiD
TCGA-77-7139-01	TCGA	LUSC	Lung Squamous Cell Carcinoma	LUSC	Used in CUPiD
TCGA-77-7140-01	TCGA	LUSC	Lung Squamous Cell Carcinoma	LUSC	Used in CUPiD
TCGA-77-7141-01	TCGA	LUSC	Lung Squamous Cell Carcinoma	LUSC	Used in CUPiD
TCGA-77-7142-01	TCGA	LUSC	Lung Squamous Cell Carcinoma	LUSC	Used in CUPiD
TCGA-77-7335-01	TCGA	LUSC	Lung Squamous Cell Carcinoma	LUSC	Used in CUPiD
TCGA-77-7337-01	TCGA	LUSC	Lung Squamous Cell Carcinoma	LUSC	Used in CUPiD
TCGA-77-7338-01	TCGA	LUSC	Lung Squamous Cell Carcinoma	LUSC	Used in CUPiD
TCGA-77-7463-01	TCGA	LUSC	Lung Squamous Cell Carcinoma	LUSC	Used in CUPiD
TCGA-77-7465-01	TCGA	LUSC	Lung Squamous Cell Carcinoma	LUSC	Used in CUPiD
TCGA-77-8007-01	TCGA	LUSC	Lung Squamous Cell Carcinoma	LUSC	Used in CUPiD
TCGA-77-8008-01	TCGA	LUSC	Lung Squamous Cell Carcinoma	LUSC	Used in CUPiD
TCGA-77-8009-01	TCGA	LUSC	Lung Squamous Cell Carcinoma	LUSC	Used in CUPiD
TCGA-77-8128-01	TCGA	LUSC	Lung Squamous Cell Carcinoma	LUSC	Used in CUPiD
TCGA-77-8130-01	TCGA	LUSC	Lung Squamous Cell Carcinoma	LUSC	Used in CUPiD
TCGA-77-8131-01	TCGA	LUSC	Lung Squamous Cell Carcinoma	LUSC	Used in CUPiD
TCGA-77-8133-01	TCGA	LUSC	Lung Squamous Cell Carcinoma	LUSC	Used in CUPiD
TCGA-77-8136-01	TCGA	LUSC	Lung Squamous Cell Carcinoma	LUSC	Used in CUPiD
TCGA-77-8138-01	TCGA	LUSC	Lung Squamous Cell Carcinoma	LUSC	Used in CUPiD
TCGA-77-8139-01	TCGA	LUSC	Lung Squamous Cell Carcinoma	LUSC	Used in CUPiD
TCGA-77-8140-01	TCGA	LUSC	Lung Squamous Cell Carcinoma	LUSC	Used in CUPiD
TCGA-77-8143-01	TCGA	LUSC	Lung Squamous Cell Carcinoma	LUSC	Used in CUPiD
TCGA-77-8144-01	TCGA	LUSC	Lung Squamous Cell Carcinoma	LUSC	Used in CUPiD
TCGA-77-8145-01	TCGA	LUSC	Lung Squamous Cell Carcinoma	LUSC	Used in CUPiD
TCGA-77-8146-01	TCGA	LUSC	Lung Squamous Cell Carcinoma	LUSC	Used in CUPiD
TCGA-77-8148-01	TCGA	LUSC	Lung Squamous Cell Carcinoma	LUSC	Used in CUPiD
TCGA-77-8150-01	TCGA	LUSC	Lung Squamous Cell Carcinoma	LUSC	Used in CUPiD
TCGA-77-8153-01	TCGA	LUSC	Lung Squamous Cell Carcinoma	LUSC	Used in CUPiD
TCGA-77-8154-01	TCGA	LUSC	Lung Squamous Cell Carcinoma	LUSC	Used in CUPiD
TCGA-77-8156-01	TCGA	LUSC	Lung Squamous Cell Carcinoma	LUSC	Used in CUPiD
TCGA-77-A5FZ-01	TCGA	LUSC	Lung Squamous Cell Carcinoma	LUSC	Used in CUPiD
TCGA-77-A5G1-01	TCGA	LUSC	Lung Squamous Cell Carcinoma	LUSC	Used in CUPiD
TCGA-77-A5G3-01	TCGA	LUSC	Lung Squamous Cell Carcinoma	LUSC	Used in CUPiD
TCGA-77-A5G6-01	TCGA	LUSC	Lung Squamous Cell Carcinoma	LUSC	Used in CUPiD
TCGA-77-A5G7-01	TCGA	LUSC	Lung Squamous Cell Carcinoma	LUSC	Used in CUPiD
TCGA-77-A5G8-01	TCGA	LUSC	Lung Squamous Cell Carcinoma	LUSC	Used in CUPiD
TCGA-77-A5GB-01	TCGA	LUSC	Lung Squamous Cell Carcinoma	LUSC	Used in CUPiD
TCGA-77-A5GF-01	TCGA	LUSC	Lung Squamous Cell Carcinoma	LUSC	Used in CUPiD
TCGA-77-A5GH-01	TCGA	LUSC	Lung Squamous Cell Carcinoma	LUSC	Used in CUPiD
TCGA-78-7143-01	TCGA	LUAD	Lung Adenocarcinoma	LUAD	Used in CUPiD
TCGA-78-7145-01	TCGA	LUAD	Lung Adenocarcinoma	LUAD	Used in CUPiD
TCGA-78-7146-01	TCGA	LUAD	Lung Adenocarcinoma	LUAD	Used in CUPiD
TCGA-78-7147-01	TCGA	LUAD	Lung Adenocarcinoma	LUAD	Used in CUPiD
TCGA-78-7148-01	TCGA	LUAD	Lung Adenocarcinoma	LUAD	Used in CUPiD
TCGA-78-7149-01	TCGA	LUAD	Lung Adenocarcinoma	LUAD	Used in CUPiD
TCGA-78-7150-01	TCGA	LUAD	Lung Adenocarcinoma	LUAD	Used in CUPiD
TCGA-78-7152-01	TCGA	LUAD	Lung Adenocarcinoma	LUAD	Used in CUPiD
TCGA-78-7153-01	TCGA	LUAD	Lung Adenocarcinoma	LUAD	Used in CUPiD
TCGA-78-7154-01	TCGA	LUAD	Lung Adenocarcinoma	LUAD	Used in CUPiD
TCGA-78-7155-01	TCGA	LUAD	Lung Adenocarcinoma	LUAD	Used in CUPiD
TCGA-78-7156-01	TCGA	LUAD	Lung Adenocarcinoma	LUAD	Used in CUPiD
TCGA-78-7158-01	TCGA	LUAD	Lung Adenocarcinoma	LUAD	Used in CUPiD
TCGA-78-7159-01	TCGA	LUAD	Lung Adenocarcinoma	LUAD	Used in CUPiD
TCGA-78-7160-01	TCGA	LUAD	Lung Adenocarcinoma	LUAD	Used in CUPiD
TCGA-78-7161-01	TCGA	LUAD	Lung Adenocarcinoma	LUAD	Used in CUPiD
TCGA-78-7162-01	TCGA	LUAD	Lung Adenocarcinoma	LUAD	Used in CUPiD
TCGA-78-7163-01	TCGA	LUAD	Lung Adenocarcinoma	LUAD	Used in CUPiD
TCGA-78-7166-01	TCGA	LUAD	Lung Adenocarcinoma	LUAD	Used in CUPiD
TCGA-78-7167-01	TCGA	LUAD	Lung Adenocarcinoma	LUAD	Used in CUPiD
TCGA-78-7220-01	TCGA	LUAD	Lung Adenocarcinoma	LUAD	Used in CUPiD
TCGA-78-7535-01	TCGA	LUAD	Lung Adenocarcinoma	LUAD	Used in CUPiD
TCGA-78-7536-01	TCGA	LUAD	Lung Adenocarcinoma	LUAD	Used in CUPiD
TCGA-78-7537-01	TCGA	LUAD	Lung Adenocarcinoma	LUAD	Used in CUPiD
TCGA-78-7539-01	TCGA	LUAD	Lung Adenocarcinoma	LUAD	Used in CUPiD
TCGA-78-7540-01	TCGA	LUAD	Lung Adenocarcinoma	LUAD	Used in CUPiD
TCGA-78-7542-01	TCGA	LUAD	Lung Adenocarcinoma	LUAD	Used in CUPiD
TCGA-78-7633-01	TCGA	LUAD	Lung Adenocarcinoma	LUAD	Used in CUPiD
TCGA-78-8640-01	TCGA	LUAD	Lung Adenocarcinoma	LUAD	Used in CUPiD
TCGA-78-8648-01	TCGA	LUAD	Lung Adenocarcinoma	LUAD	Used in CUPiD
TCGA-78-8655-01	TCGA	LUAD	Lung Adenocarcinoma	LUAD	Used in CUPiD
TCGA-78-8660-01	TCGA	LUAD	Lung Adenocarcinoma	LUAD	Used in CUPiD
TCGA-78-8662-01	TCGA	LUAD	Lung Adenocarcinoma	LUAD	Used in CUPiD
TCGA-79-5596-01	TCGA	LUSC	Lung Squamous Cell Carcinoma	LUSC	Used in CUPiD
TCGA-80-5607-01	TCGA	LUAD	Lung Adenocarcinoma	LUAD	Used in CUPiD
TCGA-80-5608-01	TCGA	LUAD	Lung Adenocarcinoma	LUAD	Used in CUPiD
TCGA-80-5611-01	TCGA	LUAD	Lung Adenocarcinoma	LUAD	Used in CUPiD
TCGA-81-5910-01	TCGA	GBM	Untreated primary (de novo) GBM	GBM	Used in CUPiD
TCGA-81-5911-01	TCGA	GBM	Untreated primary (de novo) GBM	GBM	Used in CUPiD
TCGA-83-5908-01	TCGA	LUAD	Lung Adenocarcinoma	LUAD	Used in CUPiD
TCGA-85-6175-01	TCGA	LUSC	Lung Squamous Cell Carcinoma	LUSC	Used in CUPiD
TCGA-85-6560-01	TCGA	LUSC	Lung Squamous Cell Carcinoma	LUSC	Used in CUPiD
TCGA-85-6561-01	TCGA	LUSC	Lung Squamous Cell Carcinoma	LUSC	Used in CUPiD
TCGA-85-6798-01	TCGA	LUSC	Lung Squamous Cell Carcinoma	LUSC	Used in CUPiD
TCGA-85-7696-01	TCGA	LUSC	Lung Squamous Cell Carcinoma	LUSC	Used in CUPiD
TCGA-85-7697-01	TCGA	LUSC	Lung Squamous Cell Carcinoma	LUSC	Used in CUPiD
TCGA-85-7698-01	TCGA	LUSC	Lung Squamous Cell Carcinoma	LUSC	Used in CUPiD
TCGA-85-7699-01	TCGA	LUSC	Lung Squamous Cell Carcinoma	LUSC	Used in CUPiD
TCGA-85-7710-01	TCGA	LUSC	Lung Squamous Cell Carcinoma	LUSC	Used in CUPiD
TCGA-85-7843-01	TCGA	LUSC	Lung Squamous Cell Carcinoma	LUSC	Used in CUPiD
TCGA-85-7844-01	TCGA	LUSC	Lung Squamous Cell Carcinoma	LUSC	Used in CUPiD
TCGA-85-7950-01	TCGA	LUSC	Lung Squamous Cell Carcinoma	LUSC	Used in CUPiD
TCGA-85-8048-01	TCGA	LUSC	Lung Squamous Cell Carcinoma	LUSC	Used in CUPiD
TCGA-85-8049-01	TCGA	LUSC	Lung Squamous Cell Carcinoma	LUSC	Used in CUPiD
TCGA-85-8052-01	TCGA	LUSC	Lung Squamous Cell Carcinoma	LUSC	Used in CUPiD
TCGA-85-8070-01	TCGA	LUSC	Lung Squamous Cell Carcinoma	LUSC	Used in CUPiD
TCGA-85-8071-01	TCGA	LUSC	Lung Squamous Cell Carcinoma	LUSC	Used in CUPiD
TCGA-85-8072-01	TCGA	LUSC	Lung Squamous Cell Carcinoma	LUSC	Used in CUPiD
TCGA-85-8276-01	TCGA	LUSC	Lung Squamous Cell Carcinoma	LUSC	Used in CUPiD
TCGA-85-8277-01	TCGA	LUSC	Lung Squamous Cell Carcinoma	LUSC	Used in CUPiD
TCGA-85-8287-01	TCGA	LUSC	Lung Squamous Cell Carcinoma	LUSC	Used in CUPiD
TCGA-85-8288-01	TCGA	LUSC	Lung Squamous Cell Carcinoma	LUSC	Used in CUPiD
TCGA-85-8350-01	TCGA	LUSC	Lung Squamous Cell Carcinoma	LUSC	Used in CUPiD
TCGA-85-8351-01	TCGA	LUSC	Lung Squamous Cell Carcinoma	LUSC	Used in CUPiD
TCGA-85-8352-01	TCGA	LUSC	Lung Squamous Cell Carcinoma	LUSC	Used in CUPiD
TCGA-85-8353-01	TCGA	LUSC	Lung Squamous Cell Carcinoma	LUSC	Used in CUPiD
TCGA-85-8354-01	TCGA	LUSC	Lung Squamous Cell Carcinoma	LUSC	Used in CUPiD
TCGA-85-8355-01	TCGA	LUSC	Lung Squamous Cell Carcinoma	LUSC	Used in CUPiD
TCGA-85-8479-01	TCGA	LUSC	Lung Squamous Cell Carcinoma	LUSC	Used in CUPiD
TCGA-85-8481-01	TCGA	LUSC	Lung Squamous Cell Carcinoma	LUSC	Used in CUPiD
TCGA-85-8580-01	TCGA	LUSC	Lung Squamous Cell Carcinoma	LUSC	Used in CUPiD
TCGA-85-8582-01	TCGA	LUSC	Lung Squamous Cell Carcinoma	LUSC	Used in CUPiD
TCGA-85-8584-01	TCGA	LUSC	Lung Squamous Cell Carcinoma	LUSC	Used in CUPiD
TCGA-85-8664-01	TCGA	LUSC	Lung Squamous Cell Carcinoma	LUSC	Used in CUPiD
TCGA-85-8666-01	TCGA	LUSC	Lung Squamous Cell Carcinoma	LUSC	Used in CUPiD
TCGA-85-A4CL-01	TCGA	LUSC	Lung Squamous Cell Carcinoma	LUSC	Used in CUPiD
TCGA-85-A4CN-01	TCGA	LUSC	Lung Squamous Cell Carcinoma	LUSC	Used in CUPiD
TCGA-85-A4JB-01	TCGA	LUSC	Lung Squamous Cell Carcinoma	LUSC	Used in CUPiD
TCGA-85-A4JC-01	TCGA	LUSC	Lung Squamous Cell Carcinoma	LUSC	Used in CUPiD
TCGA-85-A4PA-01	TCGA	LUSC	Lung Squamous Cell Carcinoma	LUSC	Used in CUPiD
TCGA-85-A4QQ-01	TCGA	LUSC	Lung Squamous Cell Carcinoma	LUSC	Used in CUPiD
TCGA-85-A4QR-01	TCGA	LUSC	Lung Squamous Cell Carcinoma	LUSC	Used in CUPiD
TCGA-85-A50M-01	TCGA	LUSC	Lung Squamous Cell Carcinoma	LUSC	Used in CUPiD
TCGA-85-A50Z-01	TCGA	LUSC	Lung Squamous Cell Carcinoma	LUSC	Used in CUPiD
TCGA-85-A510-01	TCGA	LUSC	Lung Squamous Cell Carcinoma	LUSC	Used in CUPiD
TCGA-85-A511-01	TCGA	LUSC	Lung Squamous Cell Carcinoma	LUSC	Used in CUPiD
TCGA-85-A512-01	TCGA	LUSC	Lung Squamous Cell Carcinoma	LUSC	Used in CUPiD
TCGA-85-A513-01	TCGA	LUSC	Lung Squamous Cell Carcinoma	LUSC	Used in CUPiD
TCGA-85-A53L-01	TCGA	LUSC	Lung Squamous Cell Carcinoma	LUSC	Used in CUPiD
TCGA-85-A5B5-01	TCGA	LUSC	Lung Squamous Cell Carcinoma	LUSC	Used in CUPiD
TCGA-86-6562-01	TCGA	LUAD	Lung Adenocarcinoma	LUAD	Used in CUPiD
TCGA-86-6851-01	TCGA	LUAD	Lung Adenocarcinoma	LUAD	Used in CUPiD
TCGA-86-7701-01	TCGA	LUAD	Lung Adenocarcinoma	LUAD	Used in CUPiD
TCGA-86-7711-01	TCGA	LUAD	Lung Adenocarcinoma	LUAD	Used in CUPiD
TCGA-86-7713-01	TCGA	LUAD	Lung Adenocarcinoma	LUAD	Used in CUPiD
TCGA-86-7714-01	TCGA	LUAD	Lung Adenocarcinoma	LUAD	Used in CUPiD
TCGA-86-7953-01	TCGA	LUAD	Lung Adenocarcinoma	LUAD	Used in CUPiD
TCGA-86-7954-01	TCGA	LUAD	Lung Adenocarcinoma	LUAD	Used in CUPiD
TCGA-86-7955-01	TCGA	LUAD	Lung Adenocarcinoma	LUAD	Used in CUPiD
TCGA-86-8054-01	TCGA	LUAD	Lung Adenocarcinoma	LUAD	Used in CUPiD
TCGA-86-8055-01	TCGA	LUAD	Lung Adenocarcinoma	LUAD	Used in CUPiD
TCGA-86-8056-01	TCGA	LUAD	Lung Adenocarcinoma	LUAD	Used in CUPiD
TCGA-86-8073-01	TCGA	LUAD	Lung Adenocarcinoma	LUAD	Used in CUPiD
TCGA-86-8074-01	TCGA	LUAD	Lung Adenocarcinoma	LUAD	Used in CUPiD
TCGA-86-8075-01	TCGA	LUAD	Lung Adenocarcinoma	LUAD	Used in CUPiD
TCGA-86-8076-01	TCGA	LUAD	Lung Adenocarcinoma	LUAD	Used in CUPiD
TCGA-86-8278-01	TCGA	LUAD	Lung Adenocarcinoma	LUAD	Used in CUPiD
TCGA-86-8279-01	TCGA	LUAD	Lung Adenocarcinoma	LUAD	Used in CUPiD
TCGA-86-8280-01	TCGA	LUAD	Lung Adenocarcinoma	LUAD	Used in CUPiD
TCGA-86-8281-01	TCGA	LUAD	Lung Adenocarcinoma	LUAD	Used in CUPiD
TCGA-86-8358-01	TCGA	LUAD	Lung Adenocarcinoma	LUAD	Used in CUPiD
TCGA-86-8359-01	TCGA	LUAD	Lung Adenocarcinoma	LUAD	Used in CUPiD
TCGA-86-8585-01	TCGA	LUAD	Lung Adenocarcinoma	LUAD	Used in CUPiD
TCGA-86-8668-01	TCGA	LUAD	Lung Adenocarcinoma	LUAD	Used in CUPiD
TCGA-86-8669-01	TCGA	LUAD	Lung Adenocarcinoma	LUAD	Used in CUPiD
TCGA-86-8671-01	TCGA	LUAD	Lung Adenocarcinoma	LUAD	Used in CUPiD
TCGA-86-8672-01	TCGA	LUAD	Lung Adenocarcinoma	LUAD	Used in CUPiD
TCGA-86-8673-01	TCGA	LUAD	Lung Adenocarcinoma	LUAD	Used in CUPiD
TCGA-86-8674-01	TCGA	LUAD	Lung Adenocarcinoma	LUAD	Used in CUPiD
TCGA-86-A456-01	TCGA	LUAD	Lung Adenocarcinoma	LUAD	Used in CUPiD
TCGA-86-A4D0-01	TCGA	LUAD	Lung Adenocarcinoma	LUAD	Used in CUPiD
TCGA-86-A4JF-01	TCGA	LUAD	Lung Adenocarcinoma	LUAD	Used in CUPiD
TCGA-86-A4P7-01	TCGA	LUAD	Lung Adenocarcinoma	LUAD	Used in CUPiD
TCGA-86-A4P8-01	TCGA	LUAD	Lung Adenocarcinoma	LUAD	Used in CUPiD
TCGA-87-5896-01	TCGA	GBM	Untreated primary (de novo) GBM	GBM	Used in CUPiD
TCGA-90-6837-01	TCGA	LUSC	Lung Squamous Cell Carcinoma	LUSC	Used in CUPiD
TCGA-90-7766-01	TCGA	LUSC	Lung Squamous Cell Carcinoma	LUSC	Used in CUPiD
TCGA-90-7767-01	TCGA	LUSC	Lung Squamous Cell Carcinoma	LUSC	Used in CUPiD
TCGA-90-7769-01	TCGA	LUSC	Lung Squamous Cell Carcinoma	LUSC	Used in CUPiD
TCGA-90-7964-01	TCGA	LUSC	Lung Squamous Cell Carcinoma	LUSC	Used in CUPiD
TCGA-90-A4ED-01	TCGA	LUSC	Lung Squamous Cell Carcinoma	LUSC	Used in CUPiD
TCGA-90-A4EE-01	TCGA	LUSC	Lung Squamous Cell Carcinoma	LUSC	Used in CUPiD
TCGA-90-A59Q-01	TCGA	LUSC	Lung Squamous Cell Carcinoma	LUSC	Used in CUPiD
TCGA-91-6828-01	TCGA	LUAD	Lung Adenocarcinoma	LUAD	Used in CUPiD
TCGA-91-6829-01	TCGA	LUAD	Lung Adenocarcinoma	LUAD	Used in CUPiD
TCGA-91-6830-01	TCGA	LUAD	Lung Adenocarcinoma	LUAD	Used in CUPiD
TCGA-91-6831-01	TCGA	LUAD	Lung Adenocarcinoma	LUAD	Used in CUPiD
TCGA-91-6835-01	TCGA	LUAD	Lung Adenocarcinoma	LUAD	Used in CUPiD
TCGA-91-6836-01	TCGA	LUAD	Lung Adenocarcinoma	LUAD	Used in CUPiD
TCGA-91-6840-01	TCGA	LUAD	Lung Adenocarcinoma	LUAD	Used in CUPiD
TCGA-91-6847-01	TCGA	LUAD	Lung Adenocarcinoma	LUAD	Used in CUPiD
TCGA-91-6848-01	TCGA	LUAD	Lung Adenocarcinoma	LUAD	Used in CUPiD
TCGA-91-6849-01	TCGA	LUAD	Lung Adenocarcinoma	LUAD	Used in CUPiD
TCGA-91-7771-01	TCGA	LUAD	Lung Adenocarcinoma	LUAD	Used in CUPiD
TCGA-91-8496-01	TCGA	LUAD	Lung Adenocarcinoma	LUAD	Used in CUPiD
TCGA-91-8497-01	TCGA	LUAD	Lung Adenocarcinoma	LUAD	Used in CUPiD
TCGA-91-8499-01	TCGA	LUAD	Lung Adenocarcinoma	LUAD	Used in CUPiD
TCGA-91-A4BC-01	TCGA	LUAD	Lung Adenocarcinoma	LUAD	Used in CUPiD
TCGA-91-A4BD-01	TCGA	LUAD	Lung Adenocarcinoma	LUAD	Used in CUPiD
TCGA-92-7340-01	TCGA	LUSC	Lung Squamous Cell Carcinoma	LUSC	Used in CUPiD
TCGA-92-7341-01	TCGA	LUSC	Lung Squamous Cell Carcinoma	LUSC	Used in CUPiD
TCGA-92-8063-01	TCGA	LUSC	Lung Squamous Cell Carcinoma	LUSC	Used in CUPiD
TCGA-92-8064-01	TCGA	LUSC	Lung Squamous Cell Carcinoma	LUSC	Used in CUPiD
TCGA-92-8065-01	TCGA	LUSC	Lung Squamous Cell Carcinoma	LUSC	Used in CUPiD
TCGA-93-7347-01	TCGA	LUAD	Lung Adenocarcinoma	LUAD	Used in CUPiD
TCGA-93-7348-01	TCGA	LUAD	Lung Adenocarcinoma	LUAD	Used in CUPiD
TCGA-93-8067-01	TCGA	LUAD	Lung Adenocarcinoma	LUAD	Used in CUPiD
TCGA-93-A4JN-01	TCGA	LUAD	Lung Adenocarcinoma	LUAD	Used in CUPiD
TCGA-93-A4JO-01	TCGA	LUAD	Lung Adenocarcinoma	LUAD	Used in CUPiD
TCGA-93-A4JP-01	TCGA	LUAD	Lung Adenocarcinoma	LUAD	Used in CUPiD
TCGA-93-A4JQ-01	TCGA	LUAD	Lung Adenocarcinoma	LUAD	Used in CUPiD
TCGA-94-7033-01	TCGA	LUSC	Lung Squamous Cell Carcinoma	LUSC	Used in CUPiD
TCGA-94-7557-01	TCGA	LUSC	Lung Squamous Cell Carcinoma	LUSC	Used in CUPiD
TCGA-94-7943-01	TCGA	LUSC	Lung Squamous Cell Carcinoma	LUSC	Used in CUPiD
TCGA-94-8035-01	TCGA	LUSC	Lung Squamous Cell Carcinoma	LUSC	Used in CUPiD
TCGA-94-8490-01	TCGA	LUSC	Lung Squamous Cell Carcinoma	LUSC	Used in CUPiD
TCGA-94-8491-01	TCGA	LUSC	Lung Squamous Cell Carcinoma	LUSC	Used in CUPiD
TCGA-94-A4VJ-01	TCGA	LUSC	Lung Squamous Cell Carcinoma	LUSC	Used in CUPiD
TCGA-94-A5I4-01	TCGA	LUSC	Lung Squamous Cell Carcinoma	LUSC	Used in CUPiD
TCGA-94-A5I6-01	TCGA	LUSC	Lung Squamous Cell Carcinoma	LUSC	Used in CUPiD
TCGA-95-7039-01	TCGA	LUAD	Lung Adenocarcinoma	LUAD	Used in CUPiD
TCGA-95-7043-01	TCGA	LUAD	Lung Adenocarcinoma	LUAD	Used in CUPiD
TCGA-95-7562-01	TCGA	LUAD	Lung Adenocarcinoma	LUAD	Used in CUPiD
TCGA-95-7567-01	TCGA	LUAD	Lung Adenocarcinoma	LUAD	Used in CUPiD
TCGA-95-7944-01	TCGA	LUAD	Lung Adenocarcinoma	LUAD	Used in CUPiD
TCGA-95-7947-01	TCGA	LUAD	Lung Adenocarcinoma	LUAD	Used in CUPiD
TCGA-95-7948-01	TCGA	LUAD	Lung Adenocarcinoma	LUAD	Used in CUPiD
TCGA-95-8039-01	TCGA	LUAD	Lung Adenocarcinoma	LUAD	Used in CUPiD
TCGA-95-8494-01	TCGA	LUAD	Lung Adenocarcinoma	LUAD	Used in CUPiD
TCGA-95-A4VK-01	TCGA	LUAD	Lung Adenocarcinoma	LUAD	Used in CUPiD
TCGA-95-A4VN-01	TCGA	LUAD	Lung Adenocarcinoma	LUAD	Used in CUPiD
TCGA-95-A4VP-01	TCGA	LUAD	Lung Adenocarcinoma	LUAD	Used in CUPiD
TCGA-96-7544-01	TCGA	LUSC	Lung Squamous Cell Carcinoma	LUSC	Used in CUPiD
TCGA-96-7545-01	TCGA	LUSC	Lung Squamous Cell Carcinoma	LUSC	Used in CUPiD
TCGA-96-8169-01	TCGA	LUSC	Lung Squamous Cell Carcinoma	LUSC	Used in CUPiD
TCGA-96-8170-01	TCGA	LUSC	Lung Squamous Cell Carcinoma	LUSC	Used in CUPiD
TCGA-96-A4JL-01	TCGA	LUSC	Lung Squamous Cell Carcinoma	LUSC	Used in CUPiD
TCGA-97-7546-01	TCGA	LUAD	Lung Adenocarcinoma	LUAD	Used in CUPiD
TCGA-97-7547-01	TCGA	LUAD	Lung Adenocarcinoma	LUAD	Used in CUPiD
TCGA-97-7552-01	TCGA	LUAD	Lung Adenocarcinoma	LUAD	Used in CUPiD
TCGA-97-7553-01	TCGA	LUAD	Lung Adenocarcinoma	LUAD	Used in CUPiD
TCGA-97-7554-01	TCGA	LUAD	Lung Adenocarcinoma	LUAD	Used in CUPiD
TCGA-97-7937-01	TCGA	LUAD	Lung Adenocarcinoma	LUAD	Used in CUPiD
TCGA-97-7938-01	TCGA	LUAD	Lung Adenocarcinoma	LUAD	Used in CUPiD
TCGA-97-7941-01	TCGA	LUAD	Lung Adenocarcinoma	LUAD	Used in CUPiD
TCGA-97-8171-01	TCGA	LUAD	Lung Adenocarcinoma	LUAD	Used in CUPiD
TCGA-97-8172-01	TCGA	LUAD	Lung Adenocarcinoma	LUAD	Used in CUPiD
TCGA-97-8174-01	TCGA	LUAD	Lung Adenocarcinoma	LUAD	Used in CUPiD
TCGA-97-8175-01	TCGA	LUAD	Lung Adenocarcinoma	LUAD	Used in CUPiD
TCGA-97-8176-01	TCGA	LUAD	Lung Adenocarcinoma	LUAD	Used in CUPiD
TCGA-97-8177-01	TCGA	LUAD	Lung Adenocarcinoma	LUAD	Used in CUPiD
TCGA-97-8179-01	TCGA	LUAD	Lung Adenocarcinoma	LUAD	Used in CUPiD
TCGA-97-8547-01	TCGA	LUAD	Lung Adenocarcinoma	LUAD	Used in CUPiD
TCGA-97-8552-01	TCGA	LUAD	Lung Adenocarcinoma	LUAD	Used in CUPiD
TCGA-97-A4LX-01	TCGA	LUAD	Lung Adenocarcinoma	LUAD	Used in CUPiD
TCGA-97-A4M0-01	TCGA	LUAD	Lung Adenocarcinoma	LUAD	Used in CUPiD
TCGA-97-A4M1-01	TCGA	LUAD	Lung Adenocarcinoma	LUAD	Used in CUPiD
TCGA-97-A4M2-01	TCGA	LUAD	Lung Adenocarcinoma	LUAD	Used in CUPiD
TCGA-97-A4M3-01	TCGA	LUAD	Lung Adenocarcinoma	LUAD	Used in CUPiD
TCGA-97-A4M5-01	TCGA	LUAD	Lung Adenocarcinoma	LUAD	Used in CUPiD
TCGA-97-A4M6-01	TCGA	LUAD	Lung Adenocarcinoma	LUAD	Used in CUPiD
TCGA-97-A4M7-01	TCGA	LUAD	Lung Adenocarcinoma	LUAD	Used in CUPiD
TCGA-98-7454-01	TCGA	LUSC	Lung Squamous Cell Carcinoma	LUSC	Used in CUPiD
TCGA-98-8020-01	TCGA	LUSC	Lung Squamous Cell Carcinoma	LUSC	Used in CUPiD
TCGA-98-8021-01	TCGA	LUSC	Lung Squamous Cell Carcinoma	LUSC	Used in CUPiD
TCGA-98-8022-01	TCGA	LUSC	Lung Squamous Cell Carcinoma	LUSC	Used in CUPiD
TCGA-98-8023-01	TCGA	LUSC	Lung Squamous Cell Carcinoma	LUSC	Used in CUPiD
TCGA-98-A538-01	TCGA	LUSC	Lung Squamous Cell Carcinoma	LUSC	Used in CUPiD
TCGA-98-A539-01	TCGA	LUSC	Lung Squamous Cell Carcinoma	LUSC	Used in CUPiD
TCGA-98-A53A-01	TCGA	LUSC	Lung Squamous Cell Carcinoma	LUSC	Used in CUPiD
TCGA-98-A53B-01	TCGA	LUSC	Lung Squamous Cell Carcinoma	LUSC	Used in CUPiD
TCGA-98-A53C-01	TCGA	LUSC	Lung Squamous Cell Carcinoma	LUSC	Used in CUPiD
TCGA-98-A53D-01	TCGA	LUSC	Lung Squamous Cell Carcinoma	LUSC	Used in CUPiD
TCGA-98-A53H-01	TCGA	LUSC	Lung Squamous Cell Carcinoma	LUSC	Used in CUPiD
TCGA-98-A53I-01	TCGA	LUSC	Lung Squamous Cell Carcinoma	LUSC	Used in CUPiD
TCGA-98-A53J-01	TCGA	LUSC	Lung Squamous Cell Carcinoma	LUSC	Used in CUPiD
TCGA-99-7458-01	TCGA	LUAD	Lung Adenocarcinoma	LUAD	Used in CUPiD
TCGA-99-8025-01	TCGA	LUAD	Lung Adenocarcinoma	LUAD	Used in CUPiD
TCGA-99-8028-01	TCGA	LUAD	Lung Adenocarcinoma	LUAD	Used in CUPiD
TCGA-99-8032-01	TCGA	LUAD	Lung Adenocarcinoma	LUAD	Used in CUPiD
TCGA-99-8033-01	TCGA	LUAD	Lung Adenocarcinoma	LUAD	Used in CUPiD
TCGA-99-AA5R-01	TCGA	LUAD	Lung Adenocarcinoma	LUAD	Used in CUPiD
TCGA-A1-A0SB-01	TCGA	BRCA	Other, specify	BRCA	Used in CUPiD
TCGA-A1-A0SE-01	TCGA	BRCA	Mixed Histology (please specify)	BRCA	Used in CUPiD
TCGA-A1-A0SF-01	TCGA	BRCA	Infiltrating Ductal Carcinoma	BRCA	Used in CUPiD
TCGA-A1-A0SG-01	TCGA	BRCA	Other, specify	BRCA	Used in CUPiD
TCGA-A1-A0SH-01	TCGA	BRCA	Infiltrating Ductal Carcinoma	BRCA	Used in CUPiD
TCGA-A1-A0SI-01	TCGA	BRCA	Infiltrating Ductal Carcinoma	BRCA	Used in CUPiD
TCGA-A1-A0SJ-01	TCGA	BRCA	Infiltrating Ductal Carcinoma	BRCA	Used in CUPiD
TCGA-A1-A0SK-01	TCGA	BRCA	Other, specify	BRCA	Used in CUPiD
TCGA-A1-A0SM-01	TCGA	BRCA	Infiltrating Ductal Carcinoma	BRCA	Used in CUPiD
TCGA-A1-A0SN-01	TCGA	BRCA	Infiltrating Ductal Carcinoma	BRCA	Used in CUPiD
TCGA-A1-A0SO-01	TCGA	BRCA	Infiltrating Ductal Carcinoma	BRCA	Used in CUPiD
TCGA-A1-A0SP-01	TCGA	BRCA	Infiltrating Ductal Carcinoma	BRCA	Used in CUPiD
TCGA-A1-A0SQ-01	TCGA	BRCA	Infiltrating Ductal Carcinoma	BRCA	Used in CUPiD
TCGA-A2-A04R-01	TCGA	BRCA	Infiltrating Ductal Carcinoma	BRCA	Used in CUPiD
TCGA-A2-A0CK-01	TCGA	BRCA	Infiltrating Lobular Carcinoma	BRCA	Used in CUPiD
TCGA-A2-A0CO-01	TCGA	BRCA	Infiltrating Lobular Carcinoma	BRCA	Used in CUPiD
TCGA-A2-A0CR-01	TCGA	BRCA	Infiltrating Lobular Carcinoma	BRCA	Used in CUPiD
TCGA-A2-A0CT-01	TCGA	BRCA	Infiltrating Ductal Carcinoma	BRCA	Used in CUPiD
TCGA-A2-A0EN-01	TCGA	BRCA	Infiltrating Lobular Carcinoma	BRCA	Used in CUPiD
TCGA-A2-A0EP-01	TCGA	BRCA	Infiltrating Lobular Carcinoma	BRCA	Used in CUPiD
TCGA-A2-A0EU-01	TCGA	BRCA	Infiltrating Ductal Carcinoma	BRCA	Used in CUPiD
TCGA-A2-A0ST-01	TCGA	BRCA	Infiltrating Ductal Carcinoma	BRCA	Used in CUPiD
TCGA-A2-A0SU-01	TCGA	BRCA	Infiltrating Ductal Carcinoma	BRCA	Used in CUPiD
TCGA-A2-A0SV-01	TCGA	BRCA	Infiltrating Ductal Carcinoma	BRCA	Used in CUPiD
TCGA-A2-A0SW-01	TCGA	BRCA	Infiltrating Ductal Carcinoma	BRCA	Used in CUPiD
TCGA-A2-A0SX-01	TCGA	BRCA	Infiltrating Ductal Carcinoma	BRCA	Used in CUPiD
TCGA-A2-A0SY-01	TCGA	BRCA	Infiltrating Lobular Carcinoma	BRCA	Used in CUPiD
TCGA-A2-A0T0-01	TCGA	BRCA	Infiltrating Ductal Carcinoma	BRCA	Used in CUPiD
TCGA-A2-A0T1-01	TCGA	BRCA	Infiltrating Ductal Carcinoma	BRCA	Used in CUPiD
TCGA-A2-A0T2-01	TCGA	BRCA	Infiltrating Ductal Carcinoma	BRCA	Used in CUPiD
TCGA-A2-A0T4-01	TCGA	BRCA	Infiltrating Lobular Carcinoma	BRCA	Used in CUPiD
TCGA-A2-A0T5-01	TCGA	BRCA	Infiltrating Ductal Carcinoma	BRCA	Used in CUPiD
TCGA-A2-A0T6-01	TCGA	BRCA	Infiltrating Lobular Carcinoma	BRCA	Used in CUPiD
TCGA-A2-A0T7-01	TCGA	BRCA	Infiltrating Ductal Carcinoma	BRCA	Used in CUPiD
TCGA-A2-A0YC-01	TCGA	BRCA	Infiltrating Ductal Carcinoma	BRCA	Used in CUPiD
TCGA-A2-A0YD-01	TCGA	BRCA	Infiltrating Lobular Carcinoma	BRCA	Used in CUPiD
TCGA-A2-A0YE-01	TCGA	BRCA	Infiltrating Ductal Carcinoma	BRCA	Used in CUPiD
TCGA-A2-A0YF-01	TCGA	BRCA	Infiltrating Ductal Carcinoma	BRCA	Used in CUPiD
TCGA-A2-A0YG-01	TCGA	BRCA	Infiltrating Ductal Carcinoma	BRCA	Used in CUPiD
TCGA-A2-A0YH-01	TCGA	BRCA	Infiltrating Ductal Carcinoma	BRCA	Used in CUPiD
TCGA-A2-A0YI-01	TCGA	BRCA	Infiltrating Ductal Carcinoma	BRCA	Used in CUPiD
TCGA-A2-A0YJ-01	TCGA	BRCA	Infiltrating Ductal Carcinoma	BRCA	Used in CUPiD
TCGA-A2-A0YK-01	TCGA	BRCA	Infiltrating Lobular Carcinoma	BRCA	Used in CUPiD
TCGA-A2-A0YL-01	TCGA	BRCA	Infiltrating Lobular Carcinoma	BRCA	Used in CUPiD
TCGA-A2-A0YM-01	TCGA	BRCA	Infiltrating Ductal Carcinoma	BRCA	Used in CUPiD
TCGA-A2-A0YT-01	TCGA	BRCA	Infiltrating Ductal Carcinoma	BRCA	Used in CUPiD
TCGA-A2-A1FV-01	TCGA	BRCA	Infiltrating Lobular Carcinoma	BRCA	Used in CUPiD
TCGA-A2-A1FW-01	TCGA	BRCA	Infiltrating Ductal Carcinoma	BRCA	Used in CUPiD
TCGA-A2-A1FX-01	TCGA	BRCA	Infiltrating Ductal Carcinoma	BRCA	Used in CUPiD
TCGA-A2-A1FZ-01	TCGA	BRCA	Infiltrating Ductal Carcinoma	BRCA	Used in CUPiD
TCGA-A2-A1G0-01	TCGA	BRCA	Other, specify	BRCA	Used in CUPiD
TCGA-A2-A1G1-01	TCGA	BRCA	Infiltrating Ductal Carcinoma	BRCA	Used in CUPiD
TCGA-A2-A1G4-01	TCGA	BRCA	Infiltrating Ductal Carcinoma	BRCA	Used in CUPiD
TCGA-A2-A1G6-01	TCGA	BRCA	Infiltrating Ductal Carcinoma	BRCA	Used in CUPiD
TCGA-A2-A259-01	TCGA	BRCA	Infiltrating Ductal Carcinoma	BRCA	Used in CUPiD
TCGA-A2-A25A-01	TCGA	BRCA	Infiltrating Lobular Carcinoma	BRCA	Used in CUPiD
TCGA-A2-A25B-01	TCGA	BRCA	Infiltrating Ductal Carcinoma	BRCA	Used in CUPiD
TCGA-A2-A25C-01	TCGA	BRCA	Infiltrating Ductal Carcinoma	BRCA	Used in CUPiD
TCGA-A2-A25D-01	TCGA	BRCA	Infiltrating Lobular Carcinoma	BRCA	Used in CUPiD
TCGA-A2-A25E-01	TCGA	BRCA	Infiltrating Ductal Carcinoma	BRCA	Used in CUPiD
TCGA-A2-A25F-01	TCGA	BRCA	Infiltrating Ductal Carcinoma	BRCA	Used in CUPiD
TCGA-A2-A3KC-01	TCGA	BRCA	Infiltrating Lobular Carcinoma	BRCA	Used in CUPiD
TCGA-A2-A3KD-01	TCGA	BRCA	Mucinous Carcinoma	BRCA	Used in CUPiD
TCGA-A2-A3XS-01	TCGA	BRCA	Infiltrating Ductal Carcinoma	BRCA	Used in CUPiD
TCGA-A2-A3XT-01	TCGA	BRCA	Infiltrating Ductal Carcinoma	BRCA	Used in CUPiD
TCGA-A2-A3XU-01	TCGA	BRCA	Infiltrating Ductal Carcinoma	BRCA	Used in CUPiD
TCGA-A2-A3XV-01	TCGA	BRCA	Infiltrating Ductal Carcinoma	BRCA	Used in CUPiD
TCGA-A2-A3XW-01	TCGA	BRCA	Infiltrating Ductal Carcinoma	BRCA	Used in CUPiD
TCGA-A2-A3XX-01	TCGA	BRCA	Infiltrating Ductal Carcinoma	BRCA	Used in CUPiD
TCGA-A2-A3XY-01	TCGA	BRCA	Infiltrating Ductal Carcinoma	BRCA	Used in CUPiD
TCGA-A2-A3XZ-01	TCGA	BRCA	Infiltrating Ductal Carcinoma	BRCA	Used in CUPiD
TCGA-A2-A3Y0-01	TCGA	BRCA	Infiltrating Ductal Carcinoma	BRCA	Used in CUPiD
TCGA-A2-A4RW-01	TCGA	BRCA	Infiltrating Lobular Carcinoma	BRCA	Used in CUPiD
TCGA-A2-A4RX-01	TCGA	BRCA	Metaplastic Carcinoma	BRCA	Used in CUPiD
TCGA-A2-A4RY-01	TCGA	BRCA	Infiltrating Lobular Carcinoma	BRCA	Used in CUPiD
TCGA-A2-A4S0-01	TCGA	BRCA	Mucinous Carcinoma	BRCA	Used in CUPiD
TCGA-A2-A4S1-01	TCGA	BRCA	Metaplastic Carcinoma	BRCA	Used in CUPiD
TCGA-A2-A4S2-01	TCGA	BRCA	Infiltrating Lobular Carcinoma	BRCA	Used in CUPiD
TCGA-A2-A4S3-01	TCGA	BRCA	Infiltrating Ductal Carcinoma	BRCA	Used in CUPiD
TCGA-A3-3357-01	TCGA	KIRC	Kidney Clear Cell Renal Carcinoma	KIRC	Used in CUPiD
TCGA-A3-3357-11	TCGA	KIRC	Kidney Clear Cell Renal Carcinoma	Normal Tissue	Adjacent Normal
TCGA-A3-3358-01	TCGA	KIRC	Kidney Clear Cell Renal Carcinoma	KIRC	Used in CUPiD
TCGA-A3-3367-01	TCGA	KIRC	Kidney Clear Cell Renal Carcinoma	KIRC	Used in CUPiD
TCGA-A3-3367-11	TCGA	KIRC	Kidney Clear Cell Renal Carcinoma	Normal Tissue	Adjacent Normal
TCGA-A3-3370-01	TCGA	KIRC	Kidney Clear Cell Renal Carcinoma	KIRC	Used in CUPiD
TCGA-A3-3370-11	TCGA	KIRC	Kidney Clear Cell Renal Carcinoma	Normal Tissue	Adjacent Normal
TCGA-A3-3373-01	TCGA	KIRC	Kidney Clear Cell Renal Carcinoma	KIRC	Used in CUPiD
TCGA-A3-3373-11	TCGA	KIRC	Kidney Clear Cell Renal Carcinoma	Normal Tissue	Adjacent Normal
TCGA-A3-3376-01	TCGA	KIRC	Kidney Clear Cell Renal Carcinoma	KIRC	Used in CUPiD
TCGA-A3-3376-11	TCGA	KIRC	Kidney Clear Cell Renal Carcinoma	Normal Tissue	Adjacent Normal
TCGA-A3-3385-01	TCGA	KIRC	Kidney Clear Cell Renal Carcinoma	KIRC	Used in CUPiD
TCGA-A3-3385-11	TCGA	KIRC	Kidney Clear Cell Renal Carcinoma	Normal Tissue	Adjacent Normal
TCGA-A3-3387-01	TCGA	KIRC	Kidney Clear Cell Renal Carcinoma	KIRC	Used in CUPiD
TCGA-A3-A6NI-01	TCGA	KIRC	Kidney Clear Cell Renal Carcinoma	KIRC	Used in CUPiD
TCGA-A3-A6NJ-01	TCGA	KIRC	Kidney Clear Cell Renal Carcinoma	KIRC	Used in CUPiD
TCGA-A3-A6NL-01	TCGA	KIRC	Kidney Clear Cell Renal Carcinoma	KIRC	Used in CUPiD
TCGA-A3-A6NN-01	TCGA	KIRC	Kidney Clear Cell Renal Carcinoma	KIRC	Used in CUPiD
TCGA-A3-A8CQ-01	TCGA	KIRC	Kidney Clear Cell Renal Carcinoma	KIRC	Used in CUPiD
TCGA-A3-A8OU-01	TCGA	KIRC	Kidney Clear Cell Renal Carcinoma	KIRC	Used in CUPiD
TCGA-A3-A8OV-01	TCGA	KIRC	Kidney Clear Cell Renal Carcinoma	KIRC	Used in CUPiD
TCGA-A3-A8OW-01	TCGA	KIRC	Kidney Clear Cell Renal Carcinoma	KIRC	Used in CUPiD
TCGA-A3-A8OX-01	TCGA	KIRC	Kidney Clear Cell Renal Carcinoma	KIRC	Used in CUPiD
TCGA-A4-7286-01	TCGA	KIRP	Kidney Papillary Renal Cell Carcinoma	KIRP	Used in CUPiD
TCGA-A4-7287-01	TCGA	KIRP	Kidney Papillary Renal Cell Carcinoma	KIRP	Used in CUPiD
TCGA-A4-7288-01	TCGA	KIRP	Kidney Papillary Renal Cell Carcinoma	KIRP	Used in CUPiD
TCGA-A4-7288-11	TCGA	KIRP	Kidney Papillary Renal Cell Carcinoma	Normal Tissue	Adjacent Normal
TCGA-A4-7583-01	TCGA	KIRP	Kidney Papillary Renal Cell Carcinoma	KIRP	Used in CUPiD
TCGA-A4-7584-01	TCGA	KIRP	Kidney Papillary Renal Cell Carcinoma	KIRP	Used in CUPiD
TCGA-A4-7585-01	TCGA	KIRP	Kidney Papillary Renal Cell Carcinoma	KIRP	Used in CUPiD
TCGA-A4-7585-11	TCGA	KIRP	Kidney Papillary Renal Cell Carcinoma	Normal Tissue	Adjacent Normal
TCGA-A4-7732-01	TCGA	KIRP	Kidney Papillary Renal Cell Carcinoma	KIRP	Used in CUPiD
TCGA-A4-7732-11	TCGA	KIRP	Kidney Papillary Renal Cell Carcinoma	Normal Tissue	Adjacent Normal
TCGA-A4-7734-01	TCGA	KIRP	Kidney Papillary Renal Cell Carcinoma	KIRP	Used in CUPiD
TCGA-A4-7828-01	TCGA	KIRP	Kidney Papillary Renal Cell Carcinoma	KIRP	Used in CUPiD
TCGA-A4-7915-01	TCGA	KIRP	Kidney Papillary Renal Cell Carcinoma	KIRP	Used in CUPiD
TCGA-A4-7996-01	TCGA	KIRP	Kidney Papillary Renal Cell Carcinoma	KIRP	Used in CUPiD
TCGA-A4-7997-01	TCGA	KIRP	Kidney Papillary Renal Cell Carcinoma	KIRP	Used in CUPiD
TCGA-A4-8098-01	TCGA	KIRP	Kidney Papillary Renal Cell Carcinoma	KIRP	Used in CUPiD
TCGA-A4-8310-01	TCGA	KIRP	Kidney Papillary Renal Cell Carcinoma	KIRP	Used in CUPiD
TCGA-A4-8311-01	TCGA	KIRP	Kidney Papillary Renal Cell Carcinoma	KIRP	Used in CUPiD
TCGA-A4-8312-01	TCGA	KIRP	Kidney Papillary Renal Cell Carcinoma	KIRP	Used in CUPiD
TCGA-A4-8515-01	TCGA	KIRP	Kidney Papillary Renal Cell Carcinoma	KIRP	Used in CUPiD
TCGA-A4-8516-01	TCGA	KIRP	Kidney Papillary Renal Cell Carcinoma	KIRP	Used in CUPiD
TCGA-A4-8517-01	TCGA	KIRP	Kidney Papillary Renal Cell Carcinoma	KIRP	Used in CUPiD
TCGA-A4-8518-01	TCGA	KIRP	Kidney Papillary Renal Cell Carcinoma	KIRP	Used in CUPiD
TCGA-A4-8630-01	TCGA	KIRP	Kidney Papillary Renal Cell Carcinoma	KIRP	Used in CUPiD
TCGA-A4-A48D-01	TCGA	KIRP	Kidney Papillary Renal Cell Carcinoma	KIRP	Used in CUPiD
TCGA-A4-A4ZT-01	TCGA	KIRP	Kidney Papillary Renal Cell Carcinoma	KIRP	Used in CUPiD
TCGA-A4-A57E-01	TCGA	KIRP	Kidney Papillary Renal Cell Carcinoma	KIRP	Used in CUPiD
TCGA-A4-A5DU-01	TCGA	KIRP	Kidney Papillary Renal Cell Carcinoma	KIRP	Used in CUPiD
TCGA-A4-A5XZ-01	TCGA	KIRP	Kidney Papillary Renal Cell Carcinoma	KIRP	Used in CUPiD
TCGA-A4-A5Y0-01	TCGA	KIRP	Kidney Papillary Renal Cell Carcinoma	KIRP	Used in CUPiD
TCGA-A4-A5Y1-01	TCGA	KIRP	Kidney Papillary Renal Cell Carcinoma	KIRP	Used in CUPiD
TCGA-A4-A6HP-01	TCGA	KIRP	Kidney Papillary Renal Cell Carcinoma	KIRP	Used in CUPiD
TCGA-A4-A772-01	TCGA	KIRP	Kidney Papillary Renal Cell Carcinoma	KIRP	Used in CUPiD
TCGA-A4-A7UZ-01	TCGA	KIRP	Kidney Papillary Renal Cell Carcinoma	KIRP	Used in CUPiD
TCGA-A5-A0G1-01	TCGA	UCEC	Serous endometrial adenocarcinoma	Gynae	Used in CUPiD
TCGA-A5-A0GG-01	TCGA	UCEC	Endometrioid endometrial adenocarcinoma	Gynae	Used in CUPiD
TCGA-A5-A0GQ-01	TCGA	UCEC	Endometrioid endometrial adenocarcinoma	Gynae	Used in CUPiD
TCGA-A5-A0GR-01	TCGA	UCEC	Endometrioid endometrial adenocarcinoma	Gynae	Used in CUPiD
TCGA-A5-A0VO-01	TCGA	UCEC	Endometrioid endometrial adenocarcinoma	Gynae	Used in CUPiD
TCGA-A5-A1OF-01	TCGA	UCEC	Mixed serous and endometrioid	Gynae	Used in CUPiD
TCGA-A5-A1OG-01	TCGA	UCEC	Serous endometrial adenocarcinoma	Gynae	Used in CUPiD
TCGA-A5-A1OH-01	TCGA	UCEC	Serous endometrial adenocarcinoma	Gynae	Used in CUPiD
TCGA-A5-A1OJ-01	TCGA	UCEC	Endometrioid endometrial adenocarcinoma	Gynae	Used in CUPiD
TCGA-A5-A1OK-01	TCGA	UCEC	Endometrioid endometrial adenocarcinoma	Gynae	Used in CUPiD
TCGA-A5-A2K2-01	TCGA	UCEC	Serous endometrial adenocarcinoma	Gynae	Used in CUPiD
TCGA-A5-A2K3-01	TCGA	UCEC	Serous endometrial adenocarcinoma	Gynae	Used in CUPiD
TCGA-A5-A2K4-01	TCGA	UCEC	Serous endometrial adenocarcinoma	Gynae	Used in CUPiD
TCGA-A5-A2K5-01	TCGA	UCEC	Endometrioid endometrial adenocarcinoma	Gynae	Used in CUPiD
TCGA-A5-A2K7-01	TCGA	UCEC	Endometrioid endometrial adenocarcinoma	Gynae	Used in CUPiD
TCGA-A5-A3LO-01	TCGA	UCEC	Endometrioid endometrial adenocarcinoma	Gynae	Used in CUPiD
TCGA-A5-A3LP-01	TCGA	UCEC	Serous endometrial adenocarcinoma	Gynae	Used in CUPiD
TCGA-A5-A7WJ-01	TCGA	UCEC	Endometrioid endometrial adenocarcinoma	Gynae	Used in CUPiD
TCGA-A5-A7WK-01	TCGA	UCEC	Mixed serous and endometrioid	Gynae	Used in CUPiD
TCGA-A5-AB3J-01	TCGA	UCEC	Endometrioid endometrial adenocarcinoma	Gynae	Used in CUPiD
TCGA-A6-2671-01	TCGA	COAD	Colon Adenocarcinoma	LowerGI	Used in CUPiD
TCGA-A6-2671-11	TCGA	COAD	Colon Adenocarcinoma	Normal Tissue	Adjacent Normal
TCGA-A6-2675-01	TCGA	COAD	Colon Adenocarcinoma	LowerGI	Used in CUPiD
TCGA-A6-2675-11	TCGA	COAD	Colon Adenocarcinoma	Normal Tissue	Adjacent Normal
TCGA-A6-2677-01	TCGA	COAD	Colon Adenocarcinoma	LowerGI	Used in CUPiD
TCGA-A6-2679-01	TCGA	COAD	Colon Adenocarcinoma	LowerGI	Used in CUPiD
TCGA-A6-2679-11	TCGA	COAD	Colon Adenocarcinoma	Normal Tissue	Adjacent Normal
TCGA-A6-2680-01	TCGA	COAD	Colon Adenocarcinoma	LowerGI	Used in CUPiD
TCGA-A6-2680-11	TCGA	COAD	Colon Adenocarcinoma	Normal Tissue	Adjacent Normal
TCGA-A6-2681-01	TCGA	COAD	Colon Adenocarcinoma	LowerGI	Used in CUPiD
TCGA-A6-2681-11	TCGA	COAD	Colon Adenocarcinoma	Normal Tissue	Adjacent Normal
TCGA-A6-2682-01	TCGA	COAD	Colon Adenocarcinoma	LowerGI	Used in CUPiD
TCGA-A6-2682-11	TCGA	COAD	Colon Adenocarcinoma	Normal Tissue	Adjacent Normal
TCGA-A6-2684-01	TCGA	COAD	Colon Adenocarcinoma	LowerGI	Used in CUPiD
TCGA-A6-2684-11	TCGA	COAD	Colon Adenocarcinoma	Normal Tissue	Adjacent Normal
TCGA-A6-2685-01	TCGA	COAD	Colon Adenocarcinoma	LowerGI	Used in CUPiD
TCGA-A6-2685-11	TCGA	COAD	Colon Adenocarcinoma	Normal Tissue	Adjacent Normal
TCGA-A6-2686-01	TCGA	COAD	Colon Adenocarcinoma	LowerGI	Used in CUPiD
TCGA-A6-2686-11	TCGA	COAD	Colon Adenocarcinoma	Normal Tissue	Adjacent Normal
TCGA-A6-3809-01	TCGA	COAD	Colon Mucinous Adenocarcinoma	LowerGI	Used in CUPiD
TCGA-A6-3810-01	TCGA	COAD	Colon Adenocarcinoma	LowerGI	Used in CUPiD
TCGA-A6-4105-01	TCGA	COAD	Colon Adenocarcinoma	LowerGI	Used in CUPiD
TCGA-A6-4107-01	TCGA	COAD	Colon Adenocarcinoma	LowerGI	Used in CUPiD
TCGA-A6-4107-11	TCGA	COAD	Colon Adenocarcinoma	Normal Tissue	Adjacent Normal
TCGA-A6-5656-01	TCGA	COAD	Colon Adenocarcinoma	LowerGI	Used in CUPiD
TCGA-A6-5657-01	TCGA	COAD	Colon Adenocarcinoma	LowerGI	Used in CUPiD
TCGA-A6-5659-01	TCGA	COAD	Colon Adenocarcinoma	LowerGI	Used in CUPiD
TCGA-A6-5660-01	TCGA	COAD	Colon Adenocarcinoma	LowerGI	Used in CUPiD
TCGA-A6-5661-01	TCGA	COAD	Colon Adenocarcinoma	LowerGI	Used in CUPiD
TCGA-A6-5662-01	TCGA	COAD	Colon Adenocarcinoma	LowerGI	Used in CUPiD
TCGA-A6-5664-01	TCGA	COAD	Colon Adenocarcinoma	LowerGI	Used in CUPiD
TCGA-A6-5665-01	TCGA	COAD	Colon Adenocarcinoma	LowerGI	Used in CUPiD
TCGA-A6-5666-01	TCGA	COAD	Colon Adenocarcinoma	LowerGI	Used in CUPiD
TCGA-A6-5667-01	TCGA	COAD	Colon Adenocarcinoma	LowerGI	Used in CUPiD
TCGA-A6-5667-11	TCGA	COAD	Colon Adenocarcinoma	Normal Tissue	Adjacent Normal
TCGA-A6-6137-01	TCGA	COAD	Colon Adenocarcinoma	LowerGI	Used in CUPiD
TCGA-A6-6138-01	TCGA	COAD	Colon Adenocarcinoma	LowerGI	Used in CUPiD
TCGA-A6-6140-01	TCGA	COAD	Colon Adenocarcinoma	LowerGI	Used in CUPiD
TCGA-A6-6141-01	TCGA	COAD	Colon Adenocarcinoma	LowerGI	Used in CUPiD
TCGA-A6-6142-01	TCGA	COAD	Colon Adenocarcinoma	LowerGI	Used in CUPiD
TCGA-A6-6648-01	TCGA	COAD	Colon Adenocarcinoma	LowerGI	Used in CUPiD
TCGA-A6-6649-01	TCGA	COAD	Colon Adenocarcinoma	LowerGI	Used in CUPiD
TCGA-A6-6650-01	TCGA	COAD	Colon Adenocarcinoma	LowerGI	Used in CUPiD
TCGA-A6-6651-01	TCGA	COAD	Colon Adenocarcinoma	LowerGI	Used in CUPiD
TCGA-A6-6652-01	TCGA	COAD	Colon Adenocarcinoma	LowerGI	Used in CUPiD
TCGA-A6-6653-01	TCGA	COAD	Colon Adenocarcinoma	LowerGI	Used in CUPiD
TCGA-A6-6654-01	TCGA	COAD	Colon Adenocarcinoma	LowerGI	Used in CUPiD
TCGA-A6-6780-01	TCGA	COAD	Colon Mucinous Adenocarcinoma	LowerGI	Used in CUPiD
TCGA-A6-6781-01	TCGA	COAD	Colon Mucinous Adenocarcinoma	LowerGI	Used in CUPiD
TCGA-A6-6782-01	TCGA	COAD	Colon Adenocarcinoma	LowerGI	Used in CUPiD
TCGA-A6-A565-01	TCGA	COAD	Colon Mucinous Adenocarcinoma	LowerGI	Used in CUPiD
TCGA-A6-A566-01	TCGA	COAD	Colon Mucinous Adenocarcinoma	LowerGI	Used in CUPiD
TCGA-A6-A567-01	TCGA	COAD	Colon Adenocarcinoma	LowerGI	Used in CUPiD
TCGA-A6-A56B-01	TCGA	COAD	Colon Adenocarcinoma	LowerGI	Used in CUPiD
TCGA-A6-A5ZU-01	TCGA	COAD	Colon Adenocarcinoma	LowerGI	Used in CUPiD
TCGA-A7-A0CE-11	TCGA	BRCA	Infiltrating Ductal Carcinoma	Normal Tissue	Adjacent Normal
TCGA-A7-A0CH-11	TCGA	BRCA	Infiltrating Ductal Carcinoma	Normal Tissue	Adjacent Normal
TCGA-A7-A0D9-01	TCGA	BRCA	Infiltrating Ductal Carcinoma	BRCA	Used in CUPiD
TCGA-A7-A0DC-11	TCGA	BRCA	Infiltrating Ductal Carcinoma	NotUsed	Redacted
TCGA-A7-A13D-01	TCGA	BRCA	Infiltrating Ductal Carcinoma	BRCA	Used in CUPiD
TCGA-A7-A13E-01	TCGA	BRCA	Infiltrating Ductal Carcinoma	BRCA	Used in CUPiD
TCGA-A7-A13E-11	TCGA	BRCA	Infiltrating Ductal Carcinoma	Normal Tissue	Adjacent Normal
TCGA-A7-A13F-01	TCGA	BRCA	Infiltrating Ductal Carcinoma	BRCA	Used in CUPiD
TCGA-A7-A13F-11	TCGA	BRCA	Infiltrating Ductal Carcinoma	Normal Tissue	Adjacent Normal
TCGA-A7-A13G-01	TCGA	BRCA	Infiltrating Ductal Carcinoma	BRCA	Used in CUPiD
TCGA-A7-A13H-01	TCGA	BRCA	Infiltrating Lobular Carcinoma	BRCA	Used in CUPiD
TCGA-A7-A26E-01	TCGA	BRCA	Infiltrating Lobular Carcinoma	BRCA	Used in CUPiD
TCGA-A7-A26F-01	TCGA	BRCA	Other, specify	BRCA	Used in CUPiD
TCGA-A7-A26G-01	TCGA	BRCA	Other, specify	BRCA	Used in CUPiD
TCGA-A7-A26H-01	TCGA	BRCA	Infiltrating Ductal Carcinoma	BRCA	Used in CUPiD
TCGA-A7-A26I-01	TCGA	BRCA	Infiltrating Ductal Carcinoma	BRCA	Used in CUPiD
TCGA-A7-A26J-01	TCGA	BRCA	Infiltrating Ductal Carcinoma	BRCA	Used in CUPiD
TCGA-A7-A2KD-01	TCGA	BRCA	Infiltrating Ductal Carcinoma	BRCA	Used in CUPiD
TCGA-A7-A3IY-01	TCGA	BRCA	Mucinous Carcinoma	BRCA	Used in CUPiD
TCGA-A7-A3IZ-01	TCGA	BRCA	Infiltrating Lobular Carcinoma	BRCA	Used in CUPiD
TCGA-A7-A3J0-01	TCGA	BRCA	Mucinous Carcinoma	BRCA	Used in CUPiD
TCGA-A7-A3J1-01	TCGA	BRCA	Infiltrating Lobular Carcinoma	BRCA	Used in CUPiD
TCGA-A7-A3RF-01	TCGA	BRCA	Mucinous Carcinoma	BRCA	Used in CUPiD
TCGA-A7-A425-01	TCGA	BRCA	Infiltrating Lobular Carcinoma	BRCA	Used in CUPiD
TCGA-A7-A426-01	TCGA	BRCA	Infiltrating Lobular Carcinoma	BRCA	Used in CUPiD
TCGA-A7-A4SA-01	TCGA	BRCA	Infiltrating Lobular Carcinoma	BRCA	Used in CUPiD
TCGA-A7-A4SB-01	TCGA	BRCA	Infiltrating Lobular Carcinoma	BRCA	Used in CUPiD
TCGA-A7-A4SC-01	TCGA	BRCA	Infiltrating Lobular Carcinoma	BRCA	Used in CUPiD
TCGA-A7-A4SD-01	TCGA	BRCA	Infiltrating Ductal Carcinoma	BRCA	Used in CUPiD
TCGA-A7-A4SE-01	TCGA	BRCA	Infiltrating Ductal Carcinoma	BRCA	Used in CUPiD
TCGA-A7-A4SF-01	TCGA	BRCA	Infiltrating Ductal Carcinoma	BRCA	Used in CUPiD
TCGA-A7-A56D-01	TCGA	BRCA	Infiltrating Ductal Carcinoma	BRCA	Used in CUPiD
TCGA-A7-A5ZV-01	TCGA	BRCA	Infiltrating Carcinoma NOS	BRCA	Used in CUPiD
TCGA-A7-A5ZW-01	TCGA	BRCA	Infiltrating Ductal Carcinoma	BRCA	Used in CUPiD
TCGA-A7-A5ZX-01	TCGA	BRCA	Infiltrating Lobular Carcinoma	BRCA	Used in CUPiD
TCGA-A7-A6VV-01	TCGA	BRCA	Infiltrating Ductal Carcinoma	BRCA	Used in CUPiD
TCGA-A7-A6VW-01	TCGA	BRCA	Infiltrating Ductal Carcinoma	BRCA	Used in CUPiD
TCGA-A7-A6VX-01	TCGA	BRCA	Infiltrating Ductal Carcinoma	BRCA	Used in CUPiD
TCGA-A7-A6VY-01	TCGA	BRCA	Infiltrating Ductal Carcinoma	BRCA	Used in CUPiD
TCGA-A8-A075-01	TCGA	BRCA	Infiltrating Ductal Carcinoma	BRCA	Used in CUPiD
TCGA-A8-A08O-01	TCGA	BRCA	Infiltrating Ductal Carcinoma	BRCA	Used in CUPiD
TCGA-A8-A0A6-01	TCGA	BRCA	Infiltrating Lobular Carcinoma	BRCA	Used in CUPiD
TCGA-A8-A0AD-01	TCGA	BRCA	Mixed Histology (please specify)	BRCA	Used in CUPiD
TCGA-AA-3488-01	TCGA	COAD	Colon Adenocarcinoma	LowerGI	Used in CUPiD
TCGA-AA-3488-11	TCGA	COAD	Colon Adenocarcinoma	Normal Tissue	Adjacent Normal
TCGA-AA-3489-01	TCGA	COAD	Colon Adenocarcinoma	LowerGI	Used in CUPiD
TCGA-AA-3492-01	TCGA	COAD	Colon Adenocarcinoma	LowerGI	Used in CUPiD
TCGA-AA-3492-11	TCGA	COAD	Colon Adenocarcinoma	Normal Tissue	Adjacent Normal
TCGA-AA-3494-01	TCGA	COAD	Colon Adenocarcinoma	LowerGI	Used in CUPiD
TCGA-AA-3494-11	TCGA	COAD	Colon Adenocarcinoma	Normal Tissue	Adjacent Normal
TCGA-AA-3495-01	TCGA	COAD	Colon Adenocarcinoma	LowerGI	Used in CUPiD
TCGA-AA-3495-11	TCGA	COAD	Colon Adenocarcinoma	Normal Tissue	Adjacent Normal
TCGA-AA-3496-01	TCGA	COAD	Colon Adenocarcinoma	LowerGI	Used in CUPiD
TCGA-AA-3502-01	TCGA	COAD	Colon Adenocarcinoma	LowerGI	Used in CUPiD
TCGA-AA-3502-11	TCGA	COAD	Colon Adenocarcinoma	Normal Tissue	Adjacent Normal
TCGA-AA-3506-01	TCGA	COAD	Colon Adenocarcinoma	LowerGI	Used in CUPiD
TCGA-AA-3506-11	TCGA	COAD	Colon Adenocarcinoma	Normal Tissue	Adjacent Normal
TCGA-AA-3509-01	TCGA	COAD	Colon Adenocarcinoma	LowerGI	Used in CUPiD
TCGA-AA-3509-11	TCGA	COAD	Colon Adenocarcinoma	Normal Tissue	Adjacent Normal
TCGA-AA-3510-01	TCGA	COAD	Colon Adenocarcinoma	LowerGI	Used in CUPiD
TCGA-AA-3510-11	TCGA	COAD	Colon Adenocarcinoma	Normal Tissue	Adjacent Normal
TCGA-AA-3511-01	TCGA	COAD	Colon Adenocarcinoma	LowerGI	Used in CUPiD
TCGA-AA-3655-01	TCGA	COAD	Colon Adenocarcinoma	LowerGI	Used in CUPiD
TCGA-AA-3655-11	TCGA	COAD	Colon Adenocarcinoma	Normal Tissue	Adjacent Normal
TCGA-AA-3660-01	TCGA	COAD	Colon Adenocarcinoma	LowerGI	Used in CUPiD
TCGA-AA-3660-11	TCGA	COAD	Colon Adenocarcinoma	Normal Tissue	Adjacent Normal
TCGA-AA-3663-01	TCGA	COAD	Colon Adenocarcinoma	LowerGI	Used in CUPiD
TCGA-AA-3663-11	TCGA	COAD	Colon Adenocarcinoma	Normal Tissue	Adjacent Normal
TCGA-AA-3712-01	TCGA	COAD	Colon Adenocarcinoma	LowerGI	Used in CUPiD
TCGA-AA-3712-11	TCGA	COAD	Colon Adenocarcinoma	Normal Tissue	Adjacent Normal
TCGA-AA-3713-01	TCGA	COAD	Colon Adenocarcinoma	LowerGI	Used in CUPiD
TCGA-AA-3713-11	TCGA	COAD	Colon Adenocarcinoma	Normal Tissue	Adjacent Normal
TCGA-AB-2802-03	TCGA	LAML	NA	LAML	Used in CUPiD
TCGA-AB-2803-03	TCGA	LAML	NA	LAML	Used in CUPiD
TCGA-AB-2804-03	TCGA	LAML	NA	LAML	Used in CUPiD
TCGA-AB-2805-03	TCGA	LAML	NA	LAML	Used in CUPiD
TCGA-AB-2806-03	TCGA	LAML	NA	LAML	Used in CUPiD
TCGA-AB-2807-03	TCGA	LAML	NA	LAML	Used in CUPiD
TCGA-AB-2808-03	TCGA	LAML	NA	LAML	Used in CUPiD
TCGA-AB-2809-03	TCGA	LAML	NA	LAML	Used in CUPiD
TCGA-AB-2810-03	TCGA	LAML	NA	LAML	Used in CUPiD
TCGA-AB-2811-03	TCGA	LAML	NA	LAML	Used in CUPiD
TCGA-AB-2812-03	TCGA	LAML	NA	LAML	Used in CUPiD
TCGA-AB-2813-03	TCGA	LAML	NA	LAML	Used in CUPiD
TCGA-AB-2814-03	TCGA	LAML	NA	LAML	Used in CUPiD
TCGA-AB-2815-03	TCGA	LAML	NA	LAML	Used in CUPiD
TCGA-AB-2816-03	TCGA	LAML	NA	LAML	Used in CUPiD
TCGA-AB-2817-03	TCGA	LAML	NA	LAML	Used in CUPiD
TCGA-AB-2818-03	TCGA	LAML	NA	LAML	Used in CUPiD
TCGA-AB-2819-03	TCGA	LAML	NA	LAML	Used in CUPiD
TCGA-AB-2820-03	TCGA	LAML	NA	LAML	Used in CUPiD
TCGA-AB-2821-03	TCGA	LAML	NA	LAML	Used in CUPiD
TCGA-AB-2822-03	TCGA	LAML	NA	LAML	Used in CUPiD
TCGA-AB-2823-03	TCGA	LAML	NA	LAML	Used in CUPiD
TCGA-AB-2824-03	TCGA	LAML	NA	LAML	Used in CUPiD
TCGA-AB-2825-03	TCGA	LAML	NA	LAML	Used in CUPiD
TCGA-AB-2826-03	TCGA	LAML	NA	LAML	Used in CUPiD
TCGA-AB-2827-03	TCGA	LAML	NA	LAML	Used in CUPiD
TCGA-AB-2828-03	TCGA	LAML	NA	LAML	Used in CUPiD
TCGA-AB-2829-03	TCGA	LAML	NA	LAML	Used in CUPiD
TCGA-AB-2830-03	TCGA	LAML	NA	LAML	Used in CUPiD
TCGA-AB-2831-03	TCGA	LAML	NA	LAML	Used in CUPiD
TCGA-AB-2832-03	TCGA	LAML	NA	LAML	Used in CUPiD
TCGA-AB-2833-03	TCGA	LAML	NA	LAML	Used in CUPiD
TCGA-AB-2834-03	TCGA	LAML	NA	LAML	Used in CUPiD
TCGA-AB-2835-03	TCGA	LAML	NA	LAML	Used in CUPiD
TCGA-AB-2836-03	TCGA	LAML	NA	LAML	Used in CUPiD
TCGA-AB-2837-03	TCGA	LAML	NA	LAML	Used in CUPiD
TCGA-AB-2838-03	TCGA	LAML	NA	LAML	Used in CUPiD
TCGA-AB-2839-03	TCGA	LAML	NA	LAML	Used in CUPiD
TCGA-AB-2840-03	TCGA	LAML	NA	LAML	Used in CUPiD
TCGA-AB-2841-03	TCGA	LAML	NA	LAML	Used in CUPiD
TCGA-AB-2842-03	TCGA	LAML	NA	LAML	Used in CUPiD
TCGA-AB-2843-03	TCGA	LAML	NA	LAML	Used in CUPiD
TCGA-AB-2844-03	TCGA	LAML	NA	LAML	Used in CUPiD
TCGA-AB-2845-03	TCGA	LAML	NA	LAML	Used in CUPiD
TCGA-AB-2846-03	TCGA	LAML	NA	LAML	Used in CUPiD
TCGA-AB-2847-03	TCGA	LAML	NA	LAML	Used in CUPiD
TCGA-AB-2848-03	TCGA	LAML	NA	LAML	Used in CUPiD
TCGA-AB-2849-03	TCGA	LAML	NA	LAML	Used in CUPiD
TCGA-AB-2851-03	TCGA	LAML	NA	LAML	Used in CUPiD
TCGA-AB-2853-03	TCGA	LAML	NA	LAML	Used in CUPiD
TCGA-AB-2854-03	TCGA	LAML	NA	LAML	Used in CUPiD
TCGA-AB-2855-03	TCGA	LAML	NA	LAML	Used in CUPiD
TCGA-AB-2856-03	TCGA	LAML	NA	LAML	Used in CUPiD
TCGA-AB-2857-03	TCGA	LAML	NA	LAML	Used in CUPiD
TCGA-AB-2858-03	TCGA	LAML	NA	LAML	Used in CUPiD
TCGA-AB-2860-03	TCGA	LAML	NA	LAML	Used in CUPiD
TCGA-AB-2861-03	TCGA	LAML	NA	LAML	Used in CUPiD
TCGA-AB-2862-03	TCGA	LAML	NA	LAML	Used in CUPiD
TCGA-AB-2863-03	TCGA	LAML	NA	LAML	Used in CUPiD
TCGA-AB-2866-03	TCGA	LAML	NA	LAML	Used in CUPiD
TCGA-AB-2867-03	TCGA	LAML	NA	LAML	Used in CUPiD
TCGA-AB-2868-03	TCGA	LAML	NA	LAML	Used in CUPiD
TCGA-AB-2869-03	TCGA	LAML	NA	LAML	Used in CUPiD
TCGA-AB-2870-03	TCGA	LAML	NA	LAML	Used in CUPiD
TCGA-AB-2871-03	TCGA	LAML	NA	LAML	Used in CUPiD
TCGA-AB-2872-03	TCGA	LAML	NA	LAML	Used in CUPiD
TCGA-AB-2873-03	TCGA	LAML	NA	LAML	Used in CUPiD
TCGA-AB-2874-03	TCGA	LAML	NA	LAML	Used in CUPiD
TCGA-AB-2875-03	TCGA	LAML	NA	LAML	Used in CUPiD
TCGA-AB-2876-03	TCGA	LAML	NA	LAML	Used in CUPiD
TCGA-AB-2877-03	TCGA	LAML	NA	LAML	Used in CUPiD
TCGA-AB-2878-03	TCGA	LAML	NA	LAML	Used in CUPiD
TCGA-AB-2879-03	TCGA	LAML	NA	LAML	Used in CUPiD
TCGA-AB-2880-03	TCGA	LAML	NA	LAML	Used in CUPiD
TCGA-AB-2881-03	TCGA	LAML	NA	LAML	Used in CUPiD
TCGA-AB-2882-03	TCGA	LAML	NA	LAML	Used in CUPiD
TCGA-AB-2883-03	TCGA	LAML	NA	LAML	Used in CUPiD
TCGA-AB-2884-03	TCGA	LAML	NA	LAML	Used in CUPiD
TCGA-AB-2885-03	TCGA	LAML	NA	LAML	Used in CUPiD
TCGA-AB-2886-03	TCGA	LAML	NA	LAML	Used in CUPiD
TCGA-AB-2887-03	TCGA	LAML	NA	LAML	Used in CUPiD
TCGA-AB-2888-03	TCGA	LAML	NA	LAML	Used in CUPiD
TCGA-AB-2889-03	TCGA	LAML	NA	LAML	Used in CUPiD
TCGA-AB-2890-03	TCGA	LAML	NA	LAML	Used in CUPiD
TCGA-AB-2891-03	TCGA	LAML	NA	LAML	Used in CUPiD
TCGA-AB-2892-03	TCGA	LAML	NA	LAML	Used in CUPiD
TCGA-AB-2893-03	TCGA	LAML	NA	LAML	Used in CUPiD
TCGA-AB-2894-03	TCGA	LAML	NA	LAML	Used in CUPiD
TCGA-AB-2895-03	TCGA	LAML	NA	LAML	Used in CUPiD
TCGA-AB-2896-03	TCGA	LAML	NA	LAML	Used in CUPiD
TCGA-AB-2897-03	TCGA	LAML	NA	LAML	Used in CUPiD
TCGA-AB-2898-03	TCGA	LAML	NA	LAML	Used in CUPiD
TCGA-AB-2899-03	TCGA	LAML	NA	LAML	Used in CUPiD
TCGA-AB-2900-03	TCGA	LAML	NA	LAML	Used in CUPiD
TCGA-AB-2901-03	TCGA	LAML	NA	LAML	Used in CUPiD
TCGA-AB-2903-03	TCGA	LAML	NA	LAML	Used in CUPiD
TCGA-AB-2904-03	TCGA	LAML	NA	LAML	Used in CUPiD
TCGA-AB-2906-03	TCGA	LAML	NA	LAML	Used in CUPiD
TCGA-AB-2907-03	TCGA	LAML	NA	LAML	Used in CUPiD
TCGA-AB-2908-03	TCGA	LAML	NA	LAML	Used in CUPiD
TCGA-AB-2909-03	TCGA	LAML	NA	LAML	Used in CUPiD
TCGA-AB-2910-03	TCGA	LAML	NA	LAML	Used in CUPiD
TCGA-AB-2911-03	TCGA	LAML	NA	LAML	Used in CUPiD
TCGA-AB-2912-03	TCGA	LAML	NA	LAML	Used in CUPiD
TCGA-AB-2913-03	TCGA	LAML	NA	LAML	Used in CUPiD
TCGA-AB-2914-03	TCGA	LAML	NA	LAML	Used in CUPiD
TCGA-AB-2915-03	TCGA	LAML	NA	LAML	Used in CUPiD
TCGA-AB-2916-03	TCGA	LAML	NA	LAML	Used in CUPiD
TCGA-AB-2917-03	TCGA	LAML	NA	LAML	Used in CUPiD
TCGA-AB-2918-03	TCGA	LAML	NA	LAML	Used in CUPiD
TCGA-AB-2919-03	TCGA	LAML	NA	LAML	Used in CUPiD
TCGA-AB-2920-03	TCGA	LAML	NA	LAML	Used in CUPiD
TCGA-AB-2921-03	TCGA	LAML	NA	LAML	Used in CUPiD
TCGA-AB-2922-03	TCGA	LAML	NA	LAML	Used in CUPiD
TCGA-AB-2923-03	TCGA	LAML	NA	LAML	Used in CUPiD
TCGA-AB-2924-03	TCGA	LAML	NA	LAML	Used in CUPiD
TCGA-AB-2925-03	TCGA	LAML	NA	LAML	Used in CUPiD
TCGA-AB-2926-03	TCGA	LAML	NA	LAML	Used in CUPiD
TCGA-AB-2927-03	TCGA	LAML	NA	LAML	Used in CUPiD
TCGA-AB-2928-03	TCGA	LAML	NA	LAML	Used in CUPiD
TCGA-AB-2929-03	TCGA	LAML	NA	LAML	Used in CUPiD
TCGA-AB-2930-03	TCGA	LAML	NA	LAML	Used in CUPiD
TCGA-AB-2931-03	TCGA	LAML	NA	LAML	Used in CUPiD
TCGA-AB-2932-03	TCGA	LAML	NA	LAML	Used in CUPiD
TCGA-AB-2933-03	TCGA	LAML	NA	LAML	Used in CUPiD
TCGA-AB-2934-03	TCGA	LAML	NA	LAML	Used in CUPiD
TCGA-AB-2935-03	TCGA	LAML	NA	LAML	Used in CUPiD
TCGA-AB-2936-03	TCGA	LAML	NA	LAML	Used in CUPiD
TCGA-AB-2937-03	TCGA	LAML	NA	LAML	Used in CUPiD
TCGA-AB-2938-03	TCGA	LAML	NA	LAML	Used in CUPiD
TCGA-AB-2939-03	TCGA	LAML	NA	LAML	Used in CUPiD
TCGA-AB-2940-03	TCGA	LAML	NA	LAML	Used in CUPiD
TCGA-AB-2941-03	TCGA	LAML	NA	LAML	Used in CUPiD
TCGA-AB-2942-03	TCGA	LAML	NA	LAML	Used in CUPiD
TCGA-AB-2943-03	TCGA	LAML	NA	LAML	Used in CUPiD
TCGA-AB-2944-03	TCGA	LAML	NA	LAML	Used in CUPiD
TCGA-AB-2945-03	TCGA	LAML	NA	LAML	Used in CUPiD
TCGA-AB-2946-03	TCGA	LAML	NA	LAML	Used in CUPiD
TCGA-AB-2947-03	TCGA	LAML	NA	LAML	Used in CUPiD
TCGA-AB-2948-03	TCGA	LAML	NA	LAML	Used in CUPiD
TCGA-AB-2949-03	TCGA	LAML	NA	LAML	Used in CUPiD
TCGA-AB-2950-03	TCGA	LAML	NA	LAML	Used in CUPiD
TCGA-AB-2952-03	TCGA	LAML	NA	LAML	Used in CUPiD
TCGA-AB-2954-03	TCGA	LAML	NA	LAML	Used in CUPiD
TCGA-AB-2955-03	TCGA	LAML	NA	LAML	Used in CUPiD
TCGA-AB-2956-03	TCGA	LAML	NA	LAML	Used in CUPiD
TCGA-AB-2957-03	TCGA	LAML	NA	LAML	Used in CUPiD
TCGA-AB-2959-03	TCGA	LAML	NA	LAML	Used in CUPiD
TCGA-AB-2963-03	TCGA	LAML	NA	LAML	Used in CUPiD
TCGA-AB-2964-03	TCGA	LAML	NA	LAML	Used in CUPiD
TCGA-AB-2965-03	TCGA	LAML	NA	LAML	Used in CUPiD
TCGA-AB-2966-03	TCGA	LAML	NA	LAML	Used in CUPiD
TCGA-AB-2967-03	TCGA	LAML	NA	LAML	Used in CUPiD
TCGA-AB-2968-03	TCGA	LAML	NA	LAML	Used in CUPiD
TCGA-AB-2969-03	TCGA	LAML	NA	LAML	Used in CUPiD
TCGA-AB-2970-03	TCGA	LAML	NA	LAML	Used in CUPiD
TCGA-AB-2971-03	TCGA	LAML	NA	LAML	Used in CUPiD
TCGA-AB-2972-03	TCGA	LAML	NA	LAML	Used in CUPiD
TCGA-AB-2973-03	TCGA	LAML	NA	LAML	Used in CUPiD
TCGA-AB-2974-03	TCGA	LAML	NA	LAML	Used in CUPiD
TCGA-AB-2975-03	TCGA	LAML	NA	LAML	Used in CUPiD
TCGA-AB-2976-03	TCGA	LAML	NA	LAML	Used in CUPiD
TCGA-AB-2977-03	TCGA	LAML	NA	LAML	Used in CUPiD
TCGA-AB-2978-03	TCGA	LAML	NA	LAML	Used in CUPiD
TCGA-AB-2979-03	TCGA	LAML	NA	LAML	Used in CUPiD
TCGA-AB-2980-03	TCGA	LAML	NA	LAML	Used in CUPiD
TCGA-AB-2981-03	TCGA	LAML	NA	LAML	Used in CUPiD
TCGA-AB-2982-03	TCGA	LAML	NA	LAML	Used in CUPiD
TCGA-AB-2983-03	TCGA	LAML	NA	LAML	Used in CUPiD
TCGA-AB-2984-03	TCGA	LAML	NA	LAML	Used in CUPiD
TCGA-AB-2985-03	TCGA	LAML	NA	LAML	Used in CUPiD
TCGA-AB-2986-03	TCGA	LAML	NA	LAML	Used in CUPiD
TCGA-AB-2987-03	TCGA	LAML	NA	LAML	Used in CUPiD
TCGA-AB-2988-03	TCGA	LAML	NA	LAML	Used in CUPiD
TCGA-AB-2989-03	TCGA	LAML	NA	LAML	Used in CUPiD
TCGA-AB-2990-03	TCGA	LAML	NA	LAML	Used in CUPiD
TCGA-AB-2991-03	TCGA	LAML	NA	LAML	Used in CUPiD
TCGA-AB-2992-03	TCGA	LAML	NA	LAML	Used in CUPiD
TCGA-AB-2993-03	TCGA	LAML	NA	LAML	Used in CUPiD
TCGA-AB-2995-03	TCGA	LAML	NA	LAML	Used in CUPiD
TCGA-AB-2996-03	TCGA	LAML	NA	LAML	Used in CUPiD
TCGA-AB-2997-03	TCGA	LAML	NA	LAML	Used in CUPiD
TCGA-AB-2998-03	TCGA	LAML	NA	LAML	Used in CUPiD
TCGA-AB-2999-03	TCGA	LAML	NA	LAML	Used in CUPiD
TCGA-AB-3000-03	TCGA	LAML	NA	LAML	Used in CUPiD
TCGA-AB-3001-03	TCGA	LAML	NA	LAML	Used in CUPiD
TCGA-AB-3002-03	TCGA	LAML	NA	LAML	Used in CUPiD
TCGA-AB-3005-03	TCGA	LAML	NA	LAML	Used in CUPiD
TCGA-AB-3006-03	TCGA	LAML	NA	LAML	Used in CUPiD
TCGA-AB-3007-03	TCGA	LAML	NA	LAML	Used in CUPiD
TCGA-AB-3008-03	TCGA	LAML	NA	LAML	Used in CUPiD
TCGA-AB-3009-03	TCGA	LAML	NA	LAML	Used in CUPiD
TCGA-AB-3011-03	TCGA	LAML	NA	LAML	Used in CUPiD
TCGA-AB-3012-03	TCGA	LAML	NA	LAML	Used in CUPiD
TCGA-AC-A23C-01	TCGA	BRCA	Infiltrating Ductal Carcinoma	BRCA	Used in CUPiD
TCGA-AC-A23E-01	TCGA	BRCA	Infiltrating Ductal Carcinoma	BRCA	Used in CUPiD
TCGA-AC-A23G-01	TCGA	BRCA	Infiltrating Lobular Carcinoma	BRCA	Used in CUPiD
TCGA-AC-A23H-01	TCGA	BRCA	Infiltrating Ductal Carcinoma	BRCA	Used in CUPiD
TCGA-AC-A23H-11	TCGA	BRCA	Infiltrating Ductal Carcinoma	Normal Tissue	Adjacent Normal
TCGA-AC-A2B8-01	TCGA	BRCA	Infiltrating Lobular Carcinoma	BRCA	Used in CUPiD
TCGA-AC-A2BK-01	TCGA	BRCA	Infiltrating Ductal Carcinoma	BRCA	Used in CUPiD
TCGA-AC-A2BM-01	TCGA	BRCA	Infiltrating Ductal Carcinoma	BRCA	Used in CUPiD
TCGA-AC-A2FB-01	TCGA	BRCA	Infiltrating Lobular Carcinoma	BRCA	Used in CUPiD
TCGA-AC-A2FB-11	TCGA	BRCA	Infiltrating Lobular Carcinoma	Normal Tissue	Adjacent Normal
TCGA-AC-A2FE-01	TCGA	BRCA	Infiltrating Lobular Carcinoma	BRCA	Used in CUPiD
TCGA-AC-A2FF-01	TCGA	BRCA	Infiltrating Lobular Carcinoma	BRCA	Used in CUPiD
TCGA-AC-A2FF-11	TCGA	BRCA	Infiltrating Lobular Carcinoma	Normal Tissue	Adjacent Normal
TCGA-AC-A2FG-01	TCGA	BRCA	Infiltrating Lobular Carcinoma	BRCA	Used in CUPiD
TCGA-AC-A2FG-11	TCGA	BRCA	Infiltrating Lobular Carcinoma	Normal Tissue	Adjacent Normal
TCGA-AC-A2FK-01	TCGA	BRCA	Infiltrating Lobular Carcinoma	BRCA	Used in CUPiD
TCGA-AC-A2FM-01	TCGA	BRCA	Infiltrating Lobular Carcinoma	BRCA	Used in CUPiD
TCGA-AC-A2FM-11	TCGA	BRCA	Infiltrating Lobular Carcinoma	Normal Tissue	Adjacent Normal
TCGA-AC-A2FO-01	TCGA	BRCA	Infiltrating Lobular Carcinoma	BRCA	Used in CUPiD
TCGA-AC-A2QH-01	TCGA	BRCA	Metaplastic Carcinoma	BRCA	Used in CUPiD
TCGA-AC-A2QI-01	TCGA	BRCA	Infiltrating Lobular Carcinoma	BRCA	Used in CUPiD
TCGA-AC-A2QJ-01	TCGA	BRCA	Metaplastic Carcinoma	BRCA	Used in CUPiD
TCGA-AC-A3BB-01	TCGA	BRCA	Infiltrating Lobular Carcinoma	BRCA	Used in CUPiD
TCGA-AC-A3EH-01	TCGA	BRCA	Infiltrating Lobular Carcinoma	BRCA	Used in CUPiD
TCGA-AC-A3HN-01	TCGA	BRCA	Infiltrating Lobular Carcinoma	BRCA	Used in CUPiD
TCGA-AC-A3OD-01	TCGA	BRCA	Infiltrating Lobular Carcinoma	BRCA	Used in CUPiD
TCGA-AC-A3QP-01	TCGA	BRCA	Infiltrating Lobular Carcinoma	BRCA	Used in CUPiD
TCGA-AC-A3QQ-01	TCGA	BRCA	Infiltrating Lobular Carcinoma	BRCA	Used in CUPiD
TCGA-AC-A3TM-01	TCGA	BRCA	Infiltrating Lobular Carcinoma	BRCA	Used in CUPiD
TCGA-AC-A3TN-01	TCGA	BRCA	Infiltrating Lobular Carcinoma	BRCA	Used in CUPiD
TCGA-AC-A3W5-01	TCGA	BRCA	Infiltrating Lobular Carcinoma	BRCA	Used in CUPiD
TCGA-AC-A3W6-01	TCGA	BRCA	Infiltrating Lobular Carcinoma	BRCA	Used in CUPiD
TCGA-AC-A3W7-01	TCGA	BRCA	Infiltrating Lobular Carcinoma	BRCA	Used in CUPiD
TCGA-AC-A3YI-01	TCGA	BRCA	Infiltrating Lobular Carcinoma	BRCA	Used in CUPiD
TCGA-AC-A3YJ-01	TCGA	BRCA	Other, specify	BRCA	Used in CUPiD
TCGA-AC-A4ZE-01	TCGA	BRCA	Infiltrating Lobular Carcinoma	BRCA	Used in CUPiD
TCGA-AC-A5EH-01	TCGA	BRCA	Infiltrating Ductal Carcinoma	BRCA	Used in CUPiD
TCGA-AC-A5EI-01	TCGA	BRCA	Other, specify	BRCA	Used in CUPiD
TCGA-AC-A5XS-01	TCGA	BRCA	Infiltrating Lobular Carcinoma	BRCA	Used in CUPiD
TCGA-AC-A5XU-01	TCGA	BRCA	Infiltrating Ductal Carcinoma	BRCA	Used in CUPiD
TCGA-AC-A62V-01	TCGA	BRCA	Infiltrating Ductal Carcinoma	BRCA	Used in CUPiD
TCGA-AC-A62X-01	TCGA	BRCA	Infiltrating Ductal Carcinoma	BRCA	Used in CUPiD
TCGA-AC-A62Y-01	TCGA	BRCA	Infiltrating Lobular Carcinoma	BRCA	Used in CUPiD
TCGA-AC-A6IV-01	TCGA	BRCA	Infiltrating Lobular Carcinoma	BRCA	Used in CUPiD
TCGA-AC-A6IW-01	TCGA	BRCA	Infiltrating Ductal Carcinoma	BRCA	Used in CUPiD
TCGA-AC-A6IX-01	TCGA	BRCA	Infiltrating Lobular Carcinoma	BRCA	Used in CUPiD
TCGA-AC-A6IX-06	TCGA	BRCA	Infiltrating Lobular Carcinoma	NotUsed	Metastatic
TCGA-AC-A6NO-01	TCGA	BRCA	Infiltrating Ductal Carcinoma	BRCA	Used in CUPiD
TCGA-AC-A7VB-01	TCGA	BRCA	Infiltrating Ductal Carcinoma	BRCA	Used in CUPiD
TCGA-AC-A7VC-01	TCGA	BRCA	Metaplastic Carcinoma	BRCA	Used in CUPiD
TCGA-AC-A8OP-01	TCGA	BRCA	Infiltrating Ductal Carcinoma	BRCA	Used in CUPiD
TCGA-AC-A8OQ-01	TCGA	BRCA	Infiltrating Ductal Carcinoma	BRCA	Used in CUPiD
TCGA-AC-A8OR-01	TCGA	BRCA	Mucinous Carcinoma	BRCA	Used in CUPiD
TCGA-AC-A8OS-01	TCGA	BRCA	Infiltrating Lobular Carcinoma	BRCA	Used in CUPiD
TCGA-AD-5900-01	TCGA	COAD	Colon Mucinous Adenocarcinoma	LowerGI	Used in CUPiD
TCGA-AD-6548-01	TCGA	COAD	Colon Adenocarcinoma	LowerGI	Used in CUPiD
TCGA-AD-6888-01	TCGA	COAD	Colon Adenocarcinoma	LowerGI	Used in CUPiD
TCGA-AD-6889-01	TCGA	COAD	Colon Adenocarcinoma	LowerGI	Used in CUPiD
TCGA-AD-6890-01	TCGA	COAD	Colon Adenocarcinoma	LowerGI	Used in CUPiD
TCGA-AD-6895-01	TCGA	COAD	Colon Adenocarcinoma	LowerGI	Used in CUPiD
TCGA-AD-6899-01	TCGA	COAD	Colon Mucinous Adenocarcinoma	LowerGI	Used in CUPiD
TCGA-AD-6901-01	TCGA	COAD	Colon Adenocarcinoma	LowerGI	Used in CUPiD
TCGA-AD-6963-01	TCGA	COAD	Colon Adenocarcinoma	LowerGI	Used in CUPiD
TCGA-AD-6964-01	TCGA	COAD	Colon Adenocarcinoma	LowerGI	Used in CUPiD
TCGA-AD-6965-01	TCGA	COAD	Colon Adenocarcinoma	LowerGI	Used in CUPiD
TCGA-AD-A5EJ-01	TCGA	COAD	Colon Adenocarcinoma	LowerGI	Used in CUPiD
TCGA-AD-A5EK-01	TCGA	COAD	Colon Adenocarcinoma	LowerGI	Used in CUPiD
TCGA-AF-2687-01	TCGA	READ	Rectal Adenocarcinoma	LowerGI	Used in CUPiD
TCGA-AF-2690-01	TCGA	READ	Rectal Adenocarcinoma	LowerGI	Used in CUPiD
TCGA-AF-2693-01	TCGA	READ	NA	LowerGI	Used in CUPiD
TCGA-AF-3911-01	TCGA	READ	Rectal Adenocarcinoma	LowerGI	Used in CUPiD
TCGA-AF-4110-01	TCGA	READ	NA	LowerGI	Used in CUPiD
TCGA-AF-6136-01	TCGA	READ	Rectal Adenocarcinoma	LowerGI	Used in CUPiD
TCGA-AF-6655-01	TCGA	READ	Rectal Adenocarcinoma	LowerGI	Used in CUPiD
TCGA-AF-6672-01	TCGA	READ	Rectal Adenocarcinoma	LowerGI	Used in CUPiD
TCGA-AF-A56K-01	TCGA	READ	Rectal Adenocarcinoma	LowerGI	Used in CUPiD
TCGA-AF-A56L-01	TCGA	READ	Rectal Adenocarcinoma	LowerGI	Used in CUPiD
TCGA-AF-A56N-01	TCGA	READ	Rectal Adenocarcinoma	LowerGI	Used in CUPiD
TCGA-AG-3591-01	TCGA	READ	Rectal Adenocarcinoma	LowerGI	Used in CUPiD
TCGA-AG-3592-01	TCGA	READ	Rectal Adenocarcinoma	LowerGI	Used in CUPiD
TCGA-AG-3725-01	TCGA	READ	Rectal Adenocarcinoma	LowerGI	Used in CUPiD
TCGA-AG-3725-11	TCGA	READ	Rectal Adenocarcinoma	Normal Tissue	Adjacent Normal
TCGA-AG-3731-01	TCGA	READ	Rectal Adenocarcinoma	LowerGI	Used in CUPiD
TCGA-AG-3731-11	TCGA	READ	Rectal Adenocarcinoma	Normal Tissue	Adjacent Normal
TCGA-AG-3732-01	TCGA	READ	Rectal Adenocarcinoma	LowerGI	Used in CUPiD
TCGA-AG-3742-01	TCGA	READ	Rectal Adenocarcinoma	LowerGI	Used in CUPiD
TCGA-AG-4021-01	TCGA	READ	Rectal Adenocarcinoma	LowerGI	Used in CUPiD
TCGA-AG-4022-01	TCGA	READ	Rectal Adenocarcinoma	LowerGI	Used in CUPiD
TCGA-AG-A01W-01	TCGA	READ	Rectal Adenocarcinoma	LowerGI	Used in CUPiD
TCGA-AG-A01W-11	TCGA	READ	Rectal Adenocarcinoma	Normal Tissue	Adjacent Normal
TCGA-AG-A01Y-01	TCGA	READ	Rectal Adenocarcinoma	LowerGI	Used in CUPiD
TCGA-AG-A01Y-11	TCGA	READ	Rectal Adenocarcinoma	Normal Tissue	Adjacent Normal
TCGA-AG-A020-01	TCGA	READ	Rectal Mucinous Adenocarcinoma	LowerGI	Used in CUPiD
TCGA-AG-A020-11	TCGA	READ	Rectal Mucinous Adenocarcinoma	Normal Tissue	Adjacent Normal
TCGA-AG-A026-01	TCGA	READ	Rectal Adenocarcinoma	LowerGI	Used in CUPiD
TCGA-AG-A02N-01	TCGA	READ	Rectal Adenocarcinoma	LowerGI	Used in CUPiD
TCGA-AG-A02N-11	TCGA	READ	Rectal Adenocarcinoma	Normal Tissue	Adjacent Normal
TCGA-AG-A036-01	TCGA	READ	Rectal Adenocarcinoma	LowerGI	Used in CUPiD
TCGA-AG-A036-11	TCGA	READ	Rectal Adenocarcinoma	Normal Tissue	Adjacent Normal
TCGA-AH-6544-01	TCGA	READ	Rectal Adenocarcinoma	LowerGI	Used in CUPiD
TCGA-AH-6547-01	TCGA	READ	Rectal Adenocarcinoma	LowerGI	Used in CUPiD
TCGA-AH-6549-01	TCGA	READ	Rectal Adenocarcinoma	LowerGI	Used in CUPiD
TCGA-AH-6643-01	TCGA	READ	Rectal Adenocarcinoma	LowerGI	Used in CUPiD
TCGA-AH-6644-01	TCGA	READ	Rectal Adenocarcinoma	LowerGI	Used in CUPiD
TCGA-AH-6897-01	TCGA	READ	Rectal Adenocarcinoma	LowerGI	Used in CUPiD
TCGA-AH-6903-01	TCGA	READ	Rectal Mucinous Adenocarcinoma	LowerGI	Used in CUPiD
TCGA-AJ-A23M-01	TCGA	UCEC	Serous endometrial adenocarcinoma	Gynae	Used in CUPiD
TCGA-AJ-A23N-01	TCGA	UCEC	Serous endometrial adenocarcinoma	Gynae	Used in CUPiD
TCGA-AJ-A23O-01	TCGA	UCEC	Endometrioid endometrial adenocarcinoma	Gynae	Used in CUPiD
TCGA-AJ-A2QK-01	TCGA	UCEC	Endometrioid endometrial adenocarcinoma	Gynae	Used in CUPiD
TCGA-AJ-A2QL-01	TCGA	UCEC	Endometrioid endometrial adenocarcinoma	Gynae	Used in CUPiD
TCGA-AJ-A2QL-11	TCGA	UCEC	Endometrioid endometrial adenocarcinoma	Normal Tissue	Adjacent Normal
TCGA-AJ-A2QM-01	TCGA	UCEC	Serous endometrial adenocarcinoma	Gynae	Used in CUPiD
TCGA-AJ-A2QN-01	TCGA	UCEC	Endometrioid endometrial adenocarcinoma	Gynae	Used in CUPiD
TCGA-AJ-A2QO-01	TCGA	UCEC	Endometrioid endometrial adenocarcinoma	Gynae	Used in CUPiD
TCGA-AJ-A3BD-01	TCGA	UCEC	Serous endometrial adenocarcinoma	Gynae	Used in CUPiD
TCGA-AJ-A3BF-01	TCGA	UCEC	Serous endometrial adenocarcinoma	Gynae	Used in CUPiD
TCGA-AJ-A3BG-01	TCGA	UCEC	Mixed serous and endometrioid	Gynae	Used in CUPiD
TCGA-AJ-A3BH-01	TCGA	UCEC	Endometrioid endometrial adenocarcinoma	Gynae	Used in CUPiD
TCGA-AJ-A3BI-01	TCGA	UCEC	Endometrioid endometrial adenocarcinoma	Gynae	Used in CUPiD
TCGA-AJ-A3BK-01	TCGA	UCEC	Endometrioid endometrial adenocarcinoma	Gynae	Used in CUPiD
TCGA-AJ-A3EJ-01	TCGA	UCEC	Mixed serous and endometrioid	Gynae	Used in CUPiD
TCGA-AJ-A3EK-01	TCGA	UCEC	Endometrioid endometrial adenocarcinoma	Gynae	Used in CUPiD
TCGA-AJ-A3EL-01	TCGA	UCEC	Endometrioid endometrial adenocarcinoma	Gynae	Used in CUPiD
TCGA-AJ-A3EM-01	TCGA	UCEC	Endometrioid endometrial adenocarcinoma	Gynae	Used in CUPiD
TCGA-AJ-A3I9-01	TCGA	UCEC	Endometrioid endometrial adenocarcinoma	Gynae	Used in CUPiD
TCGA-AJ-A3IA-01	TCGA	UCEC	Serous endometrial adenocarcinoma	Gynae	Used in CUPiD
TCGA-AJ-A3NC-01	TCGA	UCEC	Endometrioid endometrial adenocarcinoma	Gynae	Used in CUPiD
TCGA-AJ-A3NC-11	TCGA	UCEC	Endometrioid endometrial adenocarcinoma	Normal Tissue	Adjacent Normal
TCGA-AJ-A3NE-01	TCGA	UCEC	Endometrioid endometrial adenocarcinoma	Gynae	Used in CUPiD
TCGA-AJ-A3NE-11	TCGA	UCEC	Endometrioid endometrial adenocarcinoma	Normal Tissue	Adjacent Normal
TCGA-AJ-A3NF-01	TCGA	UCEC	Serous endometrial adenocarcinoma	Gynae	Used in CUPiD
TCGA-AJ-A3NG-01	TCGA	UCEC	Mixed serous and endometrioid	Gynae	Used in CUPiD
TCGA-AJ-A3NH-01	TCGA	UCEC	Serous endometrial adenocarcinoma	Gynae	Used in CUPiD
TCGA-AJ-A3NH-11	TCGA	UCEC	Serous endometrial adenocarcinoma	Normal Tissue	Adjacent Normal
TCGA-AJ-A3OJ-01	TCGA	UCEC	Endometrioid endometrial adenocarcinoma	Gynae	Used in CUPiD
TCGA-AJ-A3OK-01	TCGA	UCEC	Serous endometrial adenocarcinoma	Gynae	Used in CUPiD
TCGA-AJ-A3OL-01	TCGA	UCEC	Endometrioid endometrial adenocarcinoma	Gynae	Used in CUPiD
TCGA-AJ-A3QS-01	TCGA	UCEC	Serous endometrial adenocarcinoma	Gynae	Used in CUPiD
TCGA-AJ-A3TW-01	TCGA	UCEC	Serous endometrial adenocarcinoma	Gynae	Used in CUPiD
TCGA-AJ-A5DV-01	TCGA	UCEC	Endometrioid endometrial adenocarcinoma	Gynae	Used in CUPiD
TCGA-AJ-A5DW-01	TCGA	UCEC	Endometrioid endometrial adenocarcinoma	Gynae	Used in CUPiD
TCGA-AJ-A6NU-01	TCGA	UCEC	Endometrioid endometrial adenocarcinoma	Gynae	Used in CUPiD
TCGA-AJ-A8CT-01	TCGA	UCEC	Endometrioid endometrial adenocarcinoma	Gynae	Used in CUPiD
TCGA-AJ-A8CV-01	TCGA	UCEC	Endometrioid endometrial adenocarcinoma	Gynae	Used in CUPiD
TCGA-AJ-A8CW-01	TCGA	UCEC	Endometrioid endometrial adenocarcinoma	Gynae	Used in CUPiD
TCGA-AK-3428-01	TCGA	KIRC	Kidney Clear Cell Renal Carcinoma	KIRC	Used in CUPiD
TCGA-AK-3431-01	TCGA	KIRC	Kidney Clear Cell Renal Carcinoma	KIRC	Used in CUPiD
TCGA-AK-3433-01	TCGA	KIRC	Kidney Clear Cell Renal Carcinoma	KIRC	Used in CUPiD
TCGA-AK-3434-01	TCGA	KIRC	Kidney Clear Cell Renal Carcinoma	KIRC	Used in CUPiD
TCGA-AK-3440-01	TCGA	KIRC	Kidney Clear Cell Renal Carcinoma	KIRC	Used in CUPiD
TCGA-AK-3445-01	TCGA	KIRC	Kidney Clear Cell Renal Carcinoma	KIRC	Used in CUPiD
TCGA-AK-3450-01	TCGA	KIRC	Kidney Clear Cell Renal Carcinoma	KIRC	Used in CUPiD
TCGA-AK-3453-01	TCGA	KIRC	Kidney Clear Cell Renal Carcinoma	KIRC	Used in CUPiD
TCGA-AK-3454-01	TCGA	KIRC	Kidney Clear Cell Renal Carcinoma	KIRC	Used in CUPiD
TCGA-AK-3458-01	TCGA	KIRC	Kidney Clear Cell Renal Carcinoma	KIRC	Used in CUPiD
TCGA-AK-3460-01	TCGA	KIRC	Kidney Clear Cell Renal Carcinoma	KIRC	Used in CUPiD
TCGA-AK-3461-01	TCGA	KIRC	Kidney Clear Cell Renal Carcinoma	KIRC	Used in CUPiD
TCGA-AL-7173-01	TCGA	KIRP	Kidney Papillary Renal Cell Carcinoma	KIRP	Used in CUPiD
TCGA-AM-5820-01	TCGA	COAD	Colon Adenocarcinoma	LowerGI	Used in CUPiD
TCGA-AM-5821-01	TCGA	COAD	Colon Adenocarcinoma	LowerGI	Used in CUPiD
TCGA-AN-A0XL-01	TCGA	BRCA	Infiltrating Ductal Carcinoma	BRCA	Used in CUPiD
TCGA-AN-A0XN-01	TCGA	BRCA	Infiltrating Ductal Carcinoma	BRCA	Used in CUPiD
TCGA-AN-A0XO-01	TCGA	BRCA	Infiltrating Ductal Carcinoma	BRCA	Used in CUPiD
TCGA-AN-A0XP-01	TCGA	BRCA	Infiltrating Ductal Carcinoma	BRCA	Used in CUPiD
TCGA-AN-A0XR-01	TCGA	BRCA	Infiltrating Ductal Carcinoma	BRCA	Used in CUPiD
TCGA-AN-A0XS-01	TCGA	BRCA	Infiltrating Ductal Carcinoma	BRCA	Used in CUPiD
TCGA-AN-A0XT-01	TCGA	BRCA	Infiltrating Ductal Carcinoma	BRCA	Used in CUPiD
TCGA-AN-A0XU-01	TCGA	BRCA	Infiltrating Ductal Carcinoma	BRCA	Used in CUPiD
TCGA-AN-A0XV-01	TCGA	BRCA	Infiltrating Ductal Carcinoma	BRCA	Used in CUPiD
TCGA-AN-A0XW-01	TCGA	BRCA	Infiltrating Ductal Carcinoma	BRCA	Used in CUPiD
TCGA-AO-A03L-01	TCGA	BRCA	Infiltrating Ductal Carcinoma	BRCA	Used in CUPiD
TCGA-AO-A03M-01	TCGA	BRCA	Infiltrating Ductal Carcinoma	BRCA	Used in CUPiD
TCGA-AO-A03N-01	TCGA	BRCA	Infiltrating Ductal Carcinoma	BRCA	Used in CUPiD
TCGA-AO-A03U-01	TCGA	BRCA	Other, specify	BRCA	Used in CUPiD
TCGA-AO-A0JA-01	TCGA	BRCA	Infiltrating Ductal Carcinoma	BRCA	Used in CUPiD
TCGA-AO-A0JB-01	TCGA	BRCA	Infiltrating Ductal Carcinoma	BRCA	Used in CUPiD
TCGA-AO-A0JC-01	TCGA	BRCA	Infiltrating Ductal Carcinoma	BRCA	Used in CUPiD
TCGA-AO-A0JD-01	TCGA	BRCA	Infiltrating Ductal Carcinoma	BRCA	Used in CUPiD
TCGA-AO-A0JE-01	TCGA	BRCA	Infiltrating Ductal Carcinoma	BRCA	Used in CUPiD
TCGA-AO-A0JF-01	TCGA	BRCA	Infiltrating Ductal Carcinoma	BRCA	Used in CUPiD
TCGA-AO-A0JG-01	TCGA	BRCA	Other, specify	BRCA	Used in CUPiD
TCGA-AO-A0JI-01	TCGA	BRCA	Infiltrating Ductal Carcinoma	BRCA	Used in CUPiD
TCGA-AO-A0JJ-01	TCGA	BRCA	Infiltrating Lobular Carcinoma	BRCA	Used in CUPiD
TCGA-AO-A0JL-01	TCGA	BRCA	Infiltrating Ductal Carcinoma	BRCA	Used in CUPiD
TCGA-AO-A0JM-01	TCGA	BRCA	Infiltrating Ductal Carcinoma	BRCA	Used in CUPiD
TCGA-AO-A124-01	TCGA	BRCA	Other, specify	BRCA	Used in CUPiD
TCGA-AO-A125-01	TCGA	BRCA	Other, specify	BRCA	Used in CUPiD
TCGA-AO-A126-01	TCGA	BRCA	Infiltrating Ductal Carcinoma	BRCA	Used in CUPiD
TCGA-AO-A128-01	TCGA	BRCA	Infiltrating Ductal Carcinoma	BRCA	Used in CUPiD
TCGA-AO-A129-01	TCGA	BRCA	Infiltrating Ductal Carcinoma	BRCA	Used in CUPiD
TCGA-AO-A12B-01	TCGA	BRCA	Infiltrating Ductal Carcinoma	BRCA	Used in CUPiD
TCGA-AO-A12C-01	TCGA	BRCA	Infiltrating Ductal Carcinoma	BRCA	Used in CUPiD
TCGA-AO-A12E-01	TCGA	BRCA	Infiltrating Lobular Carcinoma	BRCA	Used in CUPiD
TCGA-AO-A12G-01	TCGA	BRCA	Other, specify	BRCA	Used in CUPiD
TCGA-AO-A1KO-01	TCGA	BRCA	Infiltrating Lobular Carcinoma	BRCA	Used in CUPiD
TCGA-AO-A1KP-01	TCGA	BRCA	Infiltrating Ductal Carcinoma	BRCA	Used in CUPiD
[truncated: 7,861 more rows]
