# Supplementary material for: CUPiD: A cfDNA methylation-based tissue-of-origin classifier for Cancers of Unknown Primary
Source: Research Square preprint supplement (doi:10.21203/rs.3.rs-3758456/v1), 2023-12-26
Supplement: Supplementary file 4 [file 23f18f4f90d5eeaa58d18f07.xlsx]

## Sheet: Validation_summary
Supplementary Table 4: CUPiD predictions for the independent test cohort, mean values across the 100 sub-classifiers
Sample Name	Correct Class	CUPiD prediction	Highest Predicted Class	Prediction score value for Highest Predicted Class	Second Highest Predicted Class	Prediction score value for Second Highest Predicted Class	CUPiD Concordance	Estimated tumour fraction from ichorCNA
TAR00019	ACC	ACC	ACC	0.881896	SKCM	0.0495454	Correct	0.03155
TAR00098	ACC	ACC	ACC	0.934238	LUAD	0.0187497	Correct	0.01934
TAR00253	ACC	Unclassified	UpperGI	0.25772	KIRC	0.147276	Unclassified	0.01013
TAR00476	ACC	Unclassified	NCC	0.961914	LUAD	0.00476469	Unclassified	0.003797
TAR00495	ACC	ACC	ACC	0.997395	UpperSq	0.00155225	Correct	0.007685
TAR00198	BLCA	BLCA	BLCA	0.99187	UpperSq	0.00412943	Correct	0.04546
TAR00305	BLCA	BLCA	BLCA	0.999998	LUSC	8.03452e-07	Correct	0.3047
TAR00359	BLCA	BLCA	BLCA	0.999327	Gynae	0.000291485	Correct	0.007147
TAR00396	BLCA	BLCA	BLCA	0.99996	Gynae	1.64948e-05	Correct	0.04183
TAR00408	BLCA	BLCA	BLCA	0.855497	LUAD	0.037291	Correct	0.01045
TAR00442	BLCA	BLCA	BLCA	0.999987	Gynae	8.15898e-06	Correct	0.04152
TAR00472	BLCA	BLCA	BLCA	0.999994	LUSC	1.72883e-06	Correct	0.03399
TAR00074	BRCA	BRCA	BRCA	0.874643	LUSC	0.0674424	Correct	0.269
TAR00104	BRCA	BRCA	BRCA	0.998947	LUSC	0.000535392	Correct	0.1144
TAR00108	BRCA	BRCA	BRCA	0.999653	PRAD	0.000144953	Correct	0.1039
TAR00115	BRCA	BRCA	BRCA	0.984857	LUSC	0.0113785	Correct	0.4541
TAR00167	BRCA	BRCA	BRCA	0.999969	LUSC	1.40163e-05	Correct	0.4407
TAR00201	BRCA	BRCA	BRCA	0.981951	LUSC	0.0172538	Correct	0.3699
TAR00213	BRCA	BRCA	BRCA	0.999712	Gynae	0.000131155	Correct	0.1233
TAR00232	BRCA	BRCA	BRCA	0.999938	LUSC	4.84751e-05	Correct	0.3178
TAR00256	BRCA	BRCA	BRCA	0.997228	LUAD	0.0014534	Correct	0.1423
TAR00262	BRCA	Unclassified	BRCA	0.447227	LUSC	0.252471	Unclassified	0.01204
TAR00298	BRCA	BRCA	BRCA	0.999666	LUSC	0.000207218	Correct	0.01024
TAR00330	BRCA	BRCA	BRCA	0.991796	UpperSq	0.00508906	Correct	0.3304
TAR00341	BRCA	Unclassified	BRCA	0.497007	LUSC	0.186637	Unclassified	0.01471
TAR00353	BRCA	BRCA	BRCA	0.991136	LUSC	0.00677632	Correct	0.1159
TAR00357	BRCA	BRCA	BRCA	0.996275	UpperSq	0.00159963	Correct	0.00484
TAR00386	BRCA	BRCA	BRCA	0.500446	NCC	0.139317	Correct	0.01396
TAR00391	BRCA	Unclassified	LowerGI	0.269016	LIHC	0.156743	Unclassified	0.003488
TAR00429	BRCA	BRCA	BRCA	0.998513	Gynae	0.000863154	Correct	0.08095
TAR00430	BRCA	BRCA	BRCA	0.997009	LUSC	0.00206924	Correct	0.04357
TAR00462	BRCA	BRCA	BRCA	0.944412	CervSq	0.0369302	Correct	0.3266
TAR00479	BRCA	BRCA	BRCA	0.898931	PRAD	0.0317631	Correct	0.04659
TAR00484	BRCA	Unclassified	NCC	0.694233	LUSC	0.0414387	Unclassified	0.00564
TAR00020	CervSq	CervSq	CervSq	0.995262	UpperSq	0.00412006	Correct	0.09557
TAR00131	CervSq	CervSq	CervSq	0.996009	UpperSq	0.00231236	Correct	0.02251
TAR00149	CervSq	CervSq	CervSq	0.96113	BLCA	0.0131461	Correct	0.01043
TAR00363	CervSq	CervSq	CervSq	0.979676	BLCA	0.013485	Correct	0.02253
TAR00404	CervSq	CervSq	CervSq	0.999376	Gynae	0.000278785	Correct	0.02382
TAR00410	CervSq	CervSq	CervSq	0.998737	UpperSq	0.00074748	Correct	0.02882
TAR00423	CervSq	CervSq	CervSq	0.999999	UpperSq	4.0839e-07	Correct	0.6056
TAR00478	CervSq	Unclassified	CervSq	0.337122	UpperSq	0.271169	Unclassified	0.007245
TAR00504	CervSq	Unclassified	CervSq	0.266205	UpperSq	0.2088	Unclassified	0.01151
TAR00073	CHOL	CHOL	CHOL	0.987158	LIHC	0.00765954	Correct	0.4024
TAR00097	CHOL	CHOL	CHOL	0.99232	PAAD	0.00175292	Correct	0.02402
TAR00248	CHOL	PAAD	PAAD	0.975772	BLCA	0.0116108	Wrong	0.14
TAR00289	CHOL	CHOL	CHOL	0.933589	LIHC	0.0289037	Correct	0.01789
TAR00311	CHOL	CHOL	CHOL	0.723362	PAAD	0.0855491	Correct	0.01058
TAR00371	CHOL	Unclassified	LIHC	0.436124	NCC	0.352038	Unclassified	0.01767
TAR00491	CHOL	Unclassified	NCC	0.267809	LUSC	0.241726	Unclassified	0.005566
TAR00492	CHOL	Unclassified	CHOL	0.328518	LIHC	0.22843	Unclassified	0.009881
TAR00512	CHOL	Unclassified	LUAD	0.199002	LIHC	0.132877	Unclassified	0.006227
TAR00154	Gynae	Gynae	Gynae	0.81585	KIRP	0.0542988	Correct	0.03467
TAR00160	Gynae	Gynae	Gynae	0.999662	BRCA	0.000183393	Correct	0.2947
TAR00161	Gynae	Gynae	Gynae	0.982304	LUSC	0.0126555	Correct	0.02647
TAR00181	Gynae	Gynae	Gynae	0.880375	LUSC	0.0504027	Correct	0.01632
TAR00215	Gynae	Gynae	Gynae	0.964185	CervSq	0.0152404	Correct	0.06048
TAR00247	Gynae	Gynae	Gynae	0.995837	LUSC	0.0017258	Correct	0.1139
TAR00296	Gynae	Gynae	Gynae	0.506775	CervSq	0.444522	Correct	0.0137
TAR00420	Gynae	Gynae	Gynae	0.987497	KIRP	0.00581372	Correct	0.206
TAR00467	Gynae	Unclassified	BLCA	0.3496	Gynae	0.313037	Unclassified	0.1214
TAR00014	KIRC	Unclassified	NCC	0.293697	LUSC	0.0944863	Unclassified	0.009552
TAR00128	KIRC	KIRC	KIRC	0.991258	KIRP	0.00446911	Correct	0.01819
TAR00392	KIRC	Unclassified	KIRC	0.459237	KIRP	0.180957	Unclassified	0.0199
TAR00399	KIRC	KIRC	KIRC	0.929871	KIRP	0.0486833	Correct	0.009813
TAR00451	KIRC	KIRC	KIRC	0.936375	Gynae	0.0167488	Correct	0.01745
TAR00229	LIHC	LIHC	LIHC	0.999768	CHOL	0.000203095	Correct	0.01394
TAR00036	LowerGI	LowerGI	LowerGI	0.999656	UpperGI	0.000181298	Correct	0.2287
TAR00087	LowerGI	LowerGI	LowerGI	0.999999	BLCA	5.15316e-07	Correct	0.129
TAR00111	LowerGI	LowerGI	LowerGI	0.999994	Gynae	2.38455e-06	Correct	0.3013
TAR00113	LowerGI	LowerGI	LowerGI	0.999987	Gynae	5.26738e-06	Correct	0.2731
TAR00139	LowerGI	LowerGI	LowerGI	0.893416	UpperGI	0.0684074	Correct	0.1505
TAR00158	LowerGI	LowerGI	LowerGI	0.999929	UpperGI	5.49015e-05	Correct	0.1552
TAR00159	LowerGI	LowerGI	LowerGI	0.999789	UpperGI	0.000170237	Correct	0.2398
TAR00170	LowerGI	LowerGI	LowerGI	0.619592	UpperGI	0.223172	Correct	0.08014
TAR00171	LowerGI	LowerGI	LowerGI	1	Gynae	5.05503e-08	Correct	0.1543
TAR00177	LowerGI	LowerGI	LowerGI	0.999623	BLCA	0.000248871	Correct	0.2894
TAR00184	LowerGI	LowerGI	LowerGI	0.999997	Gynae	9.06931e-07	Correct	0.2455
TAR00185	LowerGI	LowerGI	LowerGI	0.999602	UpperGI	0.000228789	Correct	0.1912
TAR00189	LowerGI	LowerGI	LowerGI	0.999123	UpperGI	0.00076196	Correct	0.2429
TAR00194	LowerGI	LowerGI	LowerGI	0.620681	LIHC	0.0724745	Correct	0.01632
TAR00196	LowerGI	LowerGI	LowerGI	0.99997	Gynae	1.49234e-05	Correct	0.2496
TAR00206	LowerGI	LowerGI	LowerGI	0.631089	UpperGI	0.283599	Correct	0.3433
TAR00207	LowerGI	LowerGI	LowerGI	0.999988	UpperGI	8.87956e-06	Correct	0.338
TAR00216	LowerGI	LowerGI	LowerGI	0.998665	UpperGI	0.00075068	Correct	0.2639
TAR00219	LowerGI	LowerGI	LowerGI	0.999709	UpperGI	0.000115223	Correct	0.09969
TAR00223	LowerGI	LowerGI	LowerGI	0.999999	CervSq	1.79378e-07	Correct	0.2288
TAR00241	LowerGI	LowerGI	LowerGI	0.999991	BLCA	4.42179e-06	Correct	0.1807
TAR00250	LowerGI	LowerGI	LowerGI	0.999958	UpperGI	2.79486e-05	Correct	0.4093
TAR00254	LowerGI	LowerGI	LowerGI	0.999992	Gynae	3.55217e-06	Correct	0.2242
TAR00300	LowerGI	LowerGI	LowerGI	0.999424	Gynae	0.000316455	Correct	0.3326
TAR00310	LowerGI	LowerGI	LowerGI	0.998112	UpperGI	0.0014493	Correct	0.2301
TAR00319	LowerGI	LowerGI	LowerGI	0.999234	UpperGI	0.000296034	Correct	0.2502
TAR00323	LowerGI	LowerGI	LowerGI	0.999993	BLCA	2.69612e-06	Correct	0.06815
TAR00327	LowerGI	LowerGI	LowerGI	0.999999	Gynae	3.38298e-07	Correct	0.1353
TAR00365	LowerGI	LowerGI	LowerGI	0.999997	Gynae	1.24565e-06	Correct	0.1243
TAR00370	LowerGI	LowerGI	LowerGI	0.999822	Gynae	0.000101045	Correct	0.2567
TAR00373	LowerGI	LowerGI	LowerGI	1	Gynae	4.79552e-08	Correct	0.3059
TAR00418	LowerGI	LowerGI	LowerGI	0.999218	UpperGI	0.000530992	Correct	0.365
TAR00428	LowerGI	LowerGI	LowerGI	0.946792	UpperGI	0.0530708	Correct	0.06008
TAR00443	LowerGI	LowerGI	LowerGI	0.999999	Gynae	4.00525e-07	Correct	0.3436
TAR00012	LUAD	BRCA	BRCA	0.849702	LUSC	0.122199	Wrong	0.349
TAR00059	LUAD	LUAD	LUAD	0.996165	LUSC	0.00332361	Correct	0.04108
TAR00072	LUAD	LUSC	LUSC	0.58586	LUAD	0.413517	Wrong	0.05434
TAR00078	LUAD	LUAD	LUAD	0.997083	LUSC	0.00286895	Correct	0.01769
TAR00101	LUAD	LUAD	LUAD	0.999747	LUSC	0.000223172	Correct	0.08426
TAR00110	LUAD	Unclassified	UpperGI	0.372873	PAAD	0.276139	Unclassified	0.01926
TAR00174	LUAD	LUAD	LUAD	0.739084	LUSC	0.25597	Correct	0.2657
TAR00188	LUAD	LUAD	LUAD	0.994173	LUSC	0.00500707	Correct	0.007096
TAR00278	LUAD	LUAD	LUAD	0.999888	LUSC	0.000110935	Correct	0.05634
TAR00280	LUAD	LUAD	LUAD	0.999835	LUSC	9.39258e-05	Correct	0.02149
TAR00283	LUAD	LUAD	LUAD	0.999928	LUSC	6.22227e-05	Correct	0.194
TAR00331	LUAD	LUAD	LUAD	0.998948	LUSC	0.00094503	Correct	0.02186
TAR00338	LUAD	LUSC	LUSC	0.592955	LUAD	0.248359	Wrong	0.02706
TAR00354	LUAD	LUAD	LUAD	0.99998	LUSC	1.88418e-05	Correct	0.1506
TAR00362	LUAD	LUAD	LUAD	0.74984	LUSC	0.118053	Correct	0.1897
TAR00412	LUAD	LUAD	LUAD	0.998588	LUSC	0.0013371	Correct	0.2467
TAR00419	LUAD	LUAD	LUAD	0.999887	LUSC	5.91528e-05	Correct	0.03203
TAR00422	LUAD	LUAD	LUAD	0.824601	BRCA	0.0833523	Correct	0.2804
TAR00466	LUAD	LUAD	LUAD	0.999941	LUSC	2.39262e-05	Correct	0.03296
TAR00468	LUAD	LUAD	LUAD	0.758746	LUSC	0.175	Correct	0.07778
TAR00469	LUAD	LUAD	LUAD	0.515076	BRCA	0.199921	Correct	0.006247
TAR00517	LUAD	LUAD	LUAD	0.997593	LUSC	0.00224155	Correct	0.1042
TAR00518	LUAD	LUAD	LUAD	0.7854	PAAD	0.0837899	Correct	0
TAR00030	LUSC	LUSC	LUSC	0.9999	UpperSq	9.83404e-05	Correct	0.113
TAR00164	LUSC	LUSC	LUSC	0.978542	UpperSq	0.0214295	Correct	0.1148
TAR00168	LUSC	LUSC	LUSC	0.994258	SARC	0.00313505	Correct	0.02669
TAR00220	LUSC	LUSC	LUSC	0.990138	UpperSq	0.00977746	Correct	0.272
TAR00279	LUSC	Unclassified	LUSC	0.449445	Gynae	0.188929	Unclassified	0.1923
TAR00112	UpperGI	UpperGI	UpperGI	0.96702	LowerGI	0.00832662	Correct	0.01316
TAR00130	UpperGI	UpperGI	UpperGI	0.994577	CHOL	0.0029737	Correct	0.01927
TAR00133	UpperGI	UpperGI	UpperGI	0.982489	LowerGI	0.00793837	Correct	0.06793
TAR00203	UpperGI	UpperGI	UpperGI	0.677094	BLCA	0.0811906	Correct	0.01525
TAR00264	UpperGI	UpperGI	UpperGI	0.542956	BLCA	0.205678	Correct	0.2385
TAR00382	UpperGI	UpperGI	UpperGI	0.967028	BLCA	0.0185064	Correct	0.1008
TAR00389	UpperGI	UpperGI	UpperGI	0.945044	LowerGI	0.0234445	Correct	0.0143
TAR00407	UpperGI	UpperGI	UpperGI	0.971997	CHOL	0.0210299	Correct	0.1007
TAR00431	UpperGI	UpperGI	UpperGI	0.9998	LowerGI	9.67889e-05	Correct	0.1333
TAR00440	UpperGI	UpperGI	UpperGI	0.981373	PAAD	0.00838096	Correct	0.01853
TAR00480	UpperGI	UpperGI	UpperGI	0.995899	PAAD	0.0025537	Correct	0.003361
TAR00513	UpperGI	Unclassified	UpperGI	0.307029	LUAD	0.150313	Unclassified	0.007211
TAR00277	UpperSq	UpperSq	UpperSq	0.973436	CervSq	0.0224975	Correct	0.05206
NCC0080	NCC	Unclassified	NCC	0.827845	BRCA	0.0206203	Unclassified	0.004185
NCC0081	NCC	Unclassified	NCC	0.889924	PCPG	0.016705	Unclassified	0.004915
NCC0082	NCC	Unclassified	NCC	0.771199	LIHC	0.0285701	Unclassified	0.009714
NCC0083	NCC	Unclassified	NCC	0.734319	TGCT	0.111042	Unclassified	0.002927
NCC0084	NCC	Unclassified	NCC	0.966444	CHOL	0.00417958	Unclassified	0.009185
NCC0085	NCC	Unclassified	NCC	0.509568	LUAD	0.0935168	Unclassified	0.01408
NCC0086	NCC	Unclassified	BLCA	0.189574	PRAD	0.132331	Unclassified	0.01205
NCC0087	NCC	Unclassified	NCC	0.683113	LAML	0.0600855	Unclassified	0.01423
NCC0088	NCC	Unclassified	NCC	0.894489	LUAD	0.0142198	Unclassified	0.006813
NCC0089	NCC	Unclassified	UpperGI	0.205574	NCC	0.110654	Unclassified	0.006528
NCC0090	NCC	Unclassified	LowerGI	0.136158	UpperGI	0.105563	Unclassified	0.004273
NCC0091	NCC	Unclassified	LUAD	0.124252	NCC	0.122026	Unclassified	0.007991
NCC0092	NCC	Unclassified	UpperGI	0.155638	PRAD	0.138028	Unclassified	0.005311
NCC0093	NCC	Unclassified	LUAD	0.254765	KIRC	0.135435	Unclassified	0.00241
NCC0094	NCC	Unclassified	LUAD	0.12148	PRAD	0.112402	Unclassified	0.01025
NCC0095	NCC	Unclassified	CHOL	0.148508	LUSC	0.137881	Unclassified	0.005224
NCC0096	NCC	Unclassified	NCC	0.331959	CervSq	0.186184	Unclassified	0.01044
NCC0097	NCC	Unclassified	NCC	0.357759	LAML	0.110585	Unclassified	0.009719
NCC0098	NCC	Unclassified	NCC	0.806471	LIHC	0.149439	Unclassified	0.006147
NCC0099	NCC	Unclassified	NCC	0.430181	LGG	0.072295	Unclassified	0.01162
NCC0100	NCC	Unclassified	CHOL	0.129316	SKCM	0.101582	Unclassified	0.004962
NCC0101	NCC	Unclassified	NCC	0.952266	PAAD	0.0137909	Unclassified	0.005901
NCC0102	NCC	Unclassified	NCC	0.99731	LIHC	0.000576949	Unclassified	0.007339
NCC0103	NCC	Unclassified	LUAD	0.160852	PRAD	0.0925062	Unclassified	0.009337
NCC0104	NCC	Unclassified	UpperGI	0.198689	BLCA	0.12367	Unclassified	0.005125
NCC0105	NCC	Unclassified	NCC	0.801513	LIHC	0.197815	Unclassified	0.005075
