# Supplementary material for: CUPiD: A cfDNA methylation-based tissue-of-origin classifier for Cancers of Unknown Primary
Source: Research Square preprint supplement (doi:10.21203/rs.3.rs-3758456/v1), 2023-12-26
Supplement: Supplementary file 5 [file 826378ae4e165096756d382f.xlsx]

## Sheet: Mutation_stats
Supplementary Table 6: Sequencing statistics for cfDNA and gDNA targeted mutation sequencing for the CUP cohort
ID	Total reads	Mapped reads	% Mapped reads	Unique reads	% uniquely mapped reads	Duplicated reads	Duplication rate	Prededup on target	% on-target reads	Prededup mean coverage	Median fragment size	Postdedup unique reads	Postdedup on target	% on-target reads post dedup	Postdedup mean coverage	Input DNA Amount
TAR00007_gDNA	109187540	106730129	97.7494	97225945	89.0449	29696166	30.5435	38547575	39.6474	1650.48	175	67529779	15187281	22.4898	620.55	25
TAR00007_cfDNA	132056768	114707407	86.8622	103115006	78.0838	33213152	32.2098	37781986	36.6406	1658.04	162	69901854	12731918	18.214	526.59	2.97395
TAR00013_gDNA	93380696	91491856	97.9773	84320503	90.2976	20783960	24.6488	23160113	27.4668	979.1	217	63536543	8053970	12.6761	325.64	25
TAR00013_cfDNA	98540710	87111741	88.4018	80305030	81.4943	10331966	12.8659	20623022	25.6809	913.83	163	69973064	14412671	20.5975	625.88	7.6208
TAR00043_gDNA	127115910	124501734	97.9435	109714336	86.3105	48998182	44.6598	75696948	68.9946	3243.38	221	60716154	35460196	58.4032	1462.81	25
TAR00043_cfDNA	106536366	95527484	89.6666	84408082	79.2294	38594494	45.7237	60565788	71.7535	2661.3	167	45813588	28555963	62.3308	1204.59	25
TAR00057_gDNA	140369694	137240515	97.7708	121195424	86.3402	69020040	56.9494	81965267	67.6307	3533.65	198	52175384	24282729	46.5406	989.91	25
TAR00057_cfDNA	96861054	91577285	94.545	82438413	85.11	49446532	59.98	53289680	64.6418	2307.37	177	32991881	12810764	38.8301	519.16	8.34139
TAR00062_gDNA	132954878	130453068	98.1183	113679198	85.5021	64690676	56.9063	82377089	72.4645	3631.96	187	48988522	28342923	57.8563	1176.33	25
TAR00062_cfDNA	118626320	110635774	93.2641	95665182	80.6441	41693932	43.5832	68215290	71.3063	3058.5	162	53971250	35718811	66.1812	1556.7	25
TAR00068_gDNA	114055580	111745310	97.9744	96972493	85.0221	59611824	61.4729	69319556	71.4837	2986.93	213	37360669	19881913	53.2162	812.38	25
TAR00068_cfDNA	93488180	78960902	84.4608	68285479	73.0418	37332254	54.6709	49858979	73.0155	2227.98	166	30953225	18946864	61.2113	803.07	10.9006
TAR00069_gDNA	133000656	130289902	82.6199	114590975	72.0912	89251874	77.8874	82626889	72.1059	3599.04	186	25339101	8077225	31.8765	327.81	25
TAR00069_cfDNA	105260238	92994306	82.6199	81937863	72.0912	53469790	65.2565	60248613	73.5296	2695.19	162	28468073	15065403	52.9203	624.66	25
TAR00070_gDNA	124244214	121778644	82.6199	104942145	72.0912	80224196	76.4461	77744503	74.0832	3387.62	187	24717949	10158660	41.0983	411.33	25
TAR00070_cfDNA	108847436	89929658	82.6199	78469385	72.0912	57693366	73.5234	56886047	72.4946	2534.91	167	20776019	8574063	41.269	348.54	25
TAR00071_gDNA	116662572	114229490	97.9144	99038973	84.8935	83185034	83.9922	71976363	72.6748	3120.34	217	15853939	4170035	26.3028	169.17	25
TAR00071_cfDNA	107731088	91843788	85.2528	80126080	74.376	72494312	90.4753	58752195	73.3247	2602.11	165	7631768	1671599	21.9032	72.05	8.87744
TAR00080_gDNA	167425918	164416323	98.2024	144078020	86.0548	85314228	59.2139	102060839	70.8372	4432.31	201	58763792	30955447	52.6778	1262.92	25
TAR00080_cfDNA	146284606	125070645	85.4982	109114652	74.5907	71499768	65.5272	78741111	72.1636	3507.93	163	37614884	19623597	52.1698	809.81	6.91
TAR00094_gDNA	121201286	119420292	98.5305	104001820	85.8092	69731200	67.0481	74492866	71.6265	3240.91	191	34270620	16034220	46.7871	647.82	25
TAR00094_cfDNA	95895874	80076711	83.5038	70743568	73.7712	54499314	77.0378	49179945	69.5186	2180.62	168	16244254	4108994	25.2951	159.78	9.32
TAR00122_gDNA	95797362	94804614	98.9637	87017214	90.8347	20207476	23.2224	19631139	22.5601	852.6	156	66809738	5835138	8.73396	237.03	25
TAR00122_cfDNA	94743760	83407291	88.0346	77621970	81.9283	18373202	23.6701	15081762	19.4298	667.17	167	59248768	3329138	5.61892	134.19	6.98244
TAR00169_gDNA	130732804	129330901	98.9277	119443756	91.3648	47741418	39.9698	29459167	24.6636	1296.85	165	71702338	954335	1.33097	36.54	25
TAR00169_cfDNA	128872980	122173765	94.8017	110967883	86.1064	50753768	45.7373	25300464	22.7998	1144.92	162	60214115	412565	0.685163	15.64	25
TAR00182_gDNA	129249778	127607722	98.7295	114019062	88.2161	60793380	53.3186	47677495	41.8154	2123.95	169	53225682	1860775	3.49601	72.71	25
TAR00182_cfDNA	118764052	100747641	84.8301	90687456	76.3593	28178162	31.0717	31618644	34.8655	1423.42	166	62509294	12953817	20.723	555.11	17.1094
TAR00238_gDNA	105662488	104398057	98.8033	94877533	89.793	19824680	20.895	38331284	40.4008	1671.97	160	75052853	24915999	33.1979	1058.25	25
TAR00238_cfDNA	97383774	85069135	87.3545	77950951	80.0451	14756206	18.9301	26381373	33.8436	1182.65	166	63194745	17995139	28.4757	792.25	25
TAR00242_gDNA	76131458	75151166	98.7124	68263404	89.6652	12612926	18.4768	24649942	36.11	1075.18	153	55650478	16267512	29.2316	691.62	25
TAR00242_cfDNA	69832874	64439004	92.276	59019521	84.5154	14212522	24.0811	18778426	31.8173	837.9	164	44806999	9378672	20.9313	402.49	6.221
TAR00243_gDNA	95940670	94695160	98.7018	85830522	89.4621	16066738	18.7191	27684034	32.2543	1204.62	166	69763784	17912192	25.6755	760.3	25
TAR00243_cfDNA	86574174	80556738	93.0494	73673402	85.0986	12915950	17.5314	21451429	29.1169	960.72	163	60757452	14690516	24.179	646.22	25
TAR00272_gDNA	98451478	96058073	97.5689	88046809	89.4317	20080762	22.8069	34350915	39.0144	1461.64	165	67966047	21262865	31.2845	878.12	25
TAR00272_cfDNA	110211692	97638020	88.5913	89383674	81.1018	17598494	19.6887	30806760	34.4658	1375.34	163	71785180	21619019	30.1163	950.43	15.742
TAR00288_gDNA	47403104	46736534	98.5938	44661913	94.2173	9346838	20.928	17271394	38.6714	722.29	155	35315075	10334004	29.2623	416.63	25
TAR00288_cfDNA	65742742	60967709	92.7368	58541273	89.046	13402326	22.8938	21447998	36.6374	961.95	168	45138947	11842893	26.2365	513.47	18.7085
TAR00326_gDNA	95259970	93989655	98.6665	88472595	92.8749	25620258	28.9584	20437596	23.1005	899.37	153	62852337	13178537	20.9675	573.43	25
TAR00326_cfDNA	99709916	90651899	90.9156	86138675	86.3893	28646882	33.2567	21828635	25.3413	1019.99	164	57491793	13036939	22.6762	603.62	25
TAR00328_gDNA	111599068	110181168	98.7295	104342212	93.4974	46142016	44.2218	31684610	30.3661	1378.41	145	58200196	15590866	26.7883	664.94	25
TAR00328_cfDNA	126528244	116126077	91.7788	110972018	87.7053	55250140	49.7875	38288945	34.5032	1788.43	163	55721878	16780728	30.1152	773.88	25
TAR00384_gDNA	67927386	67367025	99.1751	64390354	94.7929	40558606	62.9886	59611391	92.5781	2598.71	168	23831748	21514045	90.2747	901.74	25
TAR00384_cfDNA	81872470	70005062	85.505	66921292	81.7385	46082766	68.8611	62169645	92.8996	2876.05	167	20838526	18863293	90.5212	844.95	25
TAR00414_gDNA	118807392	116609304	98.1499	111912598	94.1967	80890390	72.28	89697795	80.1499	3905.01	183	31022208	22485524	72.482	943.61	25
TAR00414_cfDNA	116909348	100893050	86.3002	96867389	82.8568	72994318	75.3549	77922167	80.4421	3624.08	169	23873071	17132053	71.7631	771.92	13.0947
TAR00446_cfDNA	70513310	60836602	86.2768	58445052	82.8851	34386140	58.835	50146909	85.8018	2314.29	166	24058912	19860676	82.5502	899.41	25
TAR00446_gDNA	54903080	53667190	97.749	51618220	94.017	30629214	59.338	44110732	85.4557	1916.97	175	20989006	16932393	80.6727	712.14	25
TAR00457_gDNA	70357450	68865192	97.879	65917451	93.6894	42161964	63.9618	52171183	79.1462	2254.79	164	23755487	17261165	72.6618	718.86	25
TAR00457_cfDNA	101817928	90028324	88.4209	86267397	84.7271	56236644	65.1888	70061867	81.2148	3214.89	166	30030753	23070247	76.8221	1035.34	25
TAR00473_gDNA	39366974	39063192	99.2283	37583934	95.4707	26164866	69.6172	32582471	86.6926	1387.22	243	11419068	9300282	81.4452	381.36	25
TAR00473_cfDNA	93963500	81298422	86.5213	77953479	82.9614	56471076	72.442	71076096	91.1776	3283.29	168	21482403	18917970	88.0626	847.63	14.6248
TAR00507_gDNA	60549996	59986416	99.0692	57803479	95.4641	41003610	70.9362	51465610	89.0355	2215.89	197	16799869	13908025	82.7865	569.57	25
TAR00507_cfDNA	99282138	90277744	90.9305	86645903	87.2724	58517796	67.5367	78715758	90.8476	3601.97	158	28128107	24715020	87.8659	1099.46	25
TAR00509_gDNA	76870134	75930776	98.778	72705599	94.5824	41465254	57.0317	57094910	78.5289	2457.81	160	31240345	22739675	72.7894	949.88	25
TAR00509_cfDNA	75109562	68655720	91.4074	65883033	87.7159	39780256	60.3801	52827083	80.1831	2396.02	172	26102777	19689738	75.4316	872.74	25
C006272_cfDNA	59515180	58047374	97.5337	55085731	92.5574	48617458	88.2578	43704504	79.3391	2007.31	165	6468273	1038035	16.0481	41.64	0.93
C006272_gDNA	39396716	38998350	98.9888	37009700	93.9411	20735140	56.0262	27984051	75.6127	1208.5	176	16274560	11101911	68.2164	464.5	25
C006292_cfDNA	117353360	114058692	97.1925	108683797	92.6124	77282552	71.1077	98391746	90.5303	4506.98	153	31401245	27639932	88.0218	1237.5	25
C006292_gDNA	74385578	74193886	99.7423	70646014	94.9727	51752016	73.2554	63603364	90.0311	2690.61	146	18893998	16137463	85.4105	662.48	25
C006407_cfDNA	76911478	76280900	99.1801	72468778	94.2236	52121124	71.9222	63154022	87.1465	2850.57	151	20347654	16213639	79.6831	718.2	25
C006407_gDNA	70699404	70531314	99.7622	66624121	94.2358	46018784	69.0723	56344621	84.5709	2306.62	132	20605337	15787625	76.6191	633.52	25
C006462_cfDNA	74964618	74269406	99.0726	70863853	94.5297	50879846	71.7994	63486913	89.59	2827.52	149	19984007	17503108	87.5856	765.68	25
C006462_gDNA	85447562	85255216	99.7749	80807674	94.5699	64081098	79.3008	71534605	88.5245	2929.02	133	16726576	13740950	82.1504	540.4	25
C008056_cfDNA	123039026	122369822	99.4561	116303807	94.5259	89643222	77.0768	96468043	82.9449	4337.53	152	26660585	18898546	70.8857	817.36	10
C008056_gDNA	44671848	44227566	99.0055	41756153	93.4731	19440914	46.5582	18204472	43.5971	782.81	207	22315239	7677036	34.4027	320.31	25
C008200_cfDNA	92118086	91082594	98.8759	86246329	93.6258	55707222	64.5908	51018328	59.1542	2342.5	164	30539107	8942372	29.2817	385.21	8.27
C008200_gDNA	45589064	45214886	99.1792	42817721	93.921	19533628	45.6204	25307019	59.1041	1091.69	174	23284093	12034683	51.6863	506.93	25
C008204_cfDNA	155523352	153729002	98.8463	146103330	93.943	113274648	77.5305	133289746	91.2298	5960.12	151	32828682	29162081	88.8311	1271.08	25
C008204_gDNA	51754608	51621976	99.7437	48785821	94.2637	38052998	78.0001	43969948	90.1285	1660.66	115	10732823	9156298	85.3112	336.92	25
C008287_cfDNA	98541964	97385272	98.8262	92233381	93.5981	67197420	72.8559	58025362	62.9115	2663.6	162	25035961	5164011	20.6264	217.59	5.3
C008287_gDNA	46236780	45558768	98.5336	43155666	93.3362	24194376	56.063	27212934	63.0576	1171.36	159	18961290	9118053	48.0877	374.01	25
C008369_cfDNA	98143800	97637500	99.4841	93036888	94.7965	70189488	75.4426	82265402	88.4223	3724.65	156	22847400	19109393	83.6392	840.82	20
C008369_gDNA	99691570	99468636	99.7764	94489353	94.7817	74215760	78.544	84332159	89.2504	3509.24	138	20273593	16719548	82.4696	665.63	25
C009157_cfDNA	66976178	66675012	99.5503	62969159	94.0172	44783872	71.1203	43910763	69.7338	1960.81	150	18185287	6923128	38.0699	292.81	14.47
C009157_gDNA	31912142	31707120	99.3575	30080895	94.2616	14772496	49.1092	18213244	60.5475	789.53	187	15308399	7526907	49.1685	314.98	25
C009262_cfDNA	71849692	71228064	99.1348	67350627	93.7382	46988530	69.767	57878667	85.9363	2638.23	155	20362097	16929432	83.1419	758.94	25
C009262_gDNA	114198426	113899544	99.7383	108024833	94.594	89492016	82.8439	91158257	84.3864	3888.34	146	18532817	12685118	68.4468	510.38	25
C009407_cfDNA	93918412	93379470	99.4262	87721733	93.4021	60332254	68.7769	54262342	61.8574	2417.88	148	27389479	7232874	26.4075	307.28	10.6
C009407_gDNA	41979670	41592988	99.0789	39367317	93.7771	19916476	50.5914	24289395	61.6994	1048.66	172	19450841	10013433	51.4807	418.55	25
