# Supplementary material for: CUPiD: A cfDNA methylation-based tissue-of-origin classifier for Cancers of Unknown Primary
Source: Research Square preprint supplement (doi:10.21203/rs.3.rs-3758456/v1), 2023-12-26
Supplement: Supplementary file 6 [file b6f8de19360ffd7449f77a1b.xlsx]

## Sheet: Validation_methylation_metrics 
Supplementary Table 3: Clinical characteristics and T7-MBD-Seq metrics of cfDNA from 143 patients and 27 NCCs. Sequencing details for the enriched fractions (blue) and non-enriched fractions (green).
sample_name	correct_class	age	sex	source	cfDNA yield (ng/mL)	DNA input (ng)	ichorCNA Tumour Fraction	Hyper-stable Fraction	Initial Reads	Mapped Reads	Deduplicated Reads	Total Fragments in QSEA	Final Valid Fragments	enrichment score (relH)	enrichment score (GoGe)	Initial Reads (non-enriched)	Mapped Reads (non-enriched)	Deduplicated Reads (non-enriched)	Total Fragments in QSEA (non-enriched)	Final Valid Fragments (non-enriched)	enrichment score (relH), non-enriched	enrichment score (GoGe), non-enriched
TAR00012	LUAD	56	Female	TARGET trial	22.37	6.65	0.349	0.655	27560606	23944250	17756090	6317089	5566812	3.61908	1.99555	4359866	2508787	2066488	856668	821227	1.33842	0.92547
TAR00014	KIRC	61	Male	TARGET trial	17.55	10.15	0.009552	0.654	13910202	12864934	10541154	3618587	3197717	5.19879	2.38441	1718310	1347717	1173834	487208	471261	1.34532	0.953447
TAR00019	ACC	32	Female	TARGET trial	9.23	5.25	0.03155	0.779	104565838	91436725	62790091	24342857	21860427	3.36303	1.85412	15461370	14199967	12226817	5155881	4883408	1.31625	0.932779
TAR00020	CervSq	57	Female	TARGET trial	2.56	1.75	0.09557	0.735	40748038	32582709	22730551	8610815	7674709	4.24693	2.11258	10691958	7565973	6523550	2751477	2617393	1.32805	0.935469
TAR00030	LUSC	58	Male	TARGET trial	7.87	20	0.113	0.82	163535094	143917143	108721093	37581147	33248481	5.09921	2.37481	12797126	9780558	8333118	3324294	3217269	1.28061	0.896402
TAR00036	LowerGI	49	Male	TARGET trial	23.13	20	0.2287	0.825	62472996	53812702	42852847	16822164	15299776	4.31461	2.1598	17775076	15495609	13518813	5499341	5324411	1.5091	0.946156
TAR00059	LUAD	58	Male	TARGET trial	16.25	20	0.04108	0.797	86876804	76979078	58734706	19967305	17548381	5.0271	2.37016	6846540	4956927	4244405	1698103	1640453	1.31251	0.902829
TAR00072	LUAD	63	Female	TARGET trial	7.91	10	0.05434	0.795	84454072	79103687	56245470	20139050	17490151	4.98005	2.33036	9222698	8409602	7143425	3043156	2888950	1.30571	0.936752
TAR00073	CHOL	36	Female	TARGET trial	21.02	20	0.4024	0.767	63665444	56771520	44671454	13940496	11978120	4.72678	2.30543	18554876	16144499	14239644	5889062	5545228	1.3858	0.946111
TAR00074	BRCA	31	Female	TARGET trial	8.31	10	0.269	0.73	23406612	20325577	16810467	6509915	5772979	4.01817	2.12205	5677700	3740862	3206589	1264282	1205124	1.21175	0.865138
TAR00078	LUAD	72	Female	TARGET trial	9.45	16.55	0.01769	0.792	73600580	66248140	50694018	17746160	15348412	5.37835	2.4361	5490932	4222304	3608736	1443829	1367877	1.34624	0.91661
TAR00087	LowerGI	41	Male	TARGET trial	5.86	10	0.129	0.767	85776430	78217114	55530301	19771865	17453417	5.03383	2.33204	9671966	8004697	6783292	2889344	2785840	1.27984	0.928246
TAR00093	LowerGI	61	Female	TARGET trial	15.11	20	0.07569	0.744	142380328	120120664	94291492	39856199	36691202	2.64767	1.52399	10943554	8768261	7647058	3115413	2980860	1.4873	0.946532
TAR00097	CHOL	40	Female	TARGET trial	8.48	10.52	0.02402	0.814	81853360	76896719	61817280	21647242	19033123	4.35399	2.18456	6849144	5950686	5204063	2169033	2053650	1.31777	0.933862
TAR00098	ACC	65	Female	TARGET trial	378.78	20	0.01934	0.758	33294688	27235629	19032890	6919008	6025894	5.56758	2.44842	4715846	2584801	1990917	820109	776608	1.22173	0.913431
TAR00101	LUAD	28	Female	TARGET trial	86.01	35	0.08426	0.61	16992926	16277791	14963052	5514674	4831479	3.92527	2.12596	2013110	1928600	1823110	748140	704575	1.11341	0.907671
TAR00104	BRCA	37	Female	TARGET trial	10.97	20	0.1144	0.774	32372374	28230527	22081260	7720153	6702673	4.77533	2.29351	4120834	2731094	2263437	901904	856281	1.20298	0.889797
TAR00108	BRCA	69	Female	TARGET trial	8.52	10	0.1039	0.744	24982362	21850109	18081697	7072224	6227577	3.9573	2.09242	5462936	3604230	3091724	1220830	1147079	1.24887	0.876706
TAR00110	LUAD	62	Male	TARGET trial	15.54	20	0.01926	0.751	37150142	32532647	25195102	8580038	7543615	4.79343	2.30969	2433132	1876220	1608132	641839	620205	1.31567	0.905681
TAR00111	LowerGI	34	Female	TARGET trial	24.4	20	0.3013	0.832	72985140	66441506	53043006	19484419	17241513	4.41107	2.18673	13709048	12467091	10911957	4382740	4156059	1.51701	0.959414
TAR00112	UpperGI	47	Male	TARGET trial	96.68	10	0.01316	0.67	16786082	13916988	9931352	3606684	3208608	4.78493	2.21064	6561154	4665114	4114628	1756394	1695772	1.2562	0.933041
TAR00113	LowerGI	61	Male	TARGET trial	137.17	20	0.2724	0.813	68310362	63232671	50031952	19110717	17221512	4.75287	2.26436	12659316	12019778	10462415	4217726	4071902	1.68541	1.00746
TAR00115	BRCA	52	Female	TARGET trial	NA	NA	0.4541	0.551	114963914	109508370	53056747	15277230	12886873	6.73656	2.8015	11255546	9815858	8384054	3108472	2960040	1.58518	1.04557
TAR00128	KIRC	58	Female	TARGET trial	16.2	20	0.01819	0.76	26844918	25524116	20571850	7306977	6323304	4.72019	2.30402	2971474	2472472	2141968	899811	852985	1.41777	0.950075
TAR00130	UpperGI	62	Male	TARGET trial	192	20	0.01927	0.749	23527304	21280814	14930174	5240126	4630503	5.27978	2.31519	1747550	1385336	1025099	432620	418820	1.46982	0.97382
TAR00131	CervSq	63	Female	TARGET trial	223.2	20	0.02251	0.767	27207904	23351614	16789644	5921782	5163171	4.67427	2.17751	1751536	1047915	813486	329199	312186	1.41606	0.94802
TAR00133	UpperGI	39	Female	TARGET trial	544.8	20	0.06793	0.765	27689602	25830700	17948137	6347291	5545626	5.85278	2.47897	2305370	1984026	1430659	608067	580708	1.4935	0.978349
TAR00139	LowerGI	57	Female	TARGET trial	147.41	20	0.1505	0.776	33649678	29402148	23201704	8684565	7748989	5.06714	2.31371	5440450	4559755	3921799	1544728	1470731	1.81259	1.05843
TAR00149	CervSq	44	Female	TARGET trial	944.69	20	0.01043	0.767	27091210	24267683	17225122	6248741	5439900	5.26088	2.33114	1536628	1216498	944642	384832	364914	1.4554	0.960342
TAR00154	Gynae	49	Female	TARGET trial	10.01	17.52	0.03467	0.541	11256662	10518810	8534967	3135985	2748675	4.02051	2.09331	1145436	729451	638938	266531	253377	1.44692	0.964824
TAR00158	LowerGI	54	Female	TARGET trial	254.34	20	0.1552	0.737	27685394	24127924	18961401	7123141	6273640	4.99138	2.32257	5249690	4499294	3905538	1556275	1472763	1.61376	0.991581
TAR00159	LowerGI	67	Male	TARGET trial	36.64	35	0.2398	0.666	7552936	7383224	6934225	2819564	2575608	4.91451	2.34456	5153118	4487114	4021018	1525858	1469159	1.80919	1.03136
TAR00160	Gynae	55	Female	TARGET trial	17.67	20.31	0.2947	0.809	55865920	53589455	43129591	15530151	13631716	4.45387	2.23514	5496924	5062001	4434281	1879042	1783595	1.48307	0.977006
TAR00161	Gynae	68	Female	TARGET trial	5.91	10.35	0.02647	0.786	33618628	32062014	26044018	9359321	8142017	4.99507	2.34482	2676166	2472539	2157730	921489	875321	1.43081	0.960055
TAR00164	LUSC	38	Male	TARGET trial	3.06	10	0.1148	0.733	58268146	53376507	38170907	14050034	12486570	4.99146	2.32708	6118952	4967248	4157020	1792838	1731814	1.38236	0.954309
TAR00167	BRCA	43	Female	TARGET trial	36.55	20	0.4407	0.758	68819286	61147008	47588098	17390226	15008679	5.3053	2.38695	5865436	4307724	3578635	1437902	1350538	1.32019	0.923235
TAR00168	LUSC	61	Male	TARGET trial	8	20	0.02669	0.77	47123618	41896413	32409443	11349491	10025933	5.51693	2.43195	3182060	2402148	2036709	820632	794443	1.44099	0.944445
TAR00170	LowerGI	56	Male	TARGET trial	12.64	20	0.08014	0.799	79032772	70440101	55715849	20611702	18482187	4.75489	2.29889	15213112	13865370	12134570	4814521	4660443	1.39836	0.930906
TAR00171	LowerGI	56	Female	TARGET trial	7.71	10	0.1543	0.772	67434956	59919395	42714088	15518658	13478389	5.15606	2.38596	8084586	5865719	4916547	2109349	1999078	1.37722	0.958941
TAR00174	LUAD	74	Female	TARGET trial	21.77	35	0.2657	0.822	30449820	29128650	26801435	10311021	9325249	4.34256	2.15611	3200012	3076797	2888403	1184979	1116046	1.51646	0.986107
TAR00177	LowerGI	48	Male	TARGET trial	33.68	35	0.2894	0.495	6273354	6069537	5667181	2278116	2050958	4.75377	2.30677	4076082	3222755	2866594	1065699	1027442	1.85002	1.05016
TAR00181	Gynae	68	Female	TARGET trial	6.42	9.36	0.01632	0.731	24030482	22251993	18111867	6522737	5747923	4.26093	2.14118	1633238	1449190	1261098	523366	496979	1.3818	0.963008
TAR00184	LowerGI	62	Male	TARGET trial	9.28	10	0.2455	0.837	166894670	155216458	108332063	38669237	34312838	5.51757	2.46193	17094048	15339676	12957424	5545841	5370279	1.38393	0.955712
TAR00185	LowerGI	34	Female	TARGET trial	26.56	35	0.1912	0.832	19203860	18714865	17653013	7309520	6627869	4.96654	2.35353	13111854	11255426	10076862	3868258	3690884	1.81661	1.03578
TAR00188	LUAD	74	Male	TARGET trial	8.46	8.32	0.007096	0.758	52862608	49455423	35536983	12744684	11274839	4.8599	2.27567	4162014	3662142	3114454	1342610	1299613	1.41058	0.966417
TAR00189	LowerGI	70	Male	TARGET trial	30.08	20	0.2429	0.885	94037110	80323347	63416830	23354327	20980545	5.62205	2.45187	24085280	21827123	18606966	6599577	6353135	1.57978	1.00692
TAR00194	LowerGI	47	Male	TARGET trial	3.45	6.03	0.01632	0.647	35260916	30348960	22564431	8262666	7399797	3.18158	1.80575	4386804	2325269	1951309	797186	770616	1.27093	0.910859
TAR00196	LowerGI	51	Female	TARGET trial	29.89	35	0.2496	0.659	22130680	21718302	20371972	7706962	6773022	4.79132	2.36754	17997628	16705846	14889268	5578369	5326764	1.78064	1.03263
TAR00198	BLCA	53	Male	TARGET trial	2.37	4.15	0.04546	0.707	40443404	33714234	23644652	9157634	8346936	3.44503	1.84477	9465040	5571216	4746921	1932331	1866575	1.30884	0.930336
TAR00201	BRCA	39	Female	TARGET trial	4.87	8.53	0.3699	0.733	25672660	23362366	19356181	7502939	6720903	3.9282	2.06121	5263768	3799427	3245188	1293471	1225770	1.30962	0.88492
TAR00203	UpperGI	49	Male	TARGET trial	383.77	20	0.01525	0.73	21875406	21024424	14892081	5349466	4731267	4.20094	2.06212	1891992	1698522	1274331	530272	513151	1.3523	0.950198
TAR00206	LowerGI	48	Male	TARGET trial	42.46	35	0.3433	0.624	12977664	12694102	12044206	4923880	4465504	4.75859	2.33039	8754924	7776826	6977489	2682744	2598247	1.74145	1.01221
TAR00207	LowerGI	45	Male	TARGET trial	30.06	35	0.338	0.567	9883234	9680329	9172354	3655261	3277584	4.38139	2.2457	7083298	6082513	5466375	2009954	1935819	1.65511	1.01008
TAR00213	BRCA	49	Female	TARGET trial	76.54	20	0.1233	0.781	66334690	59901133	46179434	17277596	15089177	5.66595	2.50635	8957094	7432750	6161882	2514328	2380892	1.28341	0.904009
TAR00215	Gynae	61	Female	TARGET trial	110.35	20	0.06048	0.769	100200158	94667177	72198848	27766992	24850139	3.53701	1.87694	4814260	4450043	3865026	1656176	1575799	1.62318	1.01137
TAR00216	LowerGI	66	Male	TARGET trial	113.27	35	0.2639	0.707	15991544	15442121	14335668	5403710	4771288	4.95881	2.40345	10352448	8473036	7628084	2765541	2648754	1.68483	1.00724
TAR00219	LowerGI	55	Male	TARGET trial	240	20	0.09969	0.8	67810880	54843060	43564175	17094925	15490269	4.02453	2.07281	11335572	9516101	8321406	3323003	3208466	1.43827	0.942015
TAR00220	LUSC	74	Male	TARGET trial	4.13	19.95	0.272	0.871	68815128	63772973	48850733	15845699	13796034	5.63473	2.48168	6491788	5428403	4610288	1861370	1801266	1.36703	0.921524
TAR00223	LowerGI	59	Male	TARGET trial	240	35	0.2288	0.694	26046534	25269697	23445301	9046104	8045363	4.03779	2.17361	13710680	12006925	10783993	3826328	3683875	1.67988	1.01768
TAR00229	LIHC	67	Male	TARGET trial	49.25	20	0.01394	0.827	67709752	63083165	43288420	15378717	13409302	6.00168	2.51282	7522316	6425197	4665628	1951286	1885799	1.39555	0.951956
TAR00232	BRCA	43	Female	TARGET trial	19.94	18	0.3178	0.85	73679086	68885885	53653706	19019397	16489468	5.32863	2.41041	5978504	5353770	4470532	1793126	1700025	1.29845	0.912982
TAR00241	LowerGI	64	Male	TARGET trial	62.11	20	0.1807	0.873	124539078	101705156	80558055	31148165	28197677	5.48837	2.43322	22253052	19633445	17073065	6898127	6644893	1.68981	1.00233
TAR00247	Gynae	59	Female	TARGET trial	11.49	20.11	0.1139	0.797	36146902	34188719	27520815	9842077	8609902	4.13243	2.1525	3747612	3361947	2955294	1243889	1183814	1.33191	0.931055
TAR00248	CHOL	67	Male	TARGET trial	14.25	24.94	0.14	0.606	15438018	14710410	13644306	4697492	4136466	3.73765	2.10492	2087540	2015411	1932604	764329	738983	1.22153	0.924103
TAR00250	LowerGI	55	Female	TARGET trial	76.98	20	0.4093	0.867	57485106	50374540	39957689	15455576	13836701	5.02846	2.34701	15497600	13942674	12116132	4933103	4660433	1.68989	1.02235
TAR00253	ACC	43	Male	TARGET trial	33.87	10	0.01013	0.832	53449220	47038050	33125263	12378892	11183921	4.02509	2.03087	12318606	11197909	9875834	4244133	4100276	1.25476	0.925496
TAR00254	LowerGI	53	Male	TARGET trial	47.51	20	0.2242	0.848	97022592	78621744	64065739	22985684	20668833	4.99893	2.36193	9699234	7622368	6385746	2517003	2429910	1.46028	0.954637
TAR00256	BRCA	40	Female	TARGET trial	3.89	8	0.1423	0.724	39101458	35504680	26523530	9707151	8552667	3.87745	2.03687	4298888	3411872	2897362	1220598	1152830	1.25677	0.914903
TAR00262	BRCA	39	Female	TARGET trial	8.33	12.03	0.01204	0.763	79806000	72631283	51359652	18528420	16088057	5.27922	2.40205	8342580	7188988	6123627	2609094	2474215	1.34416	0.947082
TAR00264	UpperGI	23	Male	TARGET trial	253.13	20	0.2385	0.846	103056362	95365776	64767253	24646924	22286791	4.85009	2.23427	8684452	7570567	5582759	2310472	2230749	1.53754	0.993825
TAR00277	UpperSq	75	Male	TARGET trial	50.7	20	0.05206	0.834	110556906	102041173	69988799	26318516	23567197	4.39386	2.13377	7493780	6667707	4952152	2058149	1993667	1.39974	0.963282
TAR00278	LUAD	61	Female	TARGET trial	7.83	20.29	0.05634	0.807	104237980	92052290	70050875	24702730	21509843	5.0825	2.37556	8477156	6665975	5695217	2245949	2128149	1.25278	0.892991
TAR00279	LUSC	75	Female	TARGET trial	7.02	10	0.1923	0.797	138586694	122602428	86508751	31772742	28015917	4.91326	2.32194	11979868	10305245	8796284	3749956	3557037	1.28532	0.932191
TAR00280	LUAD	68	Female	TARGET trial	8.96	20	0.02149	0.811	98221900	80595108	61679096	21328376	18531415	4.81183	2.29296	6281854	4807070	4117870	1638414	1547118	1.21627	0.889577
TAR00283	LUAD	57	Male	TARGET trial	17.54	35.07	0.194	0.788	25679366	24752952	23140388	8556542	7737961	4.44729	2.23668	3191488	3087527	2963773	1220374	1179708	1.37639	0.939262
TAR00289	CHOL	47	Female	TARGET trial	2.94	6.71	0.01789	0.731	31932082	27259858	23227205	8698311	7650544	4.3329	2.20422	4912348	3789152	3335495	1308937	1241378	1.35535	0.915563
TAR00296	Gynae	36	Female	TARGET trial	9.83	20	0.0137	0.742	31761408	30492801	24677689	8682393	7579164	3.94578	2.07907	2559960	2224542	1970236	824702	781062	1.28748	0.926682
TAR00298	BRCA	48	Female	TARGET trial	9.18	20	0.01024	0.781	32826270	30070722	23547015	8746264	7608005	5.00331	2.3164	3266506	2524640	2112263	866351	820303	1.23984	0.897951
TAR00300	LowerGI	64	Male	TARGET trial	18.48	20	0.3326	0.839	103968896	85961125	70397223	24767671	22142379	5.25104	2.40746	8118582	6288830	5301825	2106867	2030295	1.42088	0.925587
TAR00305	BLCA	65	Female	TARGET trial	7.25	20	0.3047	0.926	178562416	165432391	112735279	42209577	37412368	4.78482	2.21302	13174598	9815878	7162553	2880141	2729092	1.52528	1.0091
TAR00310	LowerGI	74	Male	TARGET trial	12.12	20	0.2301	0.786	43701956	37065329	30774956	10635357	9537864	4.75104	2.27346	4369656	3447547	2895805	1115240	1077929	1.52472	0.969969
TAR00311	CHOL	73	Male	TARGET trial	51.47	35	0.01058	0.753	30751686	29542826	27506405	10397384	9384130	4.33881	2.20755	3258560	3157026	3042269	1265862	1225716	1.46437	0.959378
TAR00319	LowerGI	40	Male	TARGET trial	54.8	20	0.2502	0.783	64681138	58057712	47169496	16395239	14724986	5.61136	2.51535	5961832	5232377	4379452	1720244	1662417	1.5791	0.978498
TAR00323	LowerGI	58	Female	TARGET trial	32.38	20	0.06815	0.774	35543110	30267602	25098302	8655581	7590526	4.46895	2.19879	2922588	2097828	1776349	693857	658290	1.39896	0.925202
TAR00327	LowerGI	64	Male	TARGET trial	64.37	20	0.1353	0.799	50758042	44736370	37019649	12472740	10973919	5.17913	2.4037	4136050	3347284	2820238	1084157	1038034	1.48615	0.959692
TAR00330	BRCA	29	Female	TARGET trial	100.29	20	0.3304	0.809	146853628	137051489	104730144	38471543	34006288	5.25386	2.41576	12436728	11023427	9203233	3748867	3589137	1.35633	0.929228
TAR00331	LUAD	65	Female	TARGET trial	37.7	35	0.02186	0.65	18288152	17909278	16932618	6717819	5898235	4.86851	2.40504	3431906	3362696	3233659	1429512	1359288	1.46349	0.979906
TAR00338	LUAD	65	Female	TARGET trial	14.58	26.25	0.02706	0.484	11009804	10809070	10224186	4019022	3529609	4.25738	2.21623	1803822	1774338	1706193	750384	712065	1.44299	0.984513
TAR00341	BRCA	62	Female	TARGET trial	3.84	8	0.01471	0.795	52827064	49588784	37096628	13454939	11803946	3.62389	1.99276	5991676	5116129	4376858	1836724	1739563	1.22346	0.903452
TAR00353	BRCA	40	Female	TARGET trial	6	7.2	0.1159	0.687	39413668	35322218	21993920	7989890	7041307	4.22783	2.16279	4963886	3463565	2972717	1084034	1030905	1.37931	0.956832
TAR00354	LUAD	64	Male	TARGET trial	27.47	35	0.1506	0.717	34610824	33997074	32058291	12795614	11430964	4.363	2.22973	5721284	5631145	5428007	2381057	2293206	1.40131	0.957567
TAR00357	BRCA	65	Female	TARGET trial	24.16	20	0.00484	0.816	93238380	85167741	65745157	23761783	20657806	5.26182	2.39846	10133004	8671489	7253596	2947400	2788437	1.22727	0.896137
TAR00359	BLCA	63	Female	TARGET trial	5.27	10	0.007147	0.799	29961266	26450331	18691379	6743563	5888689	5.02414	2.29295	10657016	8878130	7859344	3391087	3210625	1.25221	0.932451
TAR00362	LUAD	72	Female	TARGET trial	17.93	35.86	0.1897	0.8	29208896	28332621	26532348	9902170	8827940	4.80363	2.33082	3668414	3580157	3443968	1421271	1353161	1.44938	0.959607
TAR00363	CervSq	37	Female	TARGET trial	17.87	7.45	0.02253	0.62	18961694	17612942	12415056	4708409	4179254	4.21363	2.10918	4576626	4252364	3679055	1567324	1485124	1.34103	0.934863
TAR00365	LowerGI	49	Male	TARGET trial	31.97	20	0.1243	0.793	72372934	61893089	50915166	17379317	15476638	5.1944	2.38957	5165620	4217059	3547662	1353282	1309122	1.51427	0.968511
TAR00370	LowerGI	38	Male	TARGET trial	18.95	20	0.2567	0.776	67879976	55971596	46436453	15435419	13696293	4.39754	2.21789	5107754	3867330	3255622	1179036	1131249	1.37975	0.947207
TAR00371	CHOL	58	Female	TARGET trial	6.59	23.05	0.01767	0.733	27041500	26204394	24412699	9228044	8174684	4.06514	2.14407	3066580	2998231	2895258	1185284	1123107	1.36586	0.926488
TAR00373	LowerGI	49	Female	TARGET trial	58.04	20	0.3059	0.848	131924934	108654425	88345164	30108305	25877694	4.76091	2.33098	11910962	9918092	8379738	3258455	3028000	1.36013	0.920189
TAR00382	UpperGI	65	Male	TARGET trial	24.62	10	0.1008	0.786	32352112	28784640	20482564	7413010	6650043	4.70196	2.19009	8807742	7874607	6935215	2912377	2815462	1.35311	0.966599
TAR00386	BRCA	48	Female	TARGET trial	8.63	20	0.01396	0.813	73726884	63638296	49568566	18958363	16791311	4.03802	2.07229	5177960	4011923	3359185	1359838	1286166	1.19402	0.889915
TAR00389	UpperGI	69	Male	TARGET trial	95.8	20	0.0143	0.799	65762392	55307798	38143092	14145735	12629822	4.44005	2.18873	6490774	4694250	3495521	1468720	1420594	1.26752	0.916154
TAR00391	BRCA	72	Female	TARGET trial	4.53	10	0.003488	0.564	53281680	49463509	24465016	7602240	6505721	5.00172	2.32521	7564198	5202269	4446632	1660978	1575369	1.49313	1.00179
TAR00392	KIRC	63	Male	TARGET trial	8.06	20	0.0199	0.816	69800422	66460188	53461386	19608563	17413565	4.11684	2.12268	5779788	5165673	4560735	1921396	1857093	1.33833	0.93424
TAR00396	BLCA	80	Male	TARGET trial	6.18	10	0.04183	0.818	49783112	46800656	37976361	13643620	12313715	3.90687	2.06272	3749886	3350412	2927989	1231079	1190522	1.27516	0.927693
TAR00399	KIRC	56	Female	TARGET trial	6.31	10	0.009813	0.769	29864916	27292556	22298077	7890372	6904350	4.54758	2.27095	3344102	2904203	2550474	1077300	1018634	1.22747	0.908148
TAR00404	CervSq	36	Female	TARGET trial	72.57	20	0.02382	0.816	48538708	43391406	31031359	10669673	9270754	5.10175	2.32014	3044378	2486545	1940345	748611	709266	1.38006	0.947426
TAR00407	UpperGI	32	Male	TARGET trial	37.31	10	0.1007	0.763	27144010	21752337	15429667	5729210	5175513	4.16147	2.05169	6996702	5434710	4757351	2023090	1951689	1.28548	0.937009
TAR00408	BLCA	70	Male	TARGET trial	2.94	7.35	0.01045	0.693	42629136	37676624	26458396	10220944	9315913	3.4262	1.84842	5931110	4968182	4294500	1807362	1746737	1.35256	0.945215
TAR00410	CervSq	44	Female	TARGET trial	21.84	9.9	0.02882	0.761	46436870	41724894	33826438	12291804	10869897	3.90262	2.08262	3913090	2977523	2600396	1079061	1017732	1.21479	0.905994
TAR00412	LUAD	69	Female	TARGET trial	16.41	34.47	0.2467	0.846	31158688	30117464	28114219	10608768	9609084	4.59439	2.31628	5607786	5460993	5250571	2146537	2075010	1.27951	0.917132
TAR00418	LowerGI	53	Female	TARGET trial	19.84	20	0.365	0.852	142172210	115177872	93359493	33197943	29053010	5.24295	2.42883	13411576	10449088	8774037	3443958	3254663	1.41314	0.937857
TAR00419	LUAD	64	Female	TARGET trial	4.44	10	0.02816	0.793	71468302	57177356	41106128	15230137	13328454	5.15531	2.35461	6536264	4292657	3608152	1530662	1455678	1.50214	1.00671
TAR00420	Gynae	44	Female	TARGET trial	1.38	5.75	0.206	0.761	44492572	39708992	27738115	10864537	9775986	3.60529	1.91932	8165408	6926145	5963018	2489275	2353938	1.29485	0.924794
TAR00422	LUAD	52	Female	TARGET trial	89.7	20	0.2804	0.756	61180520	46199932	35186431	13237239	11903843	3.84824	1.99223	2911776	1483478	1259766	506150	483609	1.58278	0.994302
TAR00423	CervSq	36	Female	TARGET trial	137.35	20	0.6056	0.878	128069886	113102854	79425783	30029755	26811711	5.10372	2.33875	9167460	7948109	6177114	2578970	2460174	1.38789	0.929405
TAR00428	LowerGI	42	Male	TARGET trial	11.64	20	0.06008	0.781	52812814	40778895	33777690	11733682	10527501	4.39845	2.14927	3892254	2490670	2085047	801222	774854	1.36818	0.927625
TAR00429	BRCA	58	Female	TARGET trial	3.72	8.99	0.08095	0.703	28854444	26534465	21906671	8488389	7506893	3.87033	2.06019	4638420	3567089	3078187	1237691	1173825	1.27575	0.882664
TAR00430	BRCA	53	Female	TARGET trial	5.7	20	0.04354	0.82	87492232	69627022	53408358	19804790	17354550	4.69741	2.26713	7946762	5501120	4585369	1841472	1744863	1.25541	0.9089
TAR00431	UpperGI	67	Male	TARGET trial	14.4	6	0.1333	0.816	95207978	84430488	59063674	23217200	21173369	3.73313	1.96514	15647646	13588492	11745741	5069911	4900728	1.36238	0.940127
TAR00440	UpperGI	60	Male	TARGET trial	3.06	10	0.01853	0.74	32056830	29549331	23719559	8849929	7955488	4.59954	2.2205	3044920	2698615	2338415	987848	955893	1.41133	0.947845
TAR00442	BLCA	60	Male	TARGET trial	1.86	7.75	0.04152	0.834	88193018	78653695	55136445	20373053	18392508	4.42899	2.15203	20796582	17773512	15377863	6569481	6334818	1.30945	0.921978
TAR00443	LowerGI	49	Male	TARGET trial	8.34	20	0.3436	0.823	96309892	80335282	66456836	22912202	20374188	5.03505	2.3674	9879186	8216140	6935320	2656871	2550306	1.40125	0.919885
TAR00451	KIRC	53	Male	TARGET trial	5.58	20	0.01746	0.786	70521504	65567926	52413447	19372444	17434435	3.5526	1.97614	5375220	4789050	4216020	1758489	1699776	1.31367	0.931428
TAR00462	BRCA	37	Female	TARGET trial	4.2	20	0.3266	0.85	69827792	57739825	44871886	16450962	14635447	5.38237	2.44073	9070128	6993302	5824686	2360227	2269034	1.28531	0.901869
TAR00466	LUAD	67	Female	TARGET trial	9.96	20	0.03296	0.786	55068338	42156965	32664658	11652033	10134306	5.0377	2.36407	4367284	2969130	2531954	1017685	965117	1.36609	0.916838
TAR00467	Gynae	36	Female	TARGET trial	3.54	10	0.1214	0.816	63482596	58587433	47658669	17318754	15329864	3.94644	2.09752	5608586	5203140	4577354	1939996	1834223	1.23479	0.909202
TAR00468	LUAD	58	Female	TARGET trial	8.33	10	0.07778	0.774	73885796	66923767	47462021	17403699	15131532	4.81296	2.29336	7761414	6579439	5630971	2404657	2276479	1.26102	0.927146
TAR00469	LUAD	70	Female	TARGET trial	1.62	8.1	0.006247	0.742	55791860	51619552	38351220	13417228	11682356	4.29731	2.16035	6452720	5743982	4886857	2029046	1920685	1.2287	0.90389
TAR00472	BLCA	54	Male	TARGET trial	34.5	20	0.03399	0.848	125178734	119494739	81961537	30570961	27197621	4.50602	2.1763	8249526	7670848	5726313	2463305	2385364	1.45714	0.954142
TAR00476	ACC	37	Female	TARGET trial	3.4	8.5	0.003798	0.829	97954070	81907966	56817240	21306244	18970097	4.1225	2.06683	17901754	15299146	13230335	5617924	5322492	1.36801	0.941384
TAR00478	CervSq	33	Female	TARGET trial	18.1	10	0.007245	0.767	46102138	40790653	32479567	12224677	10850703	4.11178	2.09874	4065324	3508533	3053048	1284237	1218023	1.37267	0.929772
TAR00479	BRCA	50	Female	TARGET trial	2.34	8	0.04659	0.604	38256564	33336645	19258875	6394211	5567440	4.49833	2.26109	5080268	2784693	2356202	898991	852272	1.37638	1.00054
TAR00480	UpperGI	60	Male	TARGET trial	4.7	10	0.00336	0.843	81990398	75895007	52808429	19687050	17606028	5.03446	2.25846	28468556	26242078	23339291	10195583	9859941	1.21616	0.917737
TAR00484	BRCA	52	Female	TARGET trial	7.68	20	0.00564	0.777	87214284	78917435	60490549	21868884	19042274	5.95607	2.55908	11016056	9429277	7830522	3223822	3058335	1.38208	0.939006
TAR00491	CHOL	64	Female	TARGET trial	9.4	32.9	0.00557	0.744	44609370	37815399	30979678	10464739	9138196	4.74502	2.28861	12754890	10903062	9476913	3896640	3692381	1.3915	0.96606
TAR00492	CHOL	72	Male	TARGET trial	26.23	20	0.009881	0.746	74642240	67467762	52303507	20241994	18474148	3.4714	1.85872	4057476	3502125	3029538	1258962	1217515	1.50169	0.99142
TAR00495	ACC	35	Female	TARGET trial	22.3	20	0.007685	0.827	81630654	73310023	51250720	18463040	16275408	4.99144	2.24592	3556102	3142273	2427010	978138	928963	1.57012	1.00094
TAR00504	CervSq	38	Female	TARGET trial	3.3	8.25	0.01151	0.731	47984186	39101331	27307854	10382286	9279651	3.7325	1.98217	10158836	7835374	6735756	2809762	2658665	1.24871	0.907986
TAR00512	CHOL	72	Female	TARGET trial	23.28	20	0.00623	0.705	28385400	24351561	19524243	6707971	5918845	4.54818	2.20296	7456244	5995013	5305760	2260641	2147402	1.52926	0.989117
TAR00513	UpperGI	52	Male	TARGET trial	4.5	10	0.007211	0.792	43659418	36137242	25122021	9629835	8685073	4.23676	2.05834	9286546	7635614	6678505	2874993	2779858	1.34704	0.964044
TAR00517	LUAD	50	Male	TARGET trial	16.08	20	0.1042	0.795	56908818	46753647	35864181	12499180	11004494	5.5794	2.48744	5750680	4089957	3451592	1356613	1309516	1.45148	0.948104
TAR00518	LUAD	70	Male	TARGET trial	7.32	20	0	0.765	75073396	61299386	47076080	16500427	14628066	5.24162	2.38848	5178636	3340141	2843707	1063155	1028998	1.42864	0.945378
NCC0080	NCC	30	Male	Locally collected at the University of Manchester	1.37	7	0.004185	0.814	64205854	59452022	42349507	15936833	14438449	3.88039	2.01732	5441832	4771080	3698524	1539067	1489262	1.44451	0.965957
NCC0081	NCC	21	NA	Locally collected at the University of Manchester	NA	NA	0.004915	0.76	44141402	41864112	30519895	10662861	9601302	3.96702	2.03772	5324150	4835611	3722118	1485663	1437784	1.49395	0.983005
NCC0082	NCC	40	NA	Locally collected at the University of Manchester	NA	NA	0.009714	0.719	30446762	28709407	21067976	7508564	6666499	4.16216	2.10065	3974758	3261994	2492624	969444	913435	1.60085	1.01501
NCC0083	NCC	21	NA	Locally collected at the University of Manchester	NA	NA	0.002926	0.786	58680728	51999240	37677449	13331332	11749606	4.29863	2.14895	9142520	7464365	5743154	2295026	2171746	1.45898	0.97382
NCC0084	NCC	72	Male	Community Lung Health Study	2.54	4.64	0.009185	0.82	98218814	94594286	53821429	19434032	17452404	4.0742	2.07353	10509902	8333020	6285390	2573096	2489626	1.33949	0.945342
NCC0085	NCC	65	Female	Community Lung Health Study	2.58	4.03	0.01408	0.754	56293522	50831793	29367317	10316400	9121129	4.34082	2.16545	6239856	4224874	3137009	1290579	1226908	1.42863	0.967276
NCC0086	NCC	65	Female	Community Lung Health Study	2.97	5.83	0.01205	0.739	57151288	49257340	34709605	13524531	12235756	3.18332	1.79677	4349972	3284807	2509568	974964	924238	1.30219	0.939251
NCC0087	NCC	61	Female	Community Lung Health Study	3.14	5.74	0.01423	0.716	25826356	22033394	15774178	5834154	5176157	4.19245	2.09829	3781322	2443536	1879484	723914	685838	1.29929	0.937634
NCC0088	NCC	71	Male	Community Lung Health Study	9.72	15	0.006814	0.809	87019830	84099238	64998554	23539224	20961677	4.79351	2.30805	10741182	10331632	9707939	4101189	3967045	1.35883	0.971848
NCC0089	NCC	65	Female	Community Lung Health Study	2.22	4.21	0.006526	0.793	131703904	118458682	67558641	24632225	21935086	3.97872	2.05714	10600766	8056491	5996997	2414456	2291545	1.43101	0.970793
NCC0090	NCC	60	Male	Community Lung Health Study	3.95	7.21	0.004273	0.825	61905462	55863619	39218617	15342910	13993807	3.89347	1.98898	5579734	4007739	3073219	1283959	1242672	1.42331	0.961457
NCC0091	NCC	67	Male	Community Lung Health Study	2.29	4.18	0.007991	0.737	73044080	62513249	35981395	13153809	11949646	3.75022	1.99499	9423148	4909013	3641009	1456178	1407192	1.36032	0.960684
NCC0092	NCC	61	Female	Community Lung Health Study	3.32	6.06	0.005311	0.79	63311552	55891540	39222008	15489498	14034799	3.41338	1.85546	5073656	3831307	2947416	1172238	1110859	1.33925	0.943841
NCC0093	NCC	62	Male	Community Lung Health Study	3.3	6.03	0.00241	0.74	57828114	50738679	35289984	13931210	12793665	3.0616	1.74379	4643622	3115654	2371984	946756	915190	1.33078	0.951515
NCC0094	NCC	73	Female	Community Lung Health Study	3.75	6.85	0.01025	0.751	59516152	50153880	35267139	13491101	12120425	3.20323	1.81261	4808654	3491073	2688490	1086282	1027843	1.22713	0.922717
NCC0095	NCC	58	Male	Community Lung Health Study	3.87	7.06	0.005224	0.783	70514418	64483696	45107462	17541816	16104419	3.36162	1.8385	5307904	4298393	3301497	1356351	1313581	1.32526	0.937984
NCC0096	NCC	67	Female	Community Lung Health Study	2.26	4.13	0.01044	0.814	106866662	100791502	57341570	20623286	18279974	4.36836	2.15637	12062140	9662263	7235094	2976344	2824345	1.37289	0.947254
NCC0097	NCC	71	Female	Community Lung Health Study	3.14	5.95	0.004201	0.717	58394158	50639232	35364043	13930965	12633208	2.79189	1.65495	4319204	2840308	2164181	836004	791323	1.27448	0.941864
NCC0098	NCC	67	Female	Community Lung Health Study	1.65	3.13	0.009721	0.79	74503318	67325931	39863307	14186379	12566965	4.28433	2.14996	7132064	5496643	4133480	1651140	1577176	1.35995	0.956115
NCC0099	NCC	69	Male	Community Lung Health Study	2.15	3.92	0.006146	0.792	80966922	75833187	43562694	15358900	13665286	4.56546	2.23229	10739878	8500942	6421770	2589041	2502221	1.3231	0.938084
NCC0100	NCC	72	Female	Community Lung Health Study	2.78	5.08	0.01163	0.756	88091114	81767952	47615698	16717480	14715937	4.13516	2.10203	9229994	6530346	4855161	1973134	1873927	1.39633	0.958865
NCC0101	NCC	64	Male	Community Lung Health Study	4.83	8.83	0.004962	0.793	93604114	84163779	60281944	22359916	20432159	3.59153	1.90854	11711250	8013430	6005711	2324742	2248219	1.47224	0.999744
NCC0102	NCC	69	Male	Community Lung Health Study	1.89	3.45	0.005904	0.772	53517732	49458538	28751899	10257368	9148254	4.57433	2.22254	6247734	4520291	3370957	1356028	1312185	1.44303	0.973939
NCC0103	NCC	64	Male	Community Lung Health Study	2.5	4.56	0.007339	0.8	112166156	105376588	60291654	21701964	19480977	4.34059	2.14746	13463414	10199617	7685543	3143465	3040237	1.33912	0.940876
NCC0104	NCC	70	Male	Community Lung Health Study	3.71	6.77	0.009341	0.767	72464976	60980947	42522194	16741193	15336223	3.08693	1.75651	6482438	4025896	3078962	1244382	1202831	1.29534	0.934043
NCC0105	NCC	56	Male	Community Lung Health Study	3.87	7.07	0.005125	0.76	85004988	75533052	52570686	20643927	18991418	3.0723	1.72542	5439290	3891931	2977226	1220493	1181019	1.37727	0.953151
NCC0106	NCC	64	Male	Community Lung Health Study	1.76	3.2	0.005079	0.777	78253188	73101428	43767664	15753143	14063102	4.31749	2.15513	8253300	6561918	4925298	1969526	1902879	1.35708	0.952802

## Sheet: Sheet1
56
61
32
57
58
49
58
63
36
31
72
41
40
65
28
37
69
62
34
47
61
52
58
62
63
39
57
44
49
54
67
55
68
38
43
61
56
56
74
48
68
62
34
74
70
47
51
53
39
49
48
45
49
61
66
55
74
59
67
43
64
59
67
55
43
53
40
39
23
75
61
75
68
57
47
36
48
64
65
74
73
40
58
64
29
65
65
62
40
64
65
63
72
37
49
38
58
49
65
48
69
72
63
80
56
36
32
70
44
69
53
64
44
52
36
42
58
53
67
60
60
49
53
37
67
36
58
70
54
37
33
50
60
52
64
72
35
38
72
52
50
70
