# Supplementary material for: CUPiD: A cfDNA methylation-based tissue-of-origin classifier for Cancers of Unknown Primary
Source: Research Square preprint supplement (doi:10.21203/rs.3.rs-3758456/v1), 2023-12-26
Supplement: Supplementary file 7 [file e51ae0bfc0e13a3cbb661d78.xlsx]

## Sheet: Sheet1
Supplementary Table 5: Clinical and pathological characteristics of CUP cohort, tumour type enriched alterations (TTAEs) and CUPiD Predictions
CUP ID	Age at consent	Gender	Smoking status	Radiological sites of disease	Pathology	Additional MDT notes, differential diagnosis/highly suspected or latent primary	Subsequent primary tumour type determined	Biopsy site	CK7	CK20	AE1/3	BerEP4	CDX2	PAX8	GATA3	CK5/6	TTF-1	HepPar1	WT1	PR	ER	Other stains - positive	Other stains - negative	Clinically resolved	Highly suspected cancer or retrospectively suspected/confirmed	Differential diagnosis	Clinical Status	TTEAs	Disease type associated with gene alterations (those aligning with clinical suspicion highlighted in blue) Aactionable alterations, level 3 and above, highlighted in red	Mutations supportive of suspected or known diagnosis	CUPiD prediction Class 1	Class 1 prediction score	CUPiD prediction Class 2	Class 2 prediction score	Hyperstable fraction	Estimated Tumour Fraction by IchorCNA	Final CUPiD call	Clinical correlation
TAR00007	69	Male	Never	Right axilla	NET (likely large cell	Negative for merkel cell polymavirus - does not entirely exclude		lymph node right axilla	0	0.5	1	ND	0	0	0	ND	0	ND	ND	ND	ND	Synaptophysin	Chromogranin				No suspicion	SPEN XPO1 KDR CDKN1A KMT2C NOTCH1 ERBB3 CYLD TP53 FLCN NF1 ERCC2 ASXL1 RUNX1 MED12	Breast, Uterus:Endometrium Uterus:Endometrium Melanoma Urothelial tract Breast, Prostate, Urothelial tract Head and neck: other, Skin:SCC Colorectum/Appendix/Small intestine, Esophagus/Stomach, Urothelial tract, Uterus:Endometrium Head and neck: other Colorectum/Appendix/Small intestine, Esophagus/Stomach, Lung: Non-small Cell, Lung: Small Cell, Ovary/Fallopian tube, Pancreas, Skin:SCC Colorectum…	Not supportive	LUSC	0.696312	UpperSq	0.173796	0.698	0.2594	LUSC	Unknown
TAR00013	49.0438	Female	Never	Liver, Lungs & Lymph Nodes	Poorly differentiated adenocarcinoma	GI/HPB, lung, breast; Cholangiocarcinoma confirmed on subsequent MDT review of radiology	Intrahepatic cholagiocarcinoma	Liver biopsy	1	0	ND	ND	0	0	0	0	0	0	ND	ND	ND	Glypican3 (weakly)	CK14, p63	Cholangiocarcinoma			Clinically resolved	BAP1 GNAQ ATRX	Bile duct/Gallbladder, Kidney, Mesothelium Melanoma Bone/Soft tissue, Uterus:Endometrium	Supportive	CHOL	0.948145	LUSC	0.0310317	0.445	0.08492	CHOL	Confirmed
TAR00043	70.1863	Male	Former	liver and porta hepatis	High grade adenocarcinoma	Radiology reviewed retrospectively and in keeping with gallbladder/HPB cancer		Liver biopsy	0	0	1	ND	0.5	0	0	ND	0	0	ND	0	0	Cam5.2; CEA (weakly)	CD10, synaptophysin, chromogranin			Upper GI/Pancreatobililary	Differential diagnosis	NOTCH1 KRAS TP53 AR	Head and neck: other, Skin:SCC Colorectum/Appendix/Small intestine, Lung: Non-small Cell, Pancreas Colorectum/Appendix/Small intestine, Esophagus/Stomach, Lung: Non-small Cell, Lung: Small Cell, Ovary/Fallopian tube, Pancreas, Skin:SCC Prostate	Supportive several	UpperGI	0.466071	BLCA	0.32578	0.74	0.1421	Unclassified	Unknown
TAR00057	61.1233	Female	Former	small Lung lesion and bone	Poorly differentiated carcinoma	Renal or female genital tract suspected on pathology review		Right iliac bine biopsy	0	0	1	ND	ND	1	0	ND	0	ND	ND	ND	ND	MNF116, INI-1, S100 (weakly)	CD34, SOX10, GCDFP15, desmin, SMA, CD31, ERG			Renal or female genital tract	Differential diagnosis	SETD2 BAP1 NF2	Kidney, Lung: Non-small Cell, Mesothelium Bile duct /Gallbladder, Kidney, Mesothelium Kidney, Mesothelium	Supportive	KIRP	0.673722	KIRC	0.133276	0.822	0.05169	KIRP	Clinically consistent
TAR00062	48.8767	Female	Former	Mediastinum, cervical lymph nodes	Poorly differentiated carcinoma	Possibility GI on pathology review		Left supraclaviculra lymph node	0	0	1	ND	0.5	ND	ND	ND	0	ND	ND	ND	ND	None	Mammoglobin			GI	Differential diagnosis	KRAS ARID2 NF1	Colorectum/Appendix/Small intestine, Lung: Non-small Cell, Pancreas Melanoma, Skin:SCC Melanoma, Uterus:Endometrium	Supportive	UpperGI	0.620571	LUSC	0.240857	0.807	0.01481	UpperGI	Clinically consistent
TAR00068	51	Female	Former	Left sided axillary and cervical lymph nodes	Poorly differentiated carcinoma	Pathology suspected breast primary - subsequently treated as breast	Breast cancer	Left neck lymph node	1	0	1	ND	0	ND	0.5	0	0	ND	ND	0	0	MNF116	CD3, CD30, CD20, NapsinA, CK14, GCDFP15, Mammoglobin, LCA, p63, HER2	Breast			Clinically resolved	TP53	Colorectum/Appendix/Small intestine, Esophagus/Stomach, Lung: Non-small Cell, Lung: Small Cell, Ovary/Fallopian tube, Pancreas, Skin:SCC	Not supportive	BRCA	0.999874	LUSC	6.02893e-05	0.654	0.1689	BRCA	Confirmed
TAR00069	69	Female	Former	Bilateral inguinal lymph node adenopathy, abdominal lymphadenopathy, bilateral axillary lymphadenopathy	Poorly differentiated carcinoma	Pathology favours female genital tract	Female genital tract	Right inguinal lymph node	1	0.5	ND	ND	0	1	0	ND	ND	ND	1	0	0.5	None	None	Female genital tract			Clinically resolved			None	Gynae	0.862027	SARC	0.0482511	0.634	0.05233	Gynae	Confirmed
TAR00070	32.011	Male	Never	Umbilical nodule, peritoneal, left pararenal space	Poorly differentiated carcinoma	UGI/Pancreatobilary; ?GI (IBD)		Peritoneal biopsy	1	0.5	ND	ND	0.5	0	ND	ND	0	ND	ND	ND	ND	None	PSA, RCC, Calretinin		Presumed GI		Highly suspected	ATR DICER1 CDH1 TP53 SMARCB1	Uterus:Endometrium Uterus:Endometrium Breast, Esophagus/Stomach Colorectum/Appendix/Small intestine, Esophagus/Stomach, Lung: Non-small Cell, Lung: Small Cell, Ovary/Fallopian tube, Pancreas, Skin:SCC Kidney	Supportive	NCC	0.926103	UpperGI	0.0261934	0.645	0.01052	Unclassified	Presumed gi
TAR00071	48.5315	Male	Former	Lymph node, bone	Adenocarcinoma, signet ring morphology	Negative gastroscopy		Right supraclavicular LN	0.5	ND	ND	ND	ND	ND	ND	ND	0	ND	ND	ND	ND	MNF116 (weakly)	CD2, CD20, CD3, CD30, CD4, CD45, CD5, CD7, CD8, PSA				No suspicion			None	LUAD	0.589921	LUSC	0.339415	0.783	0.1116	LUAD	Unknown
TAR00080	49.6575	Female	Never	Liver, soft tissue (pelvis), bone	SCC	Previous cervical cancer 10 years prior		Right iliac bone biopsy	0	0	1	ND	ND	ND	ND	ND	ND	ND	ND	ND	ND	p63	None		Cervical Squamous		Highly suspected	SPEN CCND1 EP300	Breast, Uterus:Endometrium Uterus:Endometrium Head and neck: other, Skin:SCC, Urothelial tract, Uterus:Endometrium	Not supportive	CervSq	0.999181	LUSC	0.000692962	0.708	0.0586	CervSq	Clinically consistent
TAR00094	57	Female	Current	Lymph nodes neck, mediastinum, hilar and left axilla, pleural and pericardial effusions	Poorly differentiated carcinoma	Breast excluded		Left axilla lymph node	1	0	ND	ND	0	0	0	ND	0	ND	ND	0	0	None	NapsinA, CK14, GCDFp-15, p63, HER2, Thyroglobulin				No suspicion	KMT2A DICER1 BCOR	Melanoma, Urothelial tract, Uterus:Endometrium Uterus:Endometrium Salivary gland/Adenoid cystic, Uterus:Endometrium	Not supportive	LUSC	0.963837	Gynae	0.0129549	0.779	0.05132	LUSC	Unknown
TAR00122	57.7068	Female	Never	Lung and bone	SCC	Bladder excluded		Lymph node - no detailed IHC	ND	ND	ND	ND	ND	ND	ND	ND	ND	ND	ND	ND	ND	None	Uroplakin-2				No suspicion	KMT2D CIC MED12	Anogenital, Head and neck: other, Lung: Small Cell, Skin:SCC, Urothelial tract, Uterus:Endometrium Colorectum/Appendix/Small intestine, Uterus:Endometrium Prostate	Not supportive	CervSq	0.947889	LowerGI	0.0207274	0.657	0.0146	CervSq	Clinically consistent
TAR00169	60	Female	Former	Liver, Lungs & Lymph Nodes	moderately to poorly differentiated adenocarcinoma	Radiology reviewed and suggestive of primary cholangiocarcinoma	Intrahepatic cholagiocarcinoma	Liver biopsy	1	0	ND	1	0	0	0	ND	0	ND	0	ND	0	None	Synaptophysin, chromogranin, hepatocyte antigen, CD56	Cholangiocarcinoma			Clinically resolved			None	NCC	0.873578	CHOL	0.0311435	0.8	0.008044	Unclassified	Confirmed
TAR00182	79	Female	Never	Lymph Nodes (below diaphragm) and pelvic mass	Poorly differentiated adenocarcinoma	Pathology likely gynae, ER positive; Radiology unusual for gynae origin but treated as gynaecological malignancy	Female genital tract	Left groin lymph node	1	0	ND	ND	0	ND	ND	ND	0	ND	1	ND	1	CA125	GCDFP-15, CA199	Gynae			Clinically resolved	CDH1 TP53	Breast, Esophagus/Stomach Colorectum/Appendix/Small intestine, Esophagus/Stomach, Lung: Non-small Cell, Lung: Small Cell, Ovary/Fallopian tube, Pancreas, Skin:SCC	Supportive	Gynae	0.990516	KIRP	0.0079477	0.615	0.1142	Gynae	Confirmed
TAR00238	70	Female	Former	Subcarinal bilateral hilar lymphadenopathy, possible pancreatic lesion	Mucinous adenocarcinoma	UGI/pancretobilary or lung with intestinal differentiation. Repeat biopsy confirms lung adenocarcinoma	NSCLC	EBUS mediastinal node	1	0	ND	ND	0.5	0	ND	0	0	ND	0	ND	0	None	p40, CA125	NSCLC			Clinically resolved	ATM ERBB3 NF1	Colorectum/Appendix/Small intestine, Uterus:Endometrium Colorectum/Appendix/Small intestine, Esophagus/Stomach, Urothelial tract, Uterus:Endometrium Melanoma, Uterus:Endometrium	Not supportive	NCC	0.225441	UpperGI	0.171424	0.786	0.005012	Unclassified	Confirmed
TAR00242	67	Male	Never	Intraabdominal lymph nodes, right groin lymph nodes	Poorly differentiated adenocarcinomapossible GI/anal	Consider GI pathology, Presumed ano-rectal		Right groin lymph node	1	0.5	ND	1	1	ND	ND	0	0	ND	ND	ND	0	None	PSA, MelanA, p63, p16		GI		Highly suspected			None	UpperGI	0.878384	LowerGI	0.0946957	0.754	0.08249	UpperGI	Clinically consistent
TAR00243	74	Male	Former	Bone, liver, lung, lymph nodes	moderately differentiated Adenocarcinoma	Probable lung primary given TTF 1 positive, no clear lung primary	NSCLC	Left groin lymph node	ND	ND	ND	ND	ND	ND	ND	0	1	ND	ND	ND	ND	NapsinA	Racemase, PSA, RCC, p63	NSCLC			Clinically resolved	KDR BRAF	Melanoma Colorectum/Appendix/Small intestine, Melanoma, Thyroid gland	Not supportive	LUAD	0.999771	LUSC	0.000222857	0.823	0.01934	LUAD	Confirmed
TAR00272	47	Female	Former	Liver, abdominal lymphadenopathy	poorly differentiated carcinoma	Not sufficiently conclusive for SCC, ?small bowel primary		Liver biopsy	ND	0	1	ND	0	0	0	0.5	0	ND	0	ND	0	Cam5.2, MBF116, CD10, 34Beta12 (weakly), synaptophysin (weakly), CD56 (weakly)	p40, PLAP, OCT3/4, S100		Small bowel primary		Highly suspected	APC NOTCH1 TP53	Colorectum/Appendix/Small intestine Head and neck: other,Skin:SCC Colorectum/Appendix/Small intestine, Esophagus/Stomach, Lung: Non-small Cell, Lung: Small Cell, Ovary/Fallopian tube, Pancreas, Skin:SCC	Supportive	LowerGI	0.636491	UpperGI	0.275917	0.767	0.2129	LowerGI	Clinically consistent
TAR00288	61	Female	Current	peritoneal and omental disease	Serous tubal intraepithelial carcinoma ?yolk sac, poorly differentiated	Consider unusual gynae origin based on initial pathology and radiology - Serum AFP found to be raised - consistent with yolk sac primary	Female genital tract	Omental biopsy	0	0.5	ND	1	1	ND	ND	ND	0	ND	0	ND	0	Glypican3, AFP	CD56, CK19, calretinin, synaptophysin, p63, p53, CA125	Yolk sac gynaecological malignancy			Clinically resolved			None	BLCA	0.527418	Gynae	0.343117	0.73	0.1666	BLCA	Inconsistent
TAR00326	60	Female	Current	Bone and liver	Adenocarcinoma	UGI/Pancbiliary/bladder, salivary, ovarian, breast less likely based on pathology		Bone biopsy	1	0.5	ND	ND	0.5	0	1	ND	0	ND	ND	ND	0	None	GCDFP-15, Mammoglobin				No suspicion	CASP8	Head and neck: other, Uterus:Endometrium	Not supportive	LUSC	0.500612	BLCA	0.37315	0.837	0.0837	LUSC	Unknown
TAR00328	52	Female	Never	Large liver met, omental and peritoneal disease, bone mets, lung mets, cystic ovarian mass	Adenocarcinoma	UGI/HPB suspected, intrahepatic cholangiocarcinoma later confirmed	Intrahepatic cholagiocarcinoma	Liver biopsy	1	1	ND	1	0	0	ND	ND	0	0	ND	ND	ND	None	Glypican3, AFP	Cholangiocarcinoma			Clinically resolved	IDH1 PBRM1	Bile duct/Gallbladder, Melanoma Bile duct/Gallbladder, Kidney	Supportive	CHOL	0.827527	LUSC	0.0825991	0.813	0.03348	CHOL	Confirmed
TAR00384	73	Male	Former	Right groin lymphadenopathy, pagets of groin, abdominal lymphadenopathy	Metastatic poorly differentiated adenocarcinoma with apocrine differentiation	Extramammary pagets of suprapubic area -consider breast, skin, urothelial, anogenital		Lymph node	1	0	1	ND	ND	ND	1	ND	0	ND	ND	0	0.5	GCDFP-15	CD3, PSA, p40, PLAP, Uroplakin2, CD20, Mammoglobin, S100, calretinin			Breast, skin, urothelial, anogenital	Differential diagnosis	PIK3CA ATM SMARCA4	Anogenital, Breast, Colorectum/Appendix/Small intestine, Urothelial tract, Uterus:Endometrium Colorectum/Appendix/Small intestine, Uterus:Endometrium Lung: Non-small Cell	Supportive several	BRCA	0.995649	PRAD	0.00132088	0.751	0.03491	BRCA	Clinically consistent
TAR00414	63	Male	Unknown	Cervial lymph nodes and hilar	Poorly differentiated carcinoma	Pathology differential diagnosis - head and neck, lung and upper GI		left neck Lymph node	1	0	ND	ND	0	ND	ND	1	0	ND	ND	ND	ND	MNF116, S100, p63 (weakly)	CD56, PSA, choromogranin, hepatocyte antigen, LCA			Head and neck, lung and UGI	Differential diagnosis	GRIN2A TP53	Melanoma Colorectum/Appendix/Small intestine, Esophagus/Stomach, Lung: Non-small Cell, Lung: Small Cell, Ovary/Fallopian tube, Pancreas, Skin:SCC	Supportive several	UpperSq	0.797738	LUSC	0.191537	0.774	0.1343	UpperSq	Clinically consistent
TAR00446	69	Male	Never	Liver , peritoneal, nodal and bone	Well differentiated adenocarcinoma	GI/pancreatic, Classical intrahepatic cholangiocarcinoma on subsequent radiology review	Intrahepatic cholagiocarcinoma	Peritoneal node	1	1	ND	ND	0	ND	ND	ND	0	ND	ND	ND	ND	CEA	NKX3.1, PSA	Cholangiocarcinoma			Clinically resolved			None	CHOL	0.525433	UpperGI	0.253984	0.707	0.01907	CHOL	Confirmed
TAR00457	24	Female	Never	Mediastinal mass, plasma TARC raised and SOCS1 mutation on ctDNA	Poorly differentiated carcinoma	Initial MDT andpathology ?rhabdosarcoma, subsequent core biopsy - CD30 CD15 positive and PAX5 staingin, -ve CD20 and MUM1, final diagnosis confirmed with plasma TARC level	Nodular sclerosis classical HL	Mediastinal mass	ND	ND	1	ND	ND	0	ND	ND	0	ND	ND	ND	ND	Desmin, SMA	PLAP, CD20, CD117, synaptophysin, S100	Nodular sclerosis classical HL			Clinically resolved	SETD2 FGFR3 NOTCH1	Kidney, Lung: Non-small Cell, Mesothelium Urothelial tract Head and neck: other, Skin:SCC	Not supportive	DLBC	0.996593	UpperSq	0.000935362	0.813	0.119	DLBC	Confirmed
TAR00473	45	Female	Never	Abdominal wall mass, abdominal lymphadenopathy bone mets	Mucinous atypical	Previous borderline mucinous tumour - likley recurrance, exlude GI/HPB malignancy	presumed ovarian or peritonal	Abdominal wall biopsy	1	0.5	ND	ND	0	0	0	ND	0	ND	ND	ND	0	CEA, EMA	NapsinA, synaptophysin, glypican3, chromogrannin, AFP, racemase			Ovarian or peritoneal, exclude GI/HPB	Differential diagnosis			None	Gynae	0.46755	UpperSq	0.0804207	0.784	0.009911	Unclassified	Unknown
TAR00507	26	Male	Former	Right sided neck mass, lung	Poorly differentiated malignant neoplasm	Central pathology review confirmed sarcoma	Monophasic synovial sarcoma	Right Neck node	0	0	0.5	ND	ND	ND	ND	ND	ND	ND	ND	ND	ND	CD56	Synaptophysin, chromogranin, OCT4, S100, MelanA, CD45	Monophasic synovial sarcoma			Clinically resolved			None	SARC	0.815348	Gynae	0.0638818	0.682	0.1276	SARC	Confirmed
TAR00509	64	Female	NK	Bone and adrenal, lung	Poorly differentiated carcinoma	Possibly renal on histology		Lumbar paravertebral mass	1	ND	1	ND	ND	1	ND	ND	ND	ND	1	ND	ND	MNF116, EMA	Caltretinin, SF-1, Desmin, H-Caldesmon, ERG		Renal		Highly suspected	ARID1A SF3B1 NF2	Bile duct /Gallbladder, Esophagus/Stomach, Urothelial tract, Uterus:Endometrium Breast, Melanoma Kidney, Mesothelium	Supportive	KIRP	0.91354	KIRC	0.0441769	0.602	0.1443	KIRP	Clinically consistent
C006169	70.5945	Male	NK	Rigth UL mass and widespead right pleural mets, mediastinal lymphadenopathy	Poorly differentiated carcinoma	Lung MDT excluded lung - pleural tumour - path negative for mesothelioma		Mediastinal LN	ND	ND	ND	ND	ND	ND	ND	0.5	0	ND	ND	ND	ND	MNF116, 95% PDL1 expression	NapsinA, p40				No suspicion	Failed QC		None	MESO	0.514993	LUAD	0.129738	0.511	0.005311	MESO	Unknown
C006272	69.7699	Male	NK	Solitary L2 vertebral mets, liver lesion identified later on	Poorly differentiated carcinoma	'Focal liver malignant neoplasm' identified retrospectively on review of imaging		Bone biopsy	0	0	ND	ND	0	0	ND	0	0	ND	ND	ND	ND	Cam5.2	PSA, OCT3/4, synaptophysin, chromogranin, LCA, MelanA, S100, p63, HMB-45		Primary liver malignancy		Highly suspected	MTOR ARID1A CBF	Colorectum/Appendix/Small intestine, Kidney, Uterus: endometrium Bile duct/Gallbladder, Eosophagus/Stomach, Urothelial tract, Uterus: endometrium Breast	Not supportive	LIHC	0.999446	CHOL	0.000529505	0.746	0.109	LIHC	Clinically consistent
C006292	52	Female	NK	Intra-abdominal, adenexal and pelvic lymphadenopathy	Poorly differentiated carcinoma	?GI/biliary on first MDT review, uterus enlarging on subsequent imaging - highly suspicious of gynae origins		left abdominal wall	0.5	0	1	ND	0.5	0	ND	ND	0	ND	0	ND	0	Synaptophysin (weakly), chromogranin (weakly)	GCDFP-15		Gynae		Highly suspected	ARID1A CTNNB1 ATR FBXW7 ARID1B	Bile duct /Gallbladder, Esophagus/Stomach, Urothelial tract, Uterus:Endometrium Adrenal, Liver, Uterus:Endometrium Uterus:Endometrium Anogenital, Colorectum/Appendix/Small intestine, Head and neck: other, Urothelial tract, Uterus:Endometrium Uterus:Endometrium	Supportive	Gynae	0.999808	CervSq	0.000145496	0.829	0.01615	Gynae	Clinically consistent
C006407	64	Female	NK	Bone, lung, left renal abnormality	Poorly differentiated carcinoma	Enlarging renal mass path suspicious for Renal although female genital tract cannot be excluded. Subsequently biopsied and consistent with renal cell - excluded medullary INI-1 -ve, morphology not typical for collecting duct - RCC unclassified. Not gynae radiologically		Bone biopsy, ileum	0	0	0	ND	ND	1	0	ND	ND	ND	ND	0	0	Cam5.2, MNF116, CD10 (weakly), vimentin, CAIX (weakly)	34Beta12, Uroplakin-2, S100, ERG, TFE3		Renal		Highly suspected	SMARCA4 NF2	Lung: Non-small Cell Kidney, Mesothelium	Supportive	KIRP	0.883737	KIRC	0.0775453	0.781	0.1739	KIRP	Clinically consistent
C006462	62	Male	NK	Supraclavicular, intrathoracic, retroperitoneal lymphadenopathy	Poorly differentiated adenocarcinoma	Normal endoscopy - pathology suggestive of GI primary, treated as CRC	CRC	Neck lymph nodes	0	0.5	1	ND	1	0	0	0	ND	ND	0	ND	ND	None	NKX3.1, PSA, p40, synaptophysin, chromogranin, S100, p63, PAP, calretinin, CD45	CRC			Clinically resolved	MSH6 CTNNB1 SETD2 PIK3CA MAP2K1 BLM CREBBP TP53 MAP2K4 SMARCA4 CIC EP300	Colorectum/Appendix/Small intestine, Uterus:Endometrium Adrenal, Liver, Uterus:Endometrium Kidney, Lung: Non-small Cell, Mesothelium Anogenital, Breast, Colorectum/Appendix/Small intestine, Urothelial tract, Uterus:Endometrium Melanoma Colorectum/Appendix/Small intestine, Uterus:Endometrium Urothelial tract Colorectum/Appendix/Small intestine, Esophagus/Stomach, Lung: Non-small Cell, Lung: Small …	Supportive	Gynae	0.280664	UpperGI	0.191927	0.746	0.1526	Unclassified	Confirmed
C008056	48.3233	Female	NK	Pelvic mass, intra-abdominal lymphadenopathy, lung mets	Poorly differentiated adenocarcinoma	Initial pathology differential included UGI, pancreatobiliary, lung, breast, female genital tract, note previous TAH and oopherectomy. Suspicion of gynae origins but PAX8 negativity not compatible, p53 and ER focal positive, CT showed normal left overy in situ		Pelvic mass	1	0	ND	ND	0	0	0	ND	0	ND	0	0	0.5	p53	34Beta12, GCDFP-15, p63, CA125		Gynae		Highly suspected	BRAF PAX5 PTEN TP53 CDK12	Colorectum/Appendix/Small intestine, Melanoma, Thyroid gland Colorectum/Appendix/Small intestine Uterus:Endometrium Colorectum/Appendix/Small intestine, Esophagus/Stomach, Lung: Non-small Cell, Lung: Small Cell, Ovary/Fallopian tube, Pancreas, Skin:SCC Prostate	Supportive	Gynae	0.999975	BRCA	1.50274e-05	0.74	0.1632	Gynae	Clinically consistent
C008200	54.7918	Female	NK	Left axilla	Poorly differentiated carcinoma	Initially treated as breast but unusual path -->CUP, exclude lung		Left axilallary nodes	0.5	0	0	ND	ND	0.5	0	0	ND	ND	0	0	0	MNF116, CD10	CD34, 34Beta12, NapsinA, P40, PLAP, S100, p63, SOX10, SF-1				No suspicion			None	NCC	0.614069	LIHC	0.0534403	0.733	0	Unclassified	Unknown
C008204	71.3397	Female	NK	Liver, mediastinum bone lesion, rt breast nodule	Moderate to poorly differentiated adenocarcinoma	Pathology unclear of primary - gynae MDT excluded, endoscopy NAD, breast nodule NAD; radiology retrospectively reviewed and consistent with intrahepatic cholangiocarcinoma		Sternal mass	1	0	ND	1	0	ND	ND	0	0	0	0	0	0	None	NapsinA, Mammoglobin, Calretinin		Consistent with cholangiocarcinoma		Highly suspected	BAP1 PBRM1 KRAS BCOR	Bile duct/Gallbladder, Kidney, Mesothelium Bile duct/Gallbladder, Kidney Colorectum/Appendix/Small intestine, Lung: Non-small Cell, Pancreas Salivary gland/Adenoid cystic, Uterus:Endometrium	Supportive	CHOL	0.987629	LUSC	0.0049899	0.774	0.5335	CHOL	Clinically consistent
C008287	74.1315	Female	NK	Bone, pleura, lymph nodes, adrenal nodule	Well differentiated adenocarcinoma	pathology favours breast however negative mammography		Pleural biopsy, adrenal biopsy normal	1	0	ND	1	0	0	1	0	0	ND	0	0	0	CEA	NapsinA, p40, Mammoglobin, Calretinin		Favours breast		Highly suspected			None	UpperGI	0.511445	KIRC	0.120193	0.68	0.01048	UpperGI	Inconsistent
C008369	65.8137	Male	NK	Liver, Lung, pleural effusion	Adenocarcinoma	UGI or HPB or TTF1 -ve lung, central review of pathology determined gastric carcinoma	Gastric cancer	Pleural biopsy	1	0	ND	1	1	ND	ND	ND	0	ND	ND	ND	ND	MOC31, PDL1 1-3%	NapsinA, PSA, RCC	Gastric cancer			Clinically resolved			None	CHOL	0.944705	LUAD	0.0242894	0.678	0.1383	CHOL	Inconsistent
C009157	51	Male	NK	Widespread nodal metastases	Poorly differentiated metastatic anaplastic carcinoma			Cervical lymph node	1	0	ND	ND	0	1	0	0	0	ND	ND	ND	ND	MNF116, CD10 (weakly), vimentin (weakly), CK19	NapsinA, PSA, PLAP, OCT3/4, hepatocyte antigen, p63, Pan-Melanoma, calretinin, CD45				No suspicion			None	KIRP	0.443618	KIRC	0.341768	0.693	0.01239	Unclassified	Unknown
C009262	44	Female	NK	lung, liver, nodal	Adenocarcinoma	UGI/pancreatobiliary suspected, radiologyreviewed and subsequently confirmed intrahepatic cholangiocarcinoa	Intrahepatic cholagiocarcinoma	Liver biposy	1	0	ND	ND	0	0	0	ND	0	ND	ND	ND	ND	None	None	Cholangiocarcinoma			Clinically resolved	PIK3CA TP53	Anogenital, Breast, Colorectum/Appendix/Small intestine, Urothelial tract, Uterus:Endometrium Colorectum/Appendix/Small intestine, Esophagus/Stomach, Lung: Non-small Cell, Lung: Small Cell, Ovary/Fallopian tube, Pancreas, Skin:SCC	Not supportive	CHOL	0.993294	LIHC	0.00307311	0.769	0.4147	CHOL	Confirmed
C009407	69	Male	NK	Nodal and bone	Poorly differentiated adenocarcinoma	Skin or possibly breast		LN and bladder biopsies	1	ND	ND	ND	ND	ND	0.5	0.5	0	ND	ND	0	0	CK19, CK8/111, 34Beta12 (weakly), CD10 (weakly), p40 (weakly)	Uroplakin-2, synaptophysin, glypican3, chromogranin, heaptocyte antigen, p16			Skin or breast	Differential diagnosis	ATR PAX5 ERBB3 NF1	Uterus:Endometrium Colorectum/Appendix/Small intestine Colorectum/Appendix/Small intestine, Esophagus/Stomach, Urothelial tract, Uterus:Endometrium Melanoma, Uterus:Endometrium	Supportive	LUSC	0.4784	BRCA	0.310652	0.754	0.01541	NoPrediction	Unknown
