# Supplementary material for: CUPiD: A cfDNA methylation-based tissue-of-origin classifier for Cancers of Unknown Primary
Source: Research Square preprint supplement (doi:10.21203/rs.3.rs-3758456/v1), 2023-12-26
Supplement: Supplementary file 8 [file e940bd519fadd88ec3a34e78.xlsx]

## Sheet: CUP_methylation_metrics
Supplementary Table 8: Clinical characteristics and T7-MBD-Seq metrics from cfDNA samples of 41 patients with CUP. Sequencing details for the enriched fractions (blue) and non-enriched fractions (green).
sample_name	type	age	sex	source	cfDNA yield (ng/mL)	DNA input (ng)	ichorCNA Tumour Fraction	Hyper-stable Fraction	Initial Reads	Mapped Reads	Deduplicated Reads	Total Fragments in QSEA	Final Valid Fragments	enrichment score (relH)	enrichment score (GoGe)	Initial Reads (non-enriched)	Mapped Reads (non-enriched)	Deduplicated Reads (non-enriched)	Total Fragments in QSEA (non-enriched)	Final Valid Fragments (non-enriched)	enrichment score (relH), non-enriched	enrichment score (GoGe), non-enriched
TAR00007	CUP	68	Male	TARGET trial	1.96	35	0.2594	0.698	57212048	47012332	35495691	12937434	11623848	3.98776	2.0906	6601240	5339265	4536973	1920558	1861628	1.4078	0.949713
TAR00013	CUP	49	Female	TARGET trial	19.1	11.2	0.08492	0.445	11730598	11013182	9835774	3925388	3509793	4.25376	2.15789	1353006	1287963	1180335	529311	502181	1.59345	1.00444
TAR00043	CUP	70	Female	TARGET trial	41.56	35	0.1421	0.74	17357872	16654110	15401392	5936137	5369197	4.15745	2.12856	1575126	1515417	1448469	603109	578258	1.5214	0.974238
TAR00057	CUP	61	Female	TARGET trial	4.17	7.3	0.05169	0.822	143067868	129899294	98569933	37686173	33423245	3.16091	1.85839	10647394	9097504	7876260	3262964	3091827	1.28203	0.921153
TAR00062	CUP	48	Female	TARGET trial	15.21	26.61	0.01481	0.807	39561882	38380273	35718948	13715716	12249693	4.27191	2.15785	3701020	3621367	3486772	1452281	1380047	1.47852	0.946827
TAR00068	CUP	51	Female	TARGET trial	5.45	9.54	0.1689	0.654	27616794	26204329	23535713	9109964	8060137	4.5986	2.28567	4021808	3842448	3610924	1499769	1425367	1.42413	0.973448
TAR00069	CUP	69	Female	TARGET trial	36.36	35	0.05233	0.634	34664090	33761016	31183876	12730791	11360046	4.37297	2.24525	6073544	5963015	5691934	2572536	2448501	1.53386	0.990888
TAR00070	CUP	32	Male	TARGET trial	13.11	22.95	0.01052	0.645	26237978	25653364	23967895	9203479	8205360	4.18781	2.21678	4283546	4212102	4028382	1782949	1724979	1.39379	0.962753
TAR00071	CUP	49	Male	TARGET trial	4.44	7.77	0.1116	0.783	36867852	35232875	32034567	12285782	11062767	4.53709	2.26396	4054756	3822047	3584062	1393377	1344744	1.38434	0.965196
TAR00080	CUP	50	Female	TARGET trial	3.45	6.04	0.0586	0.708	49221590	47381233	42846429	16593606	14721159	4.44496	2.25635	5557054	5331258	5036684	1957093	1853343	1.35691	0.948263
TAR00094	CUP	57	Female	TARGET trial	4.66	8.05	0.05132	0.779	102849144	91846327	72408731	26769795	23578649	3.78634	2.05885	11317262	9514549	8394451	3461352	3267000	1.30179	0.922642
TAR00122	CUP	57	Female	TARGET trial	3.49	35	0.0146	0.657	22599790	19223812	14887627	5370478	4721072	4.33811	2.17854	3200298	2342084	2000936	839426	796402	1.39268	0.951552
TAR00169	CUP	60	Female	TARGET trial	74.73	14.97	0.008051	0.8	78331180	74981502	68021085	25336217	22608318	4.74387	2.27688	6847216	6616605	6097522	2395939	2275739	1.54175	0.989887
TAR00182	CUP	79	Female	TARGET trial	8.55	31.6	0.1142	0.615	16339336	15671842	14453700	5720166	5068119	4.23158	2.20173	2575106	2490473	2342096	1036846	985425	1.41766	0.961789
TAR00238	CUP	69	Female	TARGET trial	18.06	19.6	0.005012	0.786	68245356	61637717	51353100	19954668	17598809	4.36075	2.20782	11684494	10260877	9013839	3604116	3413475	1.29581	0.904776
TAR00242	CUP	67	Male	TARGET trial	3.11	3.89	0.08249	0.754	56631870	46550614	35127822	12548707	11220266	3.80704	2.03744	6627508	4782454	4095493	1680333	1623049	1.27627	0.917075
TAR00243	CUP	74	Male	TARGET trial	42.74	35	0.01934	0.823	146273132	126675294	103642657	36226084	32371223	4.88846	2.31266	36579144	31623976	28210353	12113015	11733411	1.53773	0.979509
TAR00272	CUP	47	Female	TARGET trial	1.61	8.45	0.2129	0.767	188176158	174114896	125427355	44700934	39206628	4.88763	2.3761	32668836	29032218	24730026	10394524	9950118	1.23582	0.905364
TAR00288	CUP	61	Female	TARGET trial	5.35	11.59	0.1666	0.73	31067956	29676243	26741562	10601469	9468956	3.96068	2.11646	4452546	4267944	4012610	1611977	1536435	1.36558	0.959295
TAR00326	CUP	60	Female	TARGET trial	117.03	35	0.0837	0.837	100605306	88664520	64130724	24264261	21486134	5.00912	2.30184	7652002	6710120	5644911	2407240	2289139	1.5408	0.984388
TAR00328	CUP	51	Female	TARGET trial	71.45	35.01	0.03348	0.813	59749316	57200527	53071260	20049771	17876341	4.04331	2.14004	6236028	6056478	5835721	2382792	2255915	1.28692	0.908033
TAR00384	CUP	73	Male	TARGET trial	13.92	35	0.03491	0.751	68091162	58056793	47514804	17192289	15569083	3.81789	1.99671	13222296	11240378	10143161	4328608	4191096	1.48806	0.976171
TAR00414	CUP	63	Male	TARGET trial	3.74	10.1	0.1343	0.774	40875922	36529517	27247516	10168432	9107613	4.03546	2.12469	6258192	5213569	4499844	1929738	1866115	1.35133	0.928981
TAR00446	CUP	69	Male	TARGET trial	13.6	17.48	0.01907	0.707	58788084	55555377	49050426	19143008	17406065	3.33719	1.97393	5666826	5407707	5102226	2043867	1975992	1.34176	0.950521
TAR00457	CUP	24	Female	TARGET trial	20.2	35	0.119	0.813	56857432	50407171	37107323	14042973	12418671	4.60368	2.23605	18910878	17100962	15292501	6548118	6224199	1.31723	0.948121
TAR00473	CUP	45	Female	TARGET trial	4.2	11.7	0.009911	0.784	47983132	42781704	35095746	13298371	11697353	4.40509	2.20659	8617574	7237000	6285093	2514001	2383874	1.31355	0.902309
TAR00507	CUP	26	Male	TARGET trial	57.72	20	0.1276	0.682	23831862	20434303	16455990	5212126	4602509	5.0801	2.36594	7277228	5978592	5263266	2176380	2099197	1.724	1.05923
TAR00509	CUP	64	Female	TARGET trial	4.44	20	0.1443	0.602	21191744	17972077	14502020	4696324	4130789	4.03918	2.10293	5090414	4180237	3711205	1567157	1491021	1.3659	0.944414
C006169	CUP	71	Male	Biobank	3.12	10	0.005311	0.511	10942662	8902216	7353156	2773528	2465725	4.49098	2.2314	1982966	1266552	1084016	431802	414575	1.41509	0.920527
C006272	CUP	70	Male	Biobank	2.03	10	0.109	0.746	37201984	31819060	26306498	9982890	8963657	4.30057	2.19556	6251830	4452304	3820503	1473917	1422650	1.35481	0.906119
C006292	CUP	52	Female	Biobank	188.94	20	0.01615	0.829	104288670	86933892	68746529	22306565	19837060	3.75339	2.04451	29449098	25565582	22569431	9206392	8773663	1.31744	0.941099
C006407	CUP	64	Female	Biobank	66.5	20	0.1739	0.781	93157044	76786313	61294490	21445927	19234739	3.28276	1.80549	12451148	10213457	9071154	3832078	3638065	1.47621	0.971082
C006462	CUP	62	Male	Biobank	17.53	20	0.1526	0.746	60083516	45390589	36013504	12396005	11206921	4.33218	2.16556	12200470	9574978	8447811	3634119	3527354	1.59569	1.00741
C008056	CUP	48	Female	Biobank	11.97	20	0.1632	0.74	38544044	33111187	26443128	8905803	7869111	4.589	2.22459	9423366	8224185	7261427	3107638	2959627	1.57961	1.00039
C008200	CUP	55	Female	Biobank	5.11	8	0	0.733	27886256	24121730	18511679	6757071	5940959	3.99265	2.10475	3341336	2612863	2243747	937810	891416	1.35759	0.932662
C008204	CUP	71	Female	Biobank	44.73	20	0.5335	0.774	116624386	95482221	75731440	24418301	21691465	4.37145	2.17646	24557018	20185480	17807783	7346303	7006078	1.54267	0.9968
C008287	CUP	74	Female	Biobank	6.51	20	0.01048	0.68	23651106	17890946	14437261	4886268	4305974	4.45965	2.18167	5816032	3937741	3485519	1475814	1404086	1.53277	1.00109
C008369	CUP	66	Male	Biobank	10.76	20	0.1383	0.678	27616502	22496391	17870392	6076656	5425800	4.33778	2.1793	7437708	5932880	5227099	2183386	2112075	1.46407	0.974226
C009157	CUP	51	Male	Biobank	7.88	20	0.0105	0.693	30876232	23212438	18634076	6052882	5392241	3.8434	2.06763	7254866	6031208	5357470	2152521	2079526	1.32389	0.945042
C009262	CUP	44	Female	Biobank	109.24	20	0.4147	0.769	132720050	112218883	87568069	28110997	24668050	3.96436	2.13502	30381578	26400897	23096509	9032297	8531384	1.31495	0.94857
C009407	CUP	69	Male	Biobank	1.55	8	0.01541	0.754	57921218	52683537	40157071	14096309	12462410	4.12698	2.14624	6658104	5535330	4720904	1949145	1885970	1.4021	0.950243
