# Supplementary material for: CUPiD: A cfDNA methylation-based tissue-of-origin classifier for Cancers of Unknown Primary
Source: Research Square preprint supplement (doi:10.21203/rs.3.rs-3758456/v1), 2023-12-26
Supplement: Supplementary file 9 [file fd3685c1b60585ab9ca7a04c.xlsx]

## Sheet: CUP_predictions
Supplementary Table 9: CUPiD Predictions in the CUP cohort
sample_name	CUPiD prediction	Highest Predicted Class	Prediction score value for Highest Predicted Class	Second Highest Predicted Class	Prediction score value for Second Highest Predicted Class	Fraction of Hyperstable methylated windows with beta value over 0.4	Estimated tumour fraction from ichorCNA
C006169	MESO	MESO	0.515	LUAD	0.13	0.511	0.005
C006272	LIHC	LIHC	0.999	CHOL	0.001	0.746	0.109
C006292	Gynae	Gynae	1	CervSq	0	0.829	0.016
C006407	KIRP	KIRP	0.884	KIRC	0.078	0.781	0.174
C006462	Unclassified	Gynae	0.281	UpperGI	0.192	0.746	0.153
C008056	Gynae	Gynae	1	BRCA	0	0.74	0.163
C008200	NCC	NCC	0.614	LIHC	0.053	0.733	0
C008204	CHOL	CHOL	0.988	LUSC	0.005	0.774	0.534
C008287	UpperGI	UpperGI	0.511	KIRC	0.12	0.68	0.01
C008369	CHOL	CHOL	0.945	LUAD	0.024	0.678	0.138
C009157	Unclassified	KIRP	0.444	KIRC	0.342	0.693	0.012
C009262	CHOL	CHOL	0.993	LIHC	0.003	0.769	0.415
C009407	Unclassified	LUSC	0.478	BRCA	0.311	0.754	0.015
TAR00007	LUSC	LUSC	0.696	UpperSq	0.174	0.698	0.259
TAR00013	CHOL	CHOL	0.948	LUSC	0.031	0.445	0.085
TAR00043	Unclassified	UpperGI	0.466	BLCA	0.326	0.74	0.142
TAR00057	KIRP	KIRP	0.674	KIRC	0.133	0.822	0.052
TAR00062	UpperGI	UpperGI	0.621	LUSC	0.241	0.807	0.015
TAR00068	BRCA	BRCA	1	LUSC	0	0.654	0.169
TAR00069	Gynae	Gynae	0.862	SARC	0.048	0.634	0.052
TAR00070	NCC	NCC	0.926	UpperGI	0.026	0.645	0.011
TAR00071	LUAD	LUAD	0.59	LUSC	0.339	0.783	0.112
TAR00080	CervSq	CervSq	0.999	LUSC	0.001	0.708	0.059
TAR00094	LUSC	LUSC	0.964	Gynae	0.013	0.779	0.051
TAR00122	CervSq	CervSq	0.948	LowerGI	0.021	0.657	0.015
TAR00169	NCC	NCC	0.874	CHOL	0.031	0.8	0.008
TAR00182	Gynae	Gynae	0.991	KIRP	0.008	0.615	0.114
TAR00238	Unclassified	NCC	0.225	UpperGI	0.171	0.786	0.005
TAR00242	UpperGI	UpperGI	0.878	LowerGI	0.095	0.754	0.082
TAR00243	LUAD	LUAD	1	LUSC	0	0.823	0.019
TAR00272	LowerGI	LowerGI	0.636	UpperGI	0.276	0.767	0.213
TAR00288	BLCA	BLCA	0.527	Gynae	0.343	0.73	0.167
TAR00326	LUSC	LUSC	0.501	BLCA	0.373	0.837	0.084
TAR00328	CHOL	CHOL	0.828	LUSC	0.083	0.813	0.033
TAR00384	BRCA	BRCA	0.996	PRAD	0.001	0.751	0.035
TAR00414	UpperSq	UpperSq	0.798	LUSC	0.192	0.774	0.134
TAR00446	CHOL	CHOL	0.525	UpperGI	0.254	0.707	0.019
TAR00457	DLBC	DLBC	0.997	UpperSq	0.001	0.813	0.119
TAR00473	Unclassified	Gynae	0.468	UpperSq	0.08	0.784	0.01
TAR00507	SARC	SARC	0.815	Gynae	0.064	0.682	0.128
TAR00509	KIRP	KIRP	0.914	KIRC	0.044	0.602	0.144
